# Supplementary material
Source: PubMed Central journal article supplement (PMC3423588)
Supplement: NIHMS382696-supplement-1_si_001.pdf [file NIHMS382696-supplement-1_si_001.pdf]

## SUPPORTING INFORMATION

### **Steric Restrictions of RISC in RNA Interference Identified with Size-Expanded RNA Nucleobases**

Armando R. Hernández, Larryn W. Peterson and Eric T. Kool\*

*Department of Chemistry, Stanford University, Stanford, CA 94305-5080*

\* to whom correspondence should be addressed: kool@stanford.edu

#### CONTENTS:

|                                                                                                   |    |
|---------------------------------------------------------------------------------------------------|----|
| <b>Fig. S1:</b> Sequence of firefly luciferase <i>luc+</i> (pGL3 control vector) . . . . .        | 2  |
| <b>Table S1:</b> MALDI results and calculated extinction coefficients of synthesized siRNAs . . . | 3  |
| <b>Fig. S2:</b> RNAi activity data of siR-U series . . . . .                                      | 3  |
| <b>Fig. S3:</b> Melting temperature and RNAi activity for siR-U series . . . . .                  | 4  |
| <b>Fig. S4:</b> RNAi activity data of siR-xU series . . . . .                                     | 4  |
| <b>Fig. S5:</b> RNAi activity data of siR-xA series . . . . .                                     | 5  |
| <b>Fig. S6:</b> RNAi activity data of siR-xA3 and siR-xU3 series . . . . .                        | 5  |
| <b>Fig. S7:</b> Serum stability data for siR-U-00 and siR-U-01 . . . . .                          | 6  |
| <b>Fig. S8:</b> Serum stability data for siR-U-04 and siR-U-10 . . . . .                          | 7  |
| <b>Fig. S9:</b> Serum stability data for siR-U-18 and siR-U-19 . . . . .                          | 8  |
| <b>Fig. S10:</b> Serum stability data for siR-U-xA3 and siR-U-xU3 . . . . .                       | 9  |
| Materials and Methods . . . . .                                                                   | 10 |
| References . . . . .                                                                              | 13 |
| NMR spectra . . . . .                                                                             | 14 |

```

251           A TGGAAGACGC CAAAAACATA
301 AAGAAAGGCC CGGCGCCATT CTATCCGCTG GAAGATGGAA CCGCTGGAGA
351 GCAACTGCAT AAGGCTATGA AGAGATACGC CCTGGTTCCT GGAACAATTG
401 CTTTTACAGA TGCACATATC GAGGTGGACA TCACTTACGC TGAGTACTTC
451 GAAATGTCCG TTCGGTTGGC AGAAGCTATG AAACGATATG GGCTGAATAC
501 AAATCACAGA ATCGTCGTAT GCAGTAAAA CTCTCTCAA TTCTTTATGC
551 CGGTGTTGGG CGCGTTATTT ATCGGAGTTG CAGTTGCGCC CGCGAACGAC
601 ATTTATAATG AACGTGAATT GCTCAACAGT ATGGGCATTT CGCAGCCTAC
651 CGTGGTGTTC GTTTCCAAAA AGGGGTGCA AAAAATTTG AACGTGCAAA
701 AAAAGCTCCC AATCATCCAA AAAATTATTA TCATGGATTC TAAAACGGAT
751 TACCAGGGAT TTCAGTCGAT GTACACGTTT GTCACATCTC ATCTACCTCC
801 CGGTTTTAAT GAATACGATT TTGTGCCAGA GTCCTTCGAT AGGGACAAGA
851 CAATTGCACT GATCATGAAC TCCTCTGGAT CTA CTGGTCT GCCTAAAGGT
901 GTCGCTCTGC CTCATAGAAC TGCCTGCGTG AGATTCTCGC ATGCCAGAGA
951 TCCTATTTTT GGCAATCAA TCATTCCGGA TACTGCGATT TTAAGTGTG
1001 TTCCATTCCA TCACGGTTTT GGAATGTTTA CTACACTCGG ATATTTGATA
1051 TGTGGATTTC GAGTCGTCTT AATGTATAGA TTTGAAGAAG AGCTGTTTCT
1101 GAGGAGCCTT CAGGATTACA AGATTCAAAG TGCCTGCTG GTGCCAACCC
1151 TATTCTCCTT CTTGCCAAA AGCACTCTGA TTGACAAATA CGATTTATCT
1201 AATTTACAGC AAATTGCTTC TGGTGGCGCT CCCCTCTCTA AGGAAGTCGG
1251 GGAAGCGGTT GCCAAGAGGT TCCATCTGCC AGGTATCAGG CAAGGATATG
1301 GGCTCACTGA GACTACATCA GCTATTCTGA TTACACCCGA GGGGGATGAT
1351 AAACCGGGCG CGGTCGGTAA AGTTGTTCCTA TTTTTGAAG CGAAGGTTGT
1401 GGATCTGGAT ACCGGGAAAA CGCTGGGCGT TAATCAAAGA GGCGAACTGT
1451 GTGTGAGAGG TCCTATGATT ATGTCCGGTT ATGTAAACAA TCCGGAAGCG
1501 ACCAACGCCT TGATTGACAA GGATGGATGG CTACATTCTG GAGACATAGC
1551 TTA CTGGGAC GAAGACGAAC ACTTCTTCAT CGTTGACCGC CTGAAGTCTC
1601 TGATTAAGTA CAAAGGCTAT CAGGTGGCTC CCGTGAATT GGAATCCATC
1651 TTGCTCCAAC ACCCCAACAT CTTGACGCA GGTGTCGAG GTCTTCCCGA
1701 CGATGACGCC GGTGAACTTC CCGCCGCCGT TGTGTTTTG GAGCACGGAA
1751 AGACGATGAC GGAAAAAGAG ATCGTGGATT ACGTCGCCAG TCAAGTAACA
1801 ACCGCGAAAA AGTTGCGCGG AGGAGTTGTG TTTGTGGACG AAGTACCGBA
1851 AGGTCTTACC GGAAAACTCG ACGCAAGAAA AATCAGAGAG ATCCTCATAA
1901 AGGCCAAGAA GGGCGGAAAG ATCGCCGTGT AA

```

**Figure S1.** Gene sequence of firefly luciferase *luc+* (pGL3 control vector - Promega); nucleotides 280-1932. The 19-mer sequence used to design the antisense strand of the siRNA duplex used in RNAi activity experiments can be found between nucleotides 1203-1221 (underlined, bold-faced and highlighted).



| Strand | Sequence                                      | Expected MW | Observed MW | $\epsilon_{260}$<br>( $M^{-1}cm^{-1}$ ) |
|--------|-----------------------------------------------|-------------|-------------|-----------------------------------------|
| AS-00  | 5'-AGAAGCAAUUUCGUGUAAATT-3'                   | 6697.948    | 6697.422    | 222,200                                 |
| AS-01  | 5'- <u><b>A</b></u> GAAGCAAUUUCGUGUAAATT-3'   | 6747.964    | 6747.966    | 225,100                                 |
| AS-03  | 5'-GA <u><b>A</b></u> GAAGCAAUUUCGUGUAAATT-3' | 6747.964    | 6747.962    | 225,100                                 |
| AS-04  | 5'-AGA <u><b>A</b></u> GCAAUUUCGUGUAAATT-3'   | 6747.964    | 6748.278    | 225,100                                 |
| AS-07  | 5'-AGAAGC <u><b>A</b></u> UUUCGUGUAAATT-3'    | 6747.964    | 6748.351    | 225,100                                 |
| AS-08  | 5'-AGAAGCA <u><b>A</b></u> UUUCGUGUAAATT-3'   | 6747.964    | 6748.358    | 225,100                                 |
| AS-09  | 5'-AGAAGCAA <u><b>U</b></u> UCGUGUAAATT-3'    | 6747.964    | 6748.614    | 213,200                                 |
| AS-10  | 5'-AGAAGCAAU <u><b>U</b></u> UCGUGUAAATT-3'   | 6747.964    | 6748.238    | 213,200                                 |
| AS-11  | 5'-AGAAGCAAUU <u><b>U</b></u> CGUGUAAATT-3'   | 6747.964    | 6751.651    | 213,200                                 |
| AS-14  | 5'-AGAAGCAAUUUCG <u><b>U</b></u> GUAAATT-3'   | 6747.964    | 6748.367    | 213,200                                 |
| AS-16  | 5'-AGAAGCAAUUUCGUG <u><b>U</b></u> AAATT-3'   | 6747.964    | 6747.856    | 213,200                                 |
| AS-17  | 5'-AGAAGCAAUUUCGUGU <u><b>A</b></u> AATT-3'   | 6747.964    | 6747.538    | 225,100                                 |
| AS-18  | 5'-AGAAGCAAUUUCGUGU <u><b>A</b></u> AATT-3'   | 6747.964    | 6748.060    | 225,100                                 |
| AS-19  | 5'-AGAAGCAAUUUCGUGU <u><b>A</b></u> AATT-3'   | 6747.964    | 6747.889    | 225,100                                 |
| AS-xA3 | 5'-AGAAGCAAUUUCGUGU <u><b>AAA</b></u> AATT-3' | 6847.995    | 6847.112    | 230,900                                 |
| AS-xU3 | 5'-AGAAGCAA <u><b>UUU</b></u> CGUGUAAATT-3'   | 6847.995    | 6847.865    | 195,200                                 |
| SS-U   | 5'-UUUACACGAAAUUGCUCU <u><b>U</b></u> TT-3'   | 6548.854    | 6547.617    | 203,000                                 |
| SS-A   | 5'-UUUACACGAAAUUGCUCU <u><b>A</b></u> TT-3'   | 6571.881    | 6571.755    | 207,500                                 |
| SS-xU  | 5'-UUUACACGAAAUUGCUCU <u><b>U</b></u> TT-3'   | 6598.870    | 6597.295    | 194,000                                 |
| SS-xA  | 5'-UUUACACGAAAUUGCUCU <u><b>A</b></u> TT-3'   | 6621.897    | 6620.700    | 210,400                                 |

**Table S1.** MALDI mass spectrometry data and calculated molar extinction coefficient values at 260 nm ( $\epsilon_{260}$ ) of synthesized siRNA strands. xRNA substitutions are displayed as bold and underlined nucleotides. Expected and observed molecular weights (MW) are shown. See Methods section in manuscript for  $\epsilon_{260}$  calculation protocol.

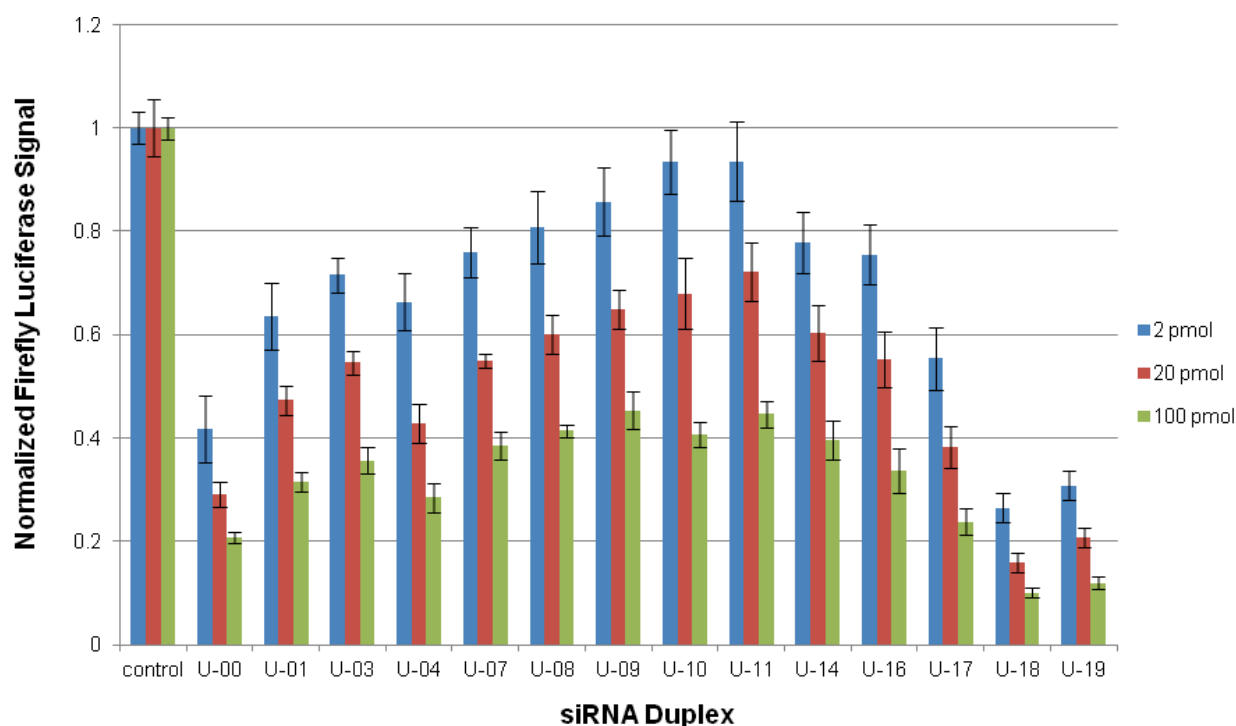

**Figure S2.** Normalized RNAi activity data set for siR-U series. U-00 corresponds to the unmodified siRNA duplex. Data are averages and s.d. of three independent experiments. HeLa cells were co-transfected with 2 pmol (3.33 nM), 20 pmol (33.3 nM) or 100 pmol (166 nM) of siRNA duplex. Decreased firefly luciferase signal indicates enhanced RNAi activity. Control groups contain HeLa cells treated with luciferase plasmids in the absence of siRNA.

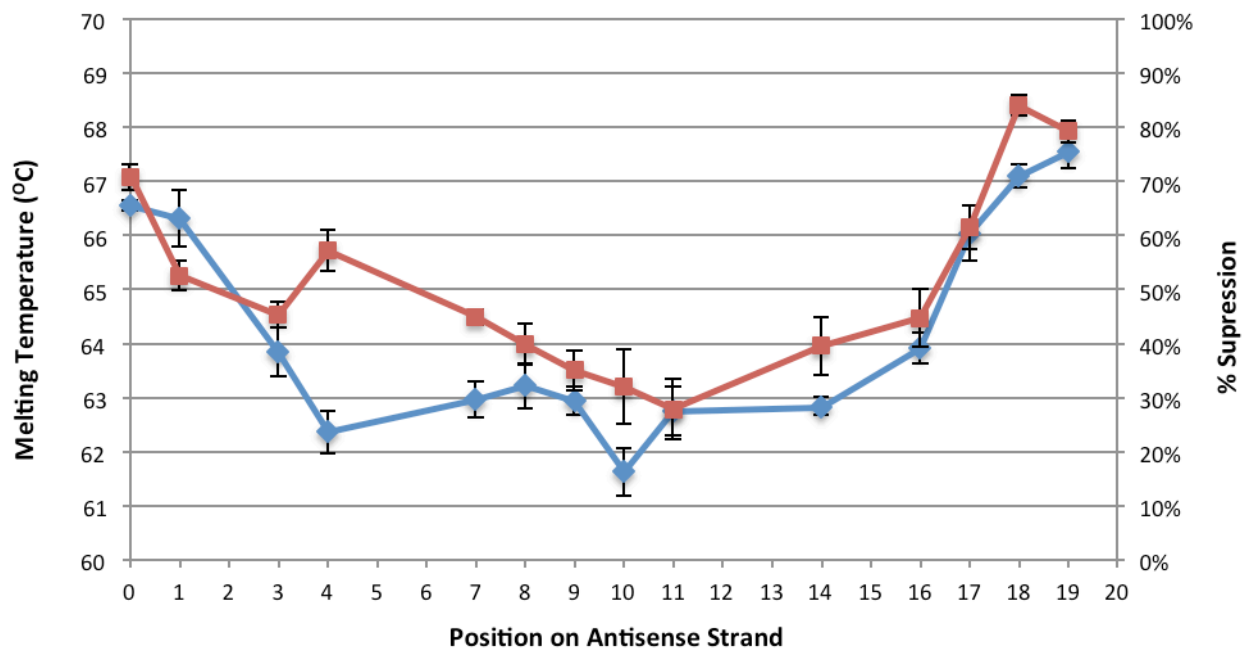

**Figure S3.** Plot of RNAi activity (red) and melting temperature ( $T_m$ , blue) for siR-U series. Data taken from Supplemental Figure S2 at 20 pmol siRNA (33.3 nM) and Figure 2C, respectively. Activity data was inverted and plotted as % suppression. Increased % suppression indicates enhanced RNAi activity. Data for siR-U-00 is shown at position 0.  $T_m$  error  $< \pm 0.5$  °C.

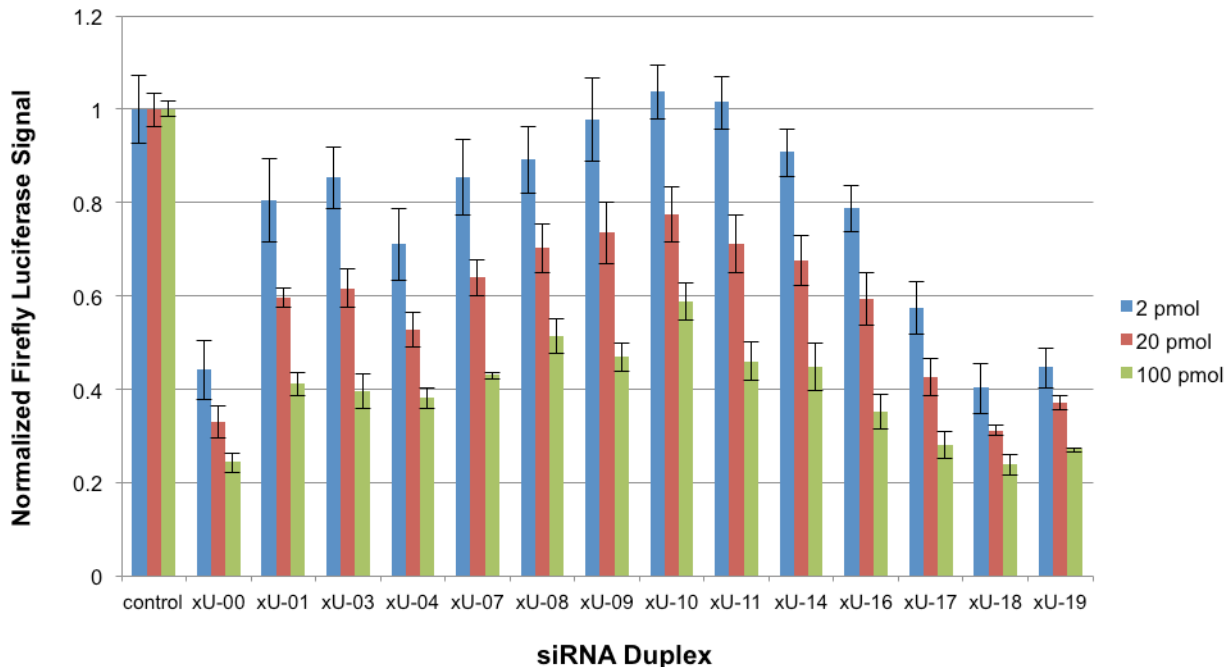

**Figure S4.** Normalized RNAi activity data set for siR-xU series. xU-00 corresponds to an siRNA duplex containing the unmodified antisense strand, AS-00. Data are averages and s.d. of three independent experiments. HeLa cells were co-transfected with 2 pmol (3.33 nM), 20 pmol (33.3 nM) or 100 pmol (166 nM) of siRNA duplex. Decreased firefly luciferase signal indicates enhanced RNAi activity. Control groups contain HeLa cells treated with luciferase plasmids in the absence of siRNA.

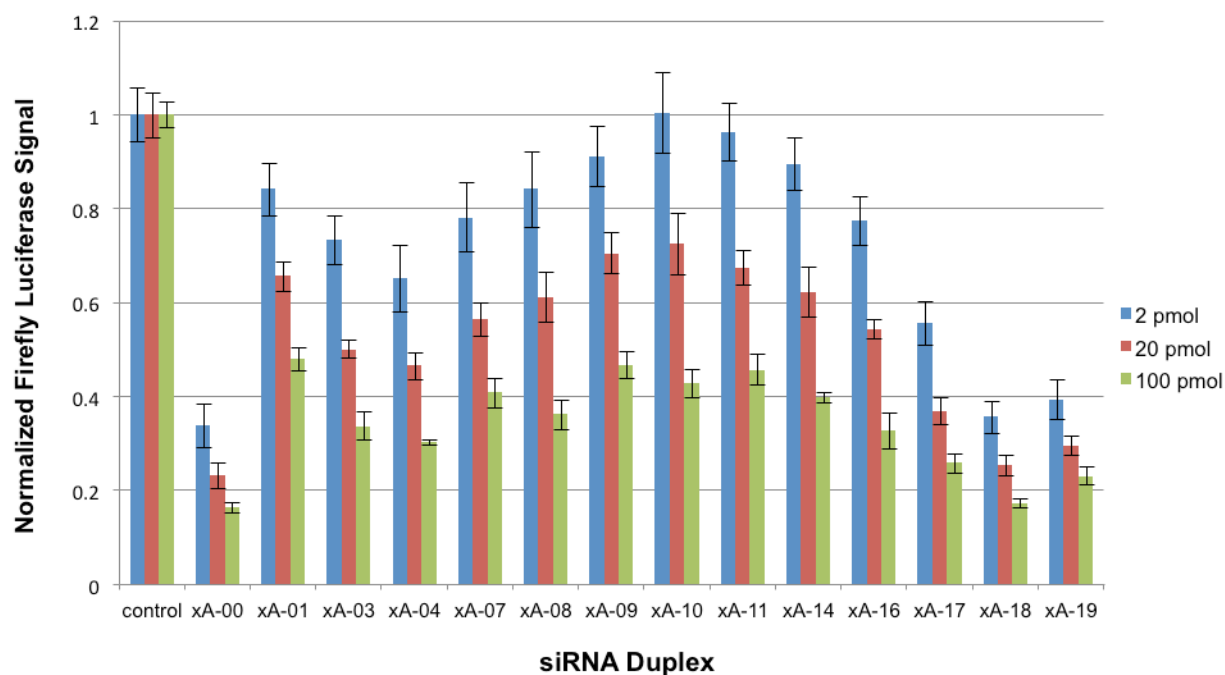

**Figure S5.** Normalized RNAi activity data set for siR-xA series. xA-00 corresponds to an siRNA duplex containing the unmodified antisense strand, AS-00. Data are averages and s.d. of three independent experiments. HeLa cells were co-transfected with 2 pmol (3.33 nM), 20 pmol (33.3 nM) or 100 pmol (166 nM) of siRNA duplex. Decreased firefly luciferase signal indicates enhanced RNAi activity. Control groups contain HeLa cells treated with luciferase plasmids in the absence of siRNA.

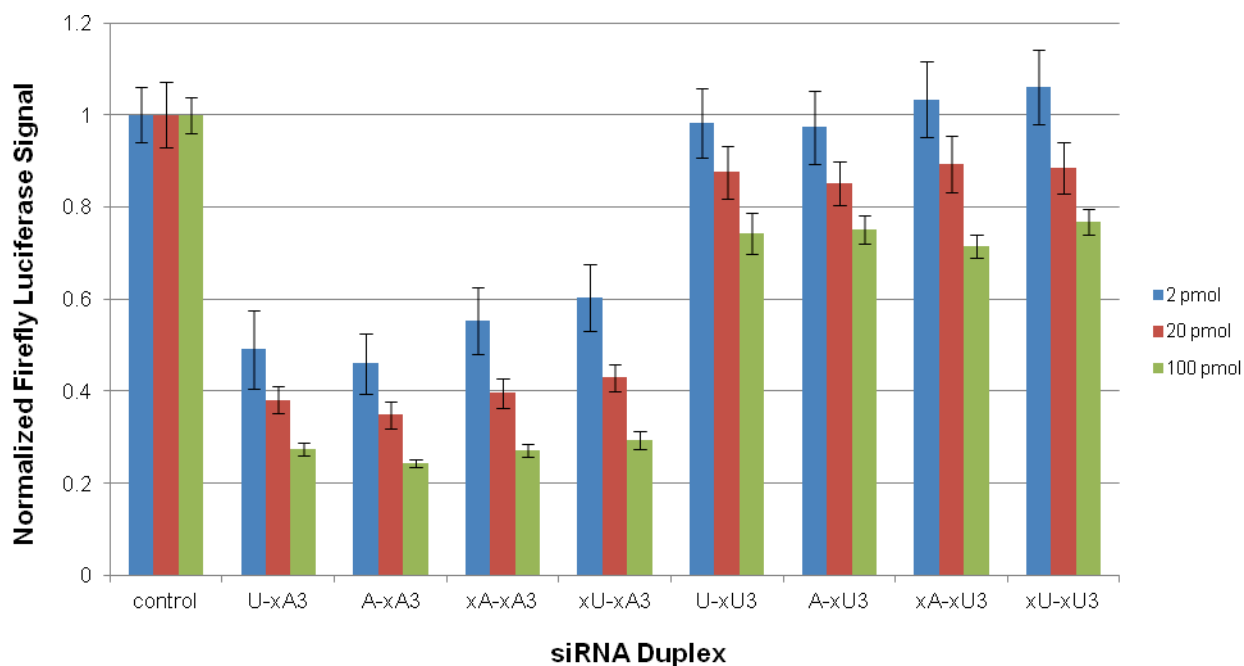

**Figure S6.** Normalized RNAi activity data set for si-xA3 and siR-xU3 series. Data are averages and s.d. of three independent experiments. HeLa cells were co-transfected with 2 pmol (3.33 nM), 20 pmol (33.3 nM) or 100 pmol (166 nM) of siRNA duplex. Decreased firefly luciferase signal indicates enhanced RNAi activity. Control groups contain HeLa cells treated with luciferase plasmids in the absence of siRNA.

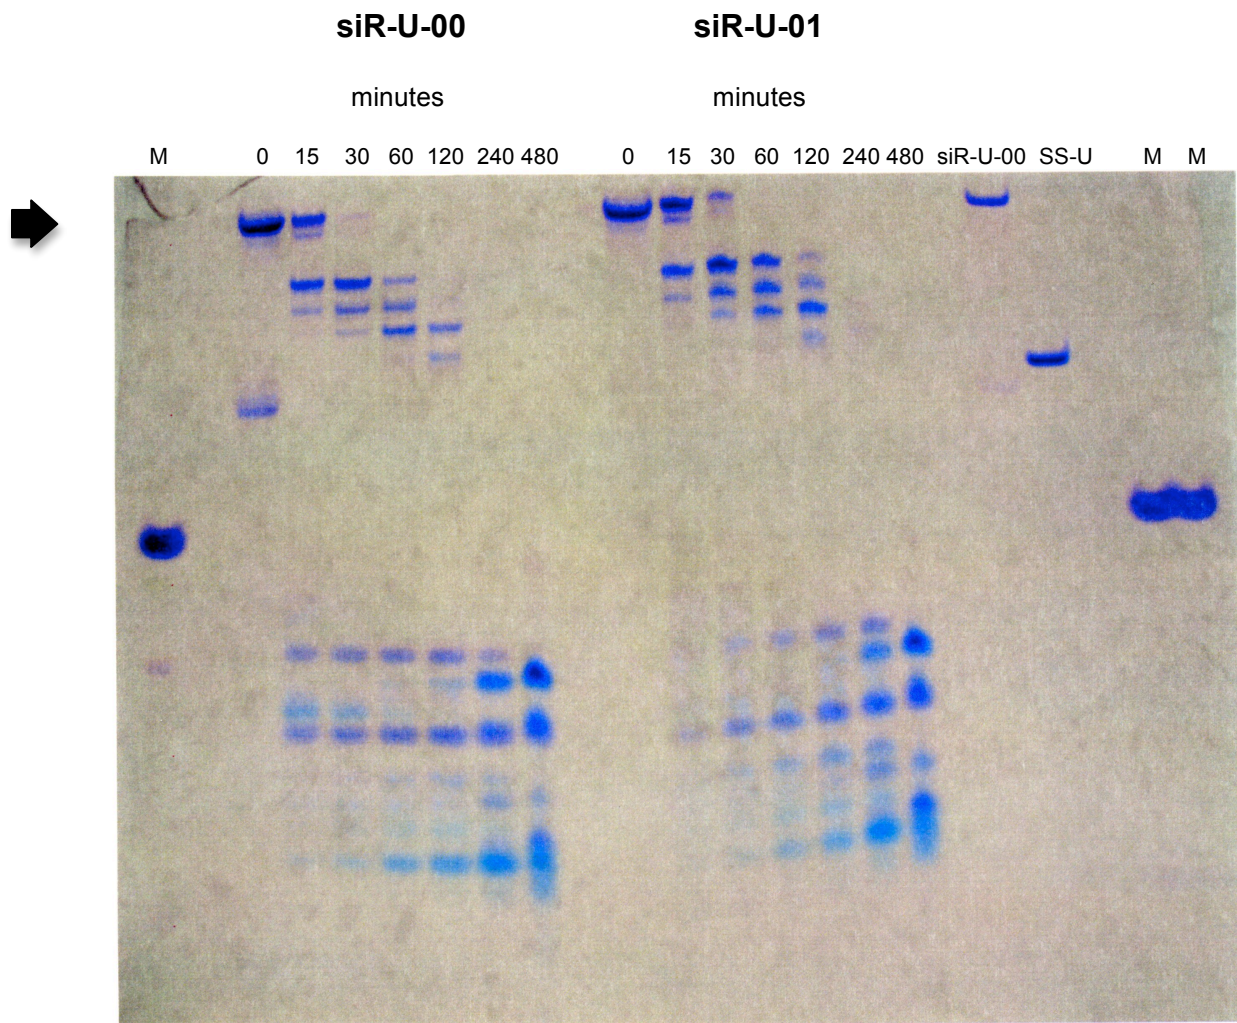

**Figure S7.** Serum stability data for siR-U-00 and siR-U-01 showing digestion of fully intact siRNA duplexes (black arrow) on a native PAGE gel (visualized by Stains-All staining). Samples of siR-U-00 and SS-U (both in the absence of human serum) were added to the gel to act as standardized markers indicating positions of fully intact siRNA and 21-nt oligoribonucleotide, respectively. “M” represents the marker dye bromophenol blue. Duplex analog sequences shown below (xRNA substitution shown in bold).

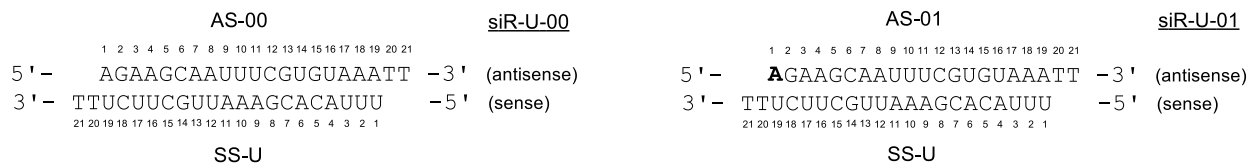



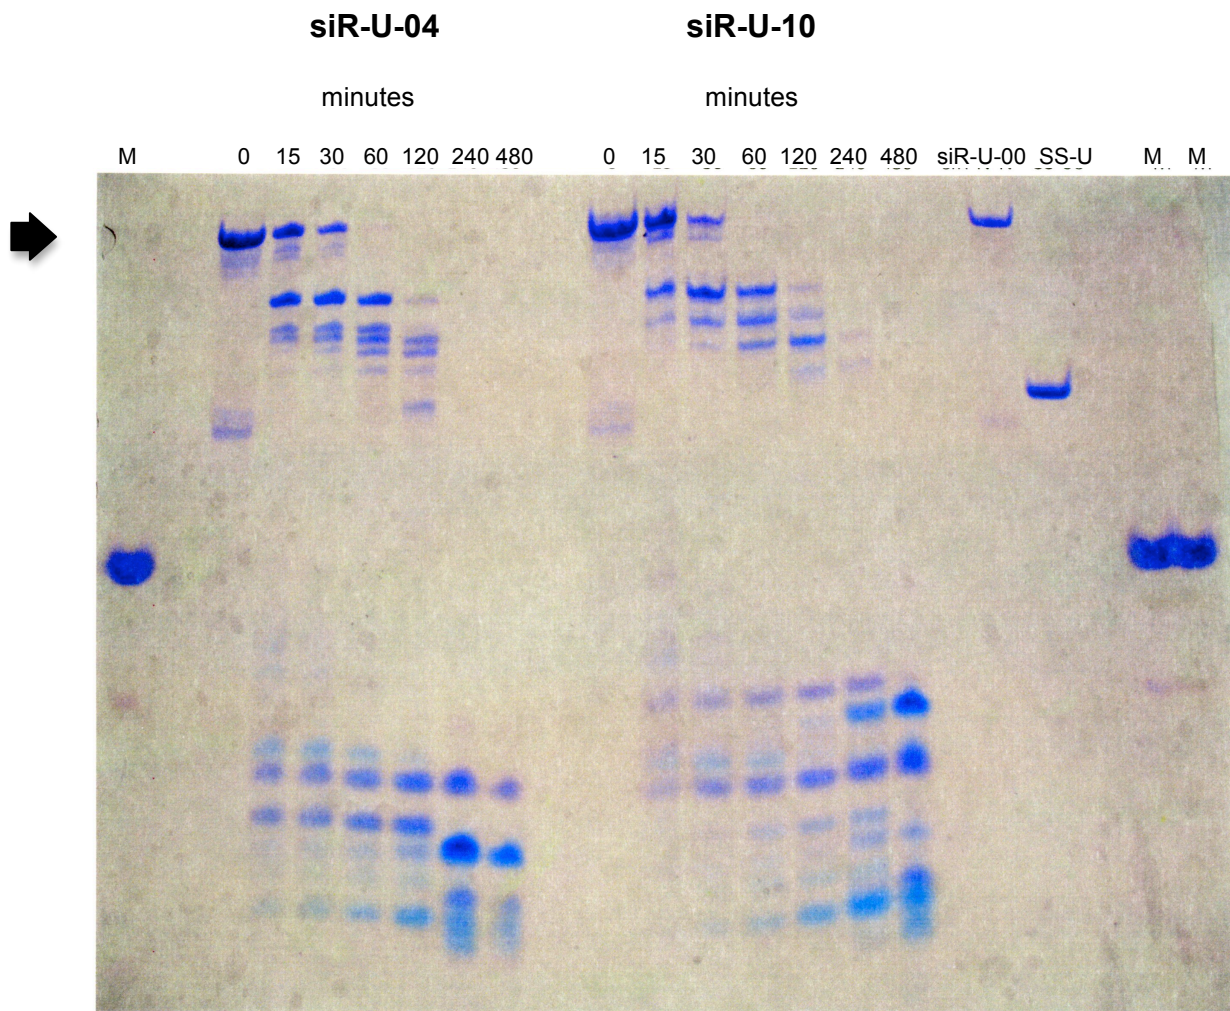

**Figure S8.** Serum stability data for siR-U-04 and siR-U-10 showing digestion of fully intact siRNA duplexes (black arrow) on a native PAGE gel (visualized by Stains-All staining). Samples of siR-U-00 and SS-U (both in the absence of human serum) were added to the gel to act as standardized markers indicating positions of fully intact siRNA and 21-nt oligoribonucleotide, respectively. “M” represents the marker dye bromophenol blue. Duplex analog sequences shown below (xRNA substitutions shown in bold).

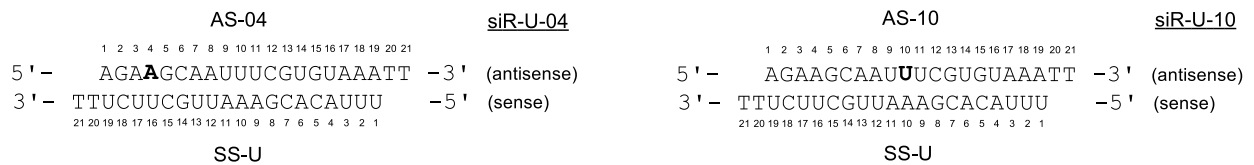

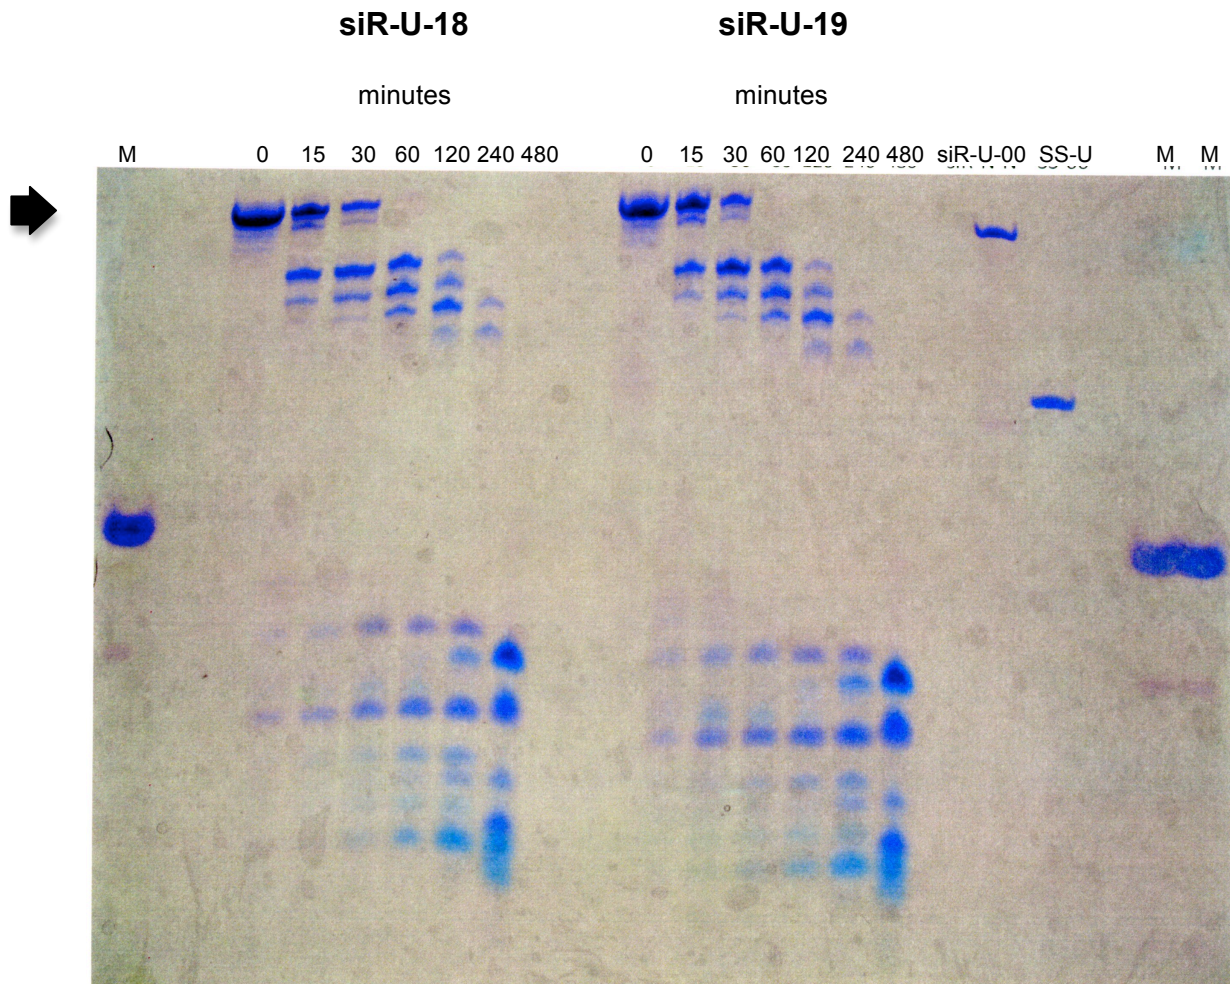

**Figure S9.** Serum stability data for siR-U-18 and siR-U-19 showing digestion of fully intact siRNA duplexes (black arrow) on a native PAGE gel (visualized by Stains-All staining). Samples of siR-U-00 and SS-U (both in the absence of human serum) were added to the gel to act as standardized markers indicating positions of fully intact siRNA and 21-nt oligoribonucleotide, respectively. “M” represents the marker dye bromophenol blue. Duplex analog sequences shown below (xRNA substitutions shown in bold).

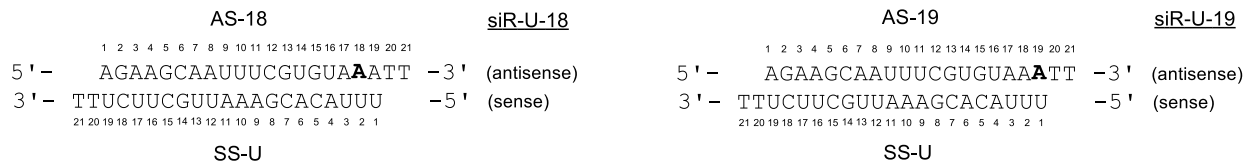



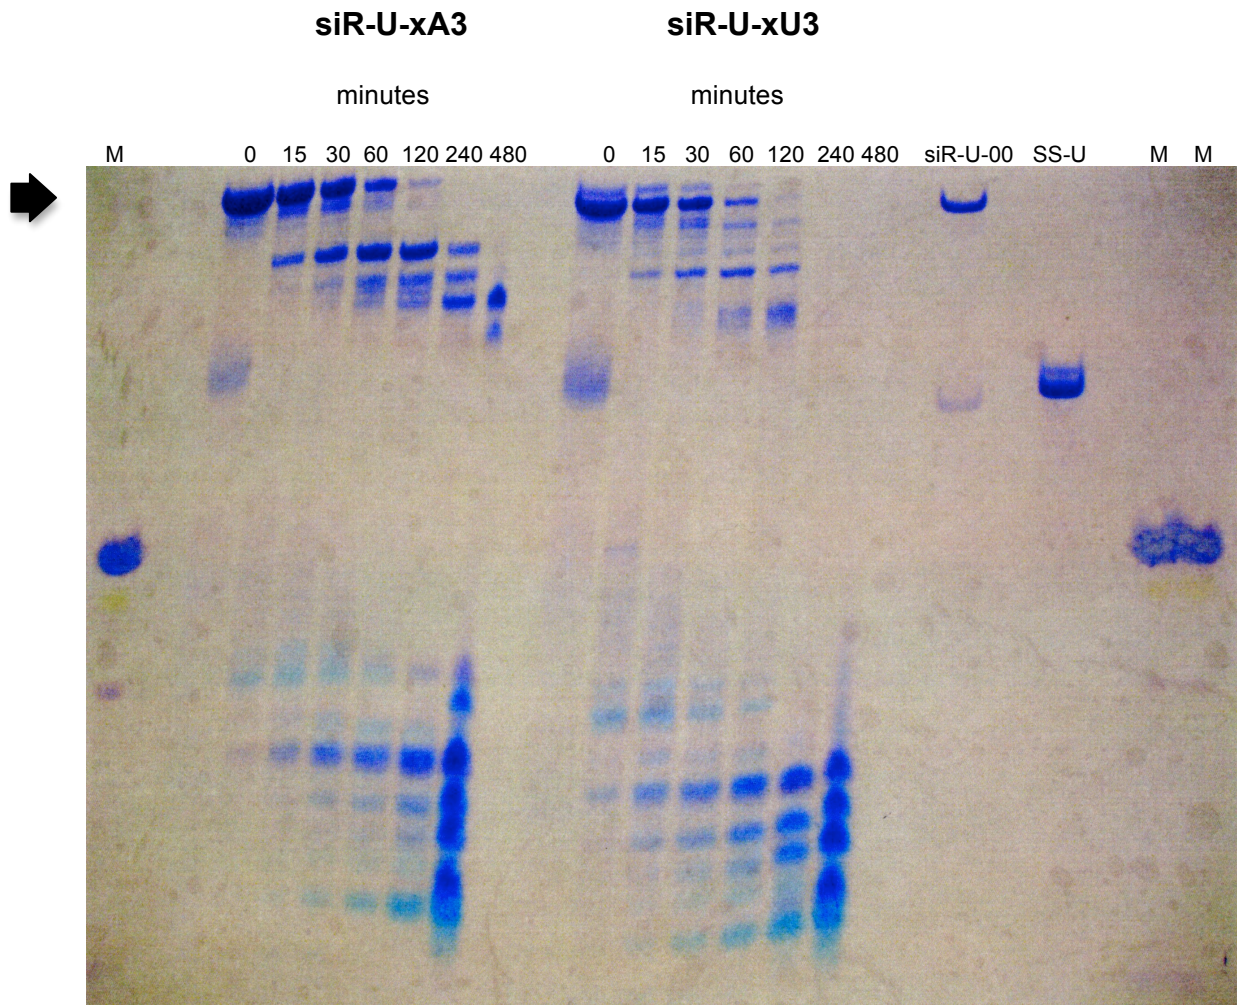

**Figure S10.** Serum stability data for siR-U-xA3 and siR-U-xU3 showing digestion of fully intact siRNA duplexes (black arrow) on a native PAGE gel (visualized by Stains-All staining). Samples of siR-U-00 and SS-U (both in the absence of human serum) were added to the gel to act as standardized markers indicating positions of fully intact siRNA and 21-nt oligoribonucleotide, respectively. “M” represents the marker dye bromophenol blue. Duplex analog sequences shown below (xRNA substitutions shown in bold).

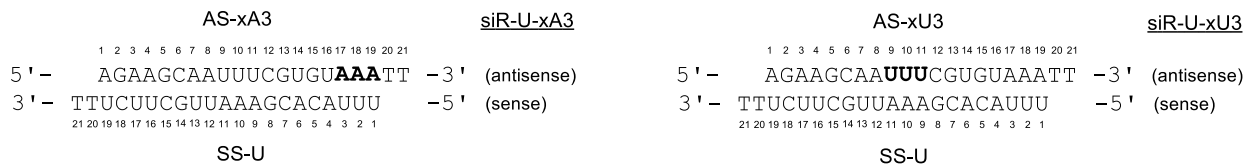

## Materials and Methods

Unless otherwise indicated, all reactions were carried out under an atmosphere of dry argon. Anhydrous solvents were purchased from Acros. Reagents were purchased from Sigma Aldrich and were used as received without further purification. <sup>1</sup>H-NMR, <sup>13</sup>C-NMR, gCOSY and gHMBC NMR spectra were taken on a 400 MHz Varian Mercury, 500 MHz Varian Inova or 600 MHz Varian Inova spectrophotometer. Chemical shifts are reported in ppm with the solvent resonance as the internal standard. Ribose and nucleobase proton assignments were made using gCOSY data. High-resolution mass spectrometry (HRMS) was performed at the Stanford University Mass Spectrometry Facility and were analyzed by LC/ESI-MS on a Waters Acquity UPLC and Thermo Fisher Exactive mass spectrometer.

**8-Amino-3-[3',5'-O-(di-tert-butylsilylene)-β-D-ribofuranosyl]-3H-imidazo[4,5-g]quinazoline (2).** To a solution of dried 8-amino-3-(β-D-ribofuranosyl)-3H-imidazo[4,5-g]quinazoline (1.28 g, 4.03 mmol) (**1**)<sup>1</sup> in 40 mL anhy. DMF stirring in ice bath, di-tert-butylsilyl bis(trifluoromethanesulfonate) (1.44 mL, 4.43 mmol) was added drop wise and allowed to stir in cold for 30 min., then 15 min. at r.t. Triethylamine (1.69 mL, 12.1 mmol) was then added to the reaction and reaction mixture was allowed to stir for an additional 15 min. Crude product was evaporated *in vacuo* and purified by silica column chromatography (5% methanol in CH<sub>2</sub>Cl<sub>2</sub>) to give **2** (1.57 g, 85%) as a pale yellow waxy solid. <sup>1</sup>H NMR (acetone-d<sub>6</sub>, 400 MHz): δ 8.66 (s, 1H, ArH), 8.58 (s, 1H, ArH), 8.55 (s, 1H, ArH), 7.97 (s, 1H, ArH), 7.29 (s br, 2H, ArNH<sub>2</sub>), 6.02 (d, *J* = 5.1 Hz, 1H, H(1')), 4.69-4.64 (m, 1H, H(2')), 4.56-4.51 (m, 1H, H(4')), 4.44-4.39 (m, 1H, H(3')), 4.35-4.24 (m, 2H, H<sub>ab</sub>(5')), 3.77 (s br, 1H, H(2'OH)), 1.10 (s, 9H, R<sub>2</sub>Si(C(CH<sub>3</sub>)<sub>3</sub>)<sub>2</sub>), 1.07 (s, 9H, R<sub>2</sub>Si(C(CH<sub>3</sub>)<sub>3</sub>)<sub>2</sub>). <sup>13</sup>C NMR (acetone-d<sub>6</sub>, 100 MHz): δ 167.49, 152.24, 147.48, 140.04, 130.94, 129.40, 123.74, 118.75, 116.20, 96.57, 80.17, 79.24, 76.96, 69.01, 27.25, 27.07, 26.93, 25.51, 22.32, 20.03. HRMS (M + H) calculated for C<sub>22</sub>H<sub>32</sub>O<sub>4</sub>N<sub>5</sub>Si: 458.2223; found: 458.2207.

**8-Amino-3-[2'-O-(tert-butyl dimethylsilyl)-3',5'-O-(di-tert-butylsilylene)-β-D-ribofuranosyl]-3H-imidazo[4,5-g]quinazoline (3).** To a solution of dried **2** (810 mg, 1.77 mmol) in 35 mL anhy. pyridine stirring at r.t., imidazole (1.80 g, 26.5 mmol) was added, followed by *tert*-butyl dimethylsilyl chloride (4 g, 26.5 mmol) after imidazole had completely dissolved. A precipitate formed in the reaction mixture about 5 min. after adding TBDMSCl. After stirring overnight at r.t., reaction mixture was evaporated to a syrup, then dissolved in CH<sub>2</sub>Cl<sub>2</sub>. Organic mixture was washed with dH<sub>2</sub>O followed by brine, dried over Na<sub>2</sub>SO<sub>4</sub>, filtered and evaporated *in vacuo*. Crude product was purified by silica column chromatography (3% methanol in CH<sub>2</sub>Cl<sub>2</sub>) to give **3** (890 mg, 88%) as a pale yellow foamy solid. <sup>1</sup>H NMR (acetone-d<sub>6</sub>, 400 MHz): δ 8.59 (s, 1H, ArH), 8.54 (s, 1H, ArH), 8.41 (s, 1H, ArH), 7.88 (s, 1H, ArH), 7.11 (s br, 2H, ArNH<sub>2</sub>), 6.21 (d, *J* = 5.5 Hz, 1H, H(1')), 4.84-4.81 (m, 1H, H(2')), 4.54-4.44 (m, 2H, H(3'), H(4')), 4.26-4.17 (m, 2H, H<sub>ab</sub>(5')), 1.12 (s, 9H, R<sub>2</sub>Si(C(CH<sub>3</sub>)<sub>3</sub>)<sub>2</sub>), 1.09 (s, 9H, R<sub>2</sub>Si(C(CH<sub>3</sub>)<sub>3</sub>)<sub>2</sub>), 0.95 (s, 9H, OSi(CH<sub>3</sub>)<sub>2</sub>(C(CH<sub>3</sub>)<sub>3</sub>)), 0.17 (s, 3H, OSi(CH<sub>3</sub>)<sub>2</sub>(C(CH<sub>3</sub>)<sub>3</sub>)), 0.16 (s, 3H, OSi(CH<sub>3</sub>)<sub>2</sub>(C(CH<sub>3</sub>)<sub>3</sub>)). <sup>13</sup>C NMR (acetone-d<sub>6</sub>, 100 MHz): δ 166.99, 157.41, 154.23, 147.82, 145.94, 143.70, 138.03, 118.34, 116.50, 105.85, 93.17, 76.87, 75.64, 74.72, 67.69, 40.69, 34.58, 27.43, 27.27, 26.92, 25.73, 22.60, 20.34, 19.98, 18.31, -4.49, -5.43. HRMS (M + H) calculated for C<sub>28</sub>H<sub>46</sub>O<sub>4</sub>N<sub>5</sub>Si<sub>2</sub>: 572.3088; found: 572.3074.

**3-[2'-O-(tert-Butyl dimethylsilyl)-3',5'-O-(di-tert-butylsilylene)-β-D-ribofuranosyl]-8-N-(dimethylacet-amido)-3H-imidazo[4,5-g]quinazoline (4).** To a solution of dried **3** (1.68 g, 2.94 mmol) in 30 mL anhy. methanol stirring at r.t., *N,N*-dimethylacetamide dimethyl acetal (5.16 mL, 35.3 mmol) was added. After stirring at r.t. for 12 h, reaction mixture was evaporated *in vacuo*. Crude product was purified by silica column chromatography (1% methanol in CH<sub>2</sub>Cl<sub>2</sub>) to give **4** (1.70 g, 90%) as a pale yellow foam. <sup>1</sup>H NMR (CDCl<sub>3</sub>, 400 MHz): δ 8.77 (s, 1H, ArH), 8.64 (s, 1H, ArH), 8.11 (s, 1H, ArH), 7.77 (s, 1H, ArH), 5.93 (d, *J* = 4.3 Hz, 1H, H(1')), 4.51-4.45 (m, 1H, H(4')), 4.41-4.38 (m, 1H, H(2')), 4.23-4.12 (m, 2H, H<sub>a</sub>(5'), H(3')), 4.06-4.00 (m, 1H, H<sub>b</sub>(5')), 3.22 (s br, 3H, ArN=C(CH<sub>3</sub>)N(CH<sub>3</sub>)<sub>2</sub>), 3.12 (s br, 3H, ArN=C(CH<sub>3</sub>)N(CH<sub>3</sub>)<sub>2</sub>), 2.20 (s, 3H, ArN=C(CH<sub>3</sub>)N(CH<sub>3</sub>)<sub>2</sub>), 1.03 (s, 9H, R<sub>2</sub>Si(C(CH<sub>3</sub>)<sub>3</sub>)<sub>2</sub>), 1.00



(s, 9H,  $\text{R}_2\text{Si}(\text{C}(\text{CH}_3)_3)_2$ ), 0.87 (s, 9H,  $\text{OSi}(\text{CH}_3)_2(\text{C}(\text{CH}_3)_3)$ ), 0.067 (s, 6H,  $\text{OSi}(\text{CH}_3)_2(\text{C}(\text{CH}_3)_3)$ );  $^{13}\text{C}$  NMR ( $\text{CDCl}_3$ , 100 MHz):  $\delta$  167.33, 161.33, 154.56, 146.93, 144.48, 143.14, 136.92, 118.49, 117.17, 105.64, 93.12, 76.58, 75.34, 74.30, 67.57, 38.39, 38.14, 27.34, 26.89, 25.72, 22.64, 20.26, 20.24, 18.10, 16.65, -4.22, -5.08. HRMS (M + H) calculated for  $\text{C}_{32}\text{H}_{53}\text{O}_4\text{N}_6\text{Si}_2$ : 641.5467; found: 641.3653.

**3-[2'-O-(tert-Butyldimethylsilyl)- $\beta$ -D-ribofuranosyl]-8-N-(dimethylacetamido)-3H-imidazo[4,5-g]quinazoline (5).** To an oven-dried round-bottom flask purged with argon, a solution of 1.6 mL HF-pyridine in 1.8 mL anhy. pyridine was *carefully* made and allowed to stir in ice bath. A solution of dried **4** (1.52 g, 2.38 mmol) in 35 mL anhy. THF was prepared and allowed to stir at  $0^\circ\text{C}$ . Diluted HF-pyridine solution was *carefully* added to the latter solution drop wise and was allowed to stir at r.t. for 15 min., then diluted with 8 ml of pyridine followed by  $\text{CH}_2\text{Cl}_2$ . Organic mixture was washed with 5% aq.  $\text{NaHCO}_3$  followed by brine, dried over  $\text{Na}_2\text{SO}_4$ , filtered and evaporated *in vacuo*. Crude product was purified silica column chromatography (4% methanol in  $\text{CH}_2\text{Cl}_2$ ) to give **5** (1.52 g, 87%) as a pale yellow foam.  $^1\text{H}$  NMR ( $\text{CDCl}_3$ , 400 MHz):  $\delta$  8.72 (s, 1H, ArH), 8.63 (s, 1H, ArH), 8.38 (s, 1H, ArH), 8.33 (s, 1H, ArH), 5.92 (d,  $J = 7.0$  Hz, 1H, H(1')), 4.77 (t,  $J = 6.5$  Hz, 1H, H(2')), 4.43-4.38 (m, 1H, H(3')), 4.34-4.30 (m, 1H, H(4')), 4.09 (dd,  $J = 8.3, 2.8$  Hz, 1H,  $\text{H}_a(5')$ ), 3.95 (dd,  $J = 8.0, 2.8$  Hz, 1H,  $\text{H}_b(5')$ ), 3.26 (s br, 3H,  $\text{ArN}=\text{C}(\text{CH}_3)\text{N}(\text{CH}_3)_2$ ), 3.16 (s br, 3H,  $\text{ArN}=\text{C}(\text{CH}_3)\text{N}(\text{CH}_3)_2$ ), 2.24 (s, 3H,  $\text{ArN}=\text{C}(\text{CH}_3)\text{N}(\text{CH}_3)_2$ ), 0.75 (s, 9H,  $\text{OSi}(\text{CH}_3)_2(\text{C}(\text{CH}_3)_3)$ ), -0.22 (s, 3H,  $\text{OSi}(\text{CH}_3)_2(\text{C}(\text{CH}_3)_3)$ ), -0.43 (s, 3H,  $\text{OSi}(\text{CH}_3)_2(\text{C}(\text{CH}_3)_3)$ );  $^{13}\text{C}$  NMR ( $\text{CDCl}_3$ , 100 MHz):  $\delta$  167.86, 162.12, 154.27, 146.73, 143.81, 137.39, 118.57, 117.12, 107.38, 90.32, 86.06, 75.05, 71.79, 62.24, 38.63, 25.78, 18.09, 17.19, -5.10, -5.12. HRMS (M + H) calculated for  $\text{C}_{24}\text{H}_{37}\text{O}_4\text{N}_6\text{Si}$ : 501.2645; found: 501.2631.

**3-[2'-O-(tert-Butyldimethylsilyl)-5'-O-(4,4'-dimethoxytrityl)- $\beta$ -D-ribofuranosyl]-8-N-(dimethylacetamido)-3H-imidazo[4,5-g]quinazoline (6).** To a solution of dried **5** (1.17 g, 2.34 mmol) and DMAP (57.2 mg, 0.468 mmol) in 45 mL anhy. pyridine, 4,4'-dimethoxytrityl chloride (2.38 g, 7.02 mmol) was added in one portion and allowed to stir at r.t. At 12 h, TLC indicated that reaction was complete. Reaction mixture was quenched with 0.5 mL methanol and evaporated *in vacuo* to form a gum. Residue was dissolved in EtOAc and washed with 5% aq.  $\text{NaHCO}_3$ , followed by water and brine. Crude product in organic layer was dried over  $\text{Na}_2\text{SO}_4$ , evaporated *in vacuo* and purified by silica column chromatography (0 - 3% methanol in  $\text{CH}_2\text{Cl}_2$ ) to give **6** (1.57 g, 86%) as a pale yellow foam.  $^1\text{H}$  NMR ( $\text{CDCl}_3$ , 400 MHz):  $\delta$  8.78 (s, 1H, ArH), 8.68 (s, 1H, ArH), 8.39 (s, 1H, ArH), 7.89 (s, 1H, ArH), 7.47-7.17 (m, 9H, ArH), 6.86-6.76 (m, 4H, ArH), 6.02 (d,  $J = 6.4$  Hz, 1H, H(1')), 4.72 (t,  $J = 5.8$  Hz, 1H, H(2')), 4.35-4.31 (m, 1H, H(4')), 4.30-4.26 (m, 1H, H(3')), 3.76 (s, 6H,  $\text{R}(\text{ArOCH}_3)_2$ ), 3.53 (dd,  $J = 8.2, 3.0$  Hz, 1H,  $\text{H}_a(5')$ ), 3.44 (dd,  $J = 7.4, 3.5$  Hz, 1H,  $\text{H}_b(5')$ ), 3.28 (s br, 3H,  $\text{ArN}=\text{C}(\text{CH}_3)\text{N}(\text{CH}_3)_2$ ), 3.18 (s br, 3H,  $\text{ArN}=\text{C}(\text{CH}_3)\text{N}(\text{CH}_3)_2$ ), 2.93 (s br, 1H, OH(3')), 2.28 (s, 3H,  $\text{ArN}=\text{C}(\text{CH}_3)\text{N}(\text{CH}_3)_2$ ), 0.79 (s, 9H,  $\text{OSi}(\text{CH}_3)_2(\text{C}(\text{CH}_3)_3)$ ), -0.14 (s, 3H,  $\text{OSi}(\text{CH}_3)_2(\text{C}(\text{CH}_3)_3)$ ), -0.33 (s, 3H,  $\text{OSi}(\text{CH}_3)_2(\text{C}(\text{CH}_3)_3)$ );  $^{13}\text{C}$  NMR ( $\text{CDCl}_3$ , 100 MHz):  $\delta$  158.50, 153.77, 146.51, 144.84, 144.37, 143.05, 137.92, 135.29, 129.99, 129.97, 127.92, 126.93, 118.25, 117.07, 113.21, 105.20, 88.55, 86.76, 84.22, 71.76, 63.63, 55.12, 38.54, 25.43, 17.76, 16.89, -5.25, -5.43. HRMS (M + H) calculated for  $\text{C}_{45}\text{H}_{55}\text{O}_6\text{N}_6\text{Si}$ : 803.3952; found: 803.3933.

**3-[2'-O-(tert-Butyldimethylsilyl)-3'-O-(2-cyanoethyl-N,N-diisopropylphosphino)-5'-O-(4,4'-dimethoxytrityl)- $\beta$ -D-ribofuranosyl]-8-N-(dimethylacetamido)-3H-imidazo[4,5-g]quinazoline (7).** To a solution of **6** (100 mg, 0.125 mmol), 1-methylimidazole (8  $\mu\text{L}$ , 0.100 mmol) and *N,N*-diisopropylethylamine (76  $\mu\text{L}$ , 0.438 mmol) in 5 mL anhy.  $\text{CH}_2\text{Cl}_2$  stirring at  $0^\circ\text{C}$ , 2-cyanoethyl *N,N*-diisopropylchlorophosphoramidite (34  $\mu\text{L}$ , 0.150 mmol) was added drop wise and the reaction mixture was allowed to stir at r.t. while monitored by TLC. At 6 h, the reaction was complete by TLC and the mixture was quenched with 5% aq.  $\text{NaHCO}_3$ . Organic layer was dried under  $\text{MgSO}_4$  and evaporated *in vacuo*. Crude product was purified by silica column chromatography (0 - 2% methanol in  $\text{CH}_2\text{Cl}_2$  with 1%  $\text{Et}_3\text{N}$ ) to give **7** (109 mg, 87%) as a pale yellow foam.  $^{31}\text{P}$  NMR ( $\text{CDCl}_3$ , 162 MHz):  $\delta$  152.880, 149.550. HRMS (M + H) calculated for  $\text{C}_{54}\text{H}_{72}\text{N}_8\text{O}_7\text{SiP}$ : 1003.4953; found: 1003.5052.

**8-[3',5'-O-(di-*tert*-butylsilylene)- $\beta$ -D-ribofuranosyl]-quinazoline-2,4(1*H*,3*H*)-dione (9).** To a solution of dried 8-( $\beta$ -D-ribofuranosyl)-quinazoline-2,4(1*H*,3*H*)-dione (443 mg, 1.50 mmol) (**8**)<sup>1</sup> in 10 mL anhy. DMF stirring in ice bath, di-*tert*-butylsilyl bis(trifluoromethanesulfonate) (535  $\mu$ L, 1.65 mmol) was added drop wise and allowed to stir in cold for 30 min., then 15 min. at r.t. Triethylamine (0.63 mL, 4.5 mmol) was then added to the mixture and reaction was allowed to stir for an additional 15 min. Crude product was evaporated *in vacuo* and purified by silica column chromatography (5% methanol in CH<sub>2</sub>Cl<sub>2</sub>) to give **9** (464 mg, 71%) as a pale yellow waxy solid. <sup>1</sup>H NMR (DMSO-d<sub>6</sub>, 400 MHz):  $\delta$  9.93 (s br, 1H ArNH), 7.85 (d, *J* = 7.7 Hz, 1H, ArH), 7.62 (d, *J* = 7.7 Hz, 1H, ArH), 7.18 (t, *J* = 7.7 Hz, 1H, ArH), 5.74 (s br, 1H, OH(2')), 5.24 (d, *J* = 6.8 Hz, 1H, H(1')), 4.46-4.42 (m, 1H, H(3')), 4.10-4.01 (m, 3H, H(2')), H(4'), H<sub>a</sub>(5')), 3.81-3.76 (m, 1H, H<sub>b</sub>(5')), 0.97 (s, 9H, R<sub>2</sub>Si(C(CH<sub>3</sub>)<sub>3</sub>)<sub>2</sub>), 0.95 (s, 9H, R<sub>2</sub>Si(C(CH<sub>3</sub>)<sub>3</sub>)<sub>2</sub>); <sup>13</sup>C NMR (DMSO-d<sub>6</sub>, 100 MHz):  $\delta$  162.63, 150.25, 137.22, 131.53, 126.55, 126.11, 122.27, 114.93, 82.88, 76.67, 73.63, 67.37, 27.34, 27.24, 27.03, 26.77, 22.26, 20.08. HRMS (M + H) calculated for C<sub>21</sub>H<sub>31</sub>O<sub>6</sub>N<sub>2</sub>Si: 435.1951; found: 435.1940.

**8-[2'-O-(*tert*-butyldimethylsilyl)-3',5'-O-(di-*tert*-butylsilylene)- $\beta$ -D-ribofuranosyl]-quinazoline-2,4(1*H*,3*H*)-dione (10).** To a solution of dried **9** (435 mg, 1.00 mmol) in 10 mL anhy. pyridine stirring at r.t., imidazole (1.02 g, 15.0 mmol) was added, followed by *tert*-butyldimethylsilyl chloride (2.26 g, 15.0 mmol) after imidazole had completely dissolved. A precipitate formed in the reaction mixture about 5 min. after adding TBDMSCl. After stirring overnight at r.t., reaction mixture was evaporated to a syrup, then dissolved in CH<sub>2</sub>Cl<sub>2</sub>. Organic mixture was washed with dH<sub>2</sub>O followed by brine, dried over Na<sub>2</sub>SO<sub>4</sub>, filtered and evaporated *in vacuo*. Crude product was purified by silica column chromatography (0 - 2% methanol in CH<sub>2</sub>Cl<sub>2</sub>) to give **10** (490 mg, 89%) as a pale yellow foamy solid. <sup>1</sup>H NMR (CDCl<sub>3</sub>, 500 MHz):  $\delta$  9.98 (s br, 1H, ArNH), 9.31, (s br, 1H, ArNH), 8.12 (d, *J* = 7.8 Hz, 1H, ArH), 7.50 (d, *J* = 7.8 Hz, 1H, ArH), 7.20 (t, *J* = 7.6 Hz, 1H, ArH), 5.13 (d, *J* = 6.3 Hz, 1H, H(1')), 4.55-4.50 (m, 1H, H(4')), 4.40-4.37 (m, 1H, H(2')), 4.12-4.07 (m, 1H, H<sub>a</sub>(5')), 4.04-3.98 (m, 1H, H<sub>b</sub>(5')), 3.91-3.86 (m, 1H, H(3')), 1.04 (s, 9H, R<sub>2</sub>Si(C(CH<sub>3</sub>)<sub>3</sub>)<sub>2</sub>), 1.03 (s, 9H, R<sub>2</sub>Si(C(CH<sub>3</sub>)<sub>3</sub>)<sub>2</sub>), 0.91 (s, 9H, OSi(CH<sub>3</sub>)<sub>2</sub>(C(CH<sub>3</sub>)<sub>3</sub>)), 0.12 (s, 3H, OSi(CH<sub>3</sub>)<sub>2</sub>(C(CH<sub>3</sub>)<sub>3</sub>)), 0.087 (s, 3H, OSi(CH<sub>3</sub>)<sub>2</sub>(C(CH<sub>3</sub>)<sub>3</sub>)); <sup>13</sup>C NMR (CDCl<sub>3</sub>, 100 MHz):  $\delta$  162.92, 149.88, 138.09, 132.30, 128.20, 123.80, 122.80, 115.73, 88.78, 77.47, 75.86, 74.98, 67.63, 27.40, 26.98, 25.82, 25.60, 22.62, 20.25, 18.09, 17.91, -3.68, -3.95, -5.07. HRMS (M + H) calculated for C<sub>27</sub>H<sub>45</sub>O<sub>6</sub>N<sub>2</sub>Si<sub>2</sub>: 549.2816; found: 549.2811.

**8-[2'-O-(*tert*-butyldimethylsilyl)- $\beta$ -D-ribofuranosyl]-quinazoline-2,4(1*H*,3*H*)-dione (11).** To an oven-dried round-bottom flask purged with argon, a solution of 0.63 mL HF-pyridine in 0.72 mL anhy. pyridine was *carefully* made and allowed to stir in an ice bath. A solution of dried **10** (500 mg, 0.911 mmol) in 15 mL of anhydrous THF was prepared and allowed to stir at 0°C. Diluted HF-pyridine solution was *carefully* added to the latter solution drop wise and was allowed to stir at r.t. for 15 min., then diluted with 3 ml of pyridine followed by CH<sub>2</sub>Cl<sub>2</sub>. Organic mixture was washed with 5% aq. NaHCO<sub>3</sub> followed by brine, dried over Na<sub>2</sub>SO<sub>4</sub>, filtered and evaporated *in vacuo*. Crude product was purified on silica column chromatography (3% methanol in CH<sub>2</sub>Cl<sub>2</sub>) to give **11** (319 mg, 86%) as a pale yellow foam. <sup>1</sup>H NMR (acetone-d<sub>6</sub>, 400 MHz):  $\delta$  10.58 (s br, 1H, ArNH), 10.45 (s br, 1H, ArNH), 8.06 (d, *J* = 7.8 Hz, 1H, ArH), 7.62 (d, *J* = 7.8 Hz, 1H, ArH), 7.23 (d, *J* = 7.8 Hz, 1H, ArH), 4.92 (d, *J* = 7.9 Hz, 1H, H(1')), 4.43-4.39 (m, 1H, H(2')), 4.28-4.35 (m, 1H, H(3')), 4.23-4.21 (m, 1H, H(4')), 3.97-3.93 (m, 2H, H<sub>ab</sub>(5')), 3.78 (s br, 1H, OH(3')), 0.78 (s, 9H, OSi(CH<sub>3</sub>)<sub>2</sub>(C(CH<sub>3</sub>)<sub>3</sub>)), -0.15 (s, 3H, OSi(CH<sub>3</sub>)<sub>2</sub>(C(CH<sub>3</sub>)<sub>3</sub>)), -0.34 (s, 3H, OSi(CH<sub>3</sub>)<sub>2</sub>(C(CH<sub>3</sub>)<sub>3</sub>)); <sup>13</sup>C NMR (acetone-d<sub>6</sub>, 100 MHz):  $\delta$  163.49, 150.94, 139.93, 136.94, 128.59, 124.89, 122.78, 116.54, 87.55, 84.51, 76.44, 73.81, 62.64, 18.51, -5.19, -5.36. HRMS (M + H) calculated for C<sub>19</sub>H<sub>29</sub>O<sub>6</sub>N<sub>2</sub>Si: 409.1795; found: 409.1789.

**8-[2'-O-(*tert*-butyldimethylsilyl)-5'-O-(4,4'-dimethoxytrityl)- $\beta$ -D-ribofuranosyl]-quinazoline-2,4(1*H*,3*H*)-dione (12).** To a solution of dried **11** (300 mg, 0.734 mmol) and 2,6-di-*tert*-butylpyridine (810  $\mu$ L, 3.64 mmol) in 10 mL anhy. CH<sub>3</sub>CN, silver nitrate (125 mg, 0.734 mmol) was added in one portion and allowed to stir at r.t. until fully dissolved. To this mixture, 4,4'-dimethoxytrityl chloride (300 mg, 0.881 mmol) was added in one portion and allowed to stir at r.t. for 20 min. Mixture was then filtered into 5 mL of 5% aq. NaHCO<sub>3</sub> and partitioned with CH<sub>2</sub>Cl<sub>2</sub>. Organic layer was dried over Na<sub>2</sub>SO<sub>4</sub>

and evaporated *in vacuo*. Crude product was purified by silica column chromatography (0 - 2 % methanol in CH<sub>2</sub>Cl<sub>2</sub>) to give **12** (428 mg, 82%) as a pale yellow foam. <sup>1</sup>H NMR (CDCl<sub>3</sub>, 400 MHz): δ 9.49 (s br, 1H, ArNH), 9.11 (s br, 1H, ArNH), 8.16 (d, *J* = 7.7 Hz, 1H, ArH), 7.74 (d, *J* = 7.7 Hz, 1H, ArH), 7.46-7.16 (m, 9H, ArH), 6.84-6.78 (m, 4H, ArH), 5.06 (d, *J* = 8.5 Hz, 1H, H(1')), 4.35-4.30 (m, 1H, H(2')), 4.29-4.26 (m, 1H, H(4')), 4.02-3.98 (m, 1H, H(3')), 3.78 (s, 6H, R(ArOCH<sub>3</sub>)<sub>2</sub>), 3.63 (dd, *J* = 8.3, 2.6 Hz, 1H, H<sub>a</sub>(5')), 3.37 (dd, *J* = 8.0, 2.5 Hz, 1H, H<sub>b</sub>(5')), 2.93 (s br, 1H, OH(3')), 0.83 (s, 9H, OSi(CH<sub>3</sub>)<sub>2</sub>(C(CH<sub>3</sub>)<sub>3</sub>)), -0.10 (s, 3H, OSi(CH<sub>3</sub>)<sub>2</sub>(C(CH<sub>3</sub>)<sub>3</sub>)), -0.18 (s, 3H, OSi(CH<sub>3</sub>)<sub>2</sub>(C(CH<sub>3</sub>)<sub>3</sub>)); <sup>13</sup>C NMR (CDCl<sub>3</sub>, 100 MHz): δ 162.76, 158.52, 149.37, 144.57, 138.31, 135.58, 135.39, 133.55, 130.13, 130.15, 128.04, 127.80, 126.85, 124.00, 122.85, 115.21, 113.12, 86.72, 85.63, 79.81, 78.01, 76.67, 72.75, 63.42, 55.18, 25.57, 17.91, -5.22, -5.25. HRMS (M + Na) calculated for C<sub>40</sub>H<sub>46</sub>O<sub>8</sub>N<sub>2</sub>NaSi: 733.2921; found: 733.2907.

**8-[2'-O-(tert-butylidimethylsilyl)-3'-O-(2-cyanoethyl-*N,N*-diisopropylphosphino)-5'-O-(4,4'-dimethoxytrityl)-β-D-ribofuranosyl]-quinazoline-2,4(1*H*,3*H*)-dione (13).** To a solution of dried **12** (125 mg, 0.176 mmol) in 5 mL anhy. CH<sub>3</sub>CN, pyridinium trifluoroacetate (37.5 mg, 0.194 mmol) was added in one portion and allowed to stir at r.t. until fully dissolved. To this solution, 2-cyanoethyl *N,N,N',N'*-tetraisopropylphosphordiamidite (84 μL, 0.264 mmol) was added drop wise and the reaction mixture was allowed to stir at r.t. while monitored by TLC. At 18 h, the reaction was complete by TLC and the mixture was evaporated *in vacuo*. Crude product was purified by silica column chromatography (4:1 hexanes:ethyl acetate with 1% Et<sub>3</sub>N) to give **13** (148 mg, 92%) as a white foam. <sup>31</sup>P NMR (CDCl<sub>3</sub>, 162 MHz): δ 151.651, 147.736. HRMS (M + Na) calculated for C<sub>49</sub>H<sub>63</sub>N<sub>4</sub>O<sub>9</sub>NaSiP, 933.3994; found: 933.4014.

## References

(1) Hernández, A. R. and Kool, E. T. (2011) The components of xRNA: Synthesis and fluorescence of a full genetic set of size-expanded ribonucleosides, *Org. Lett.* *13*, 676-679.

# NMR Spectra

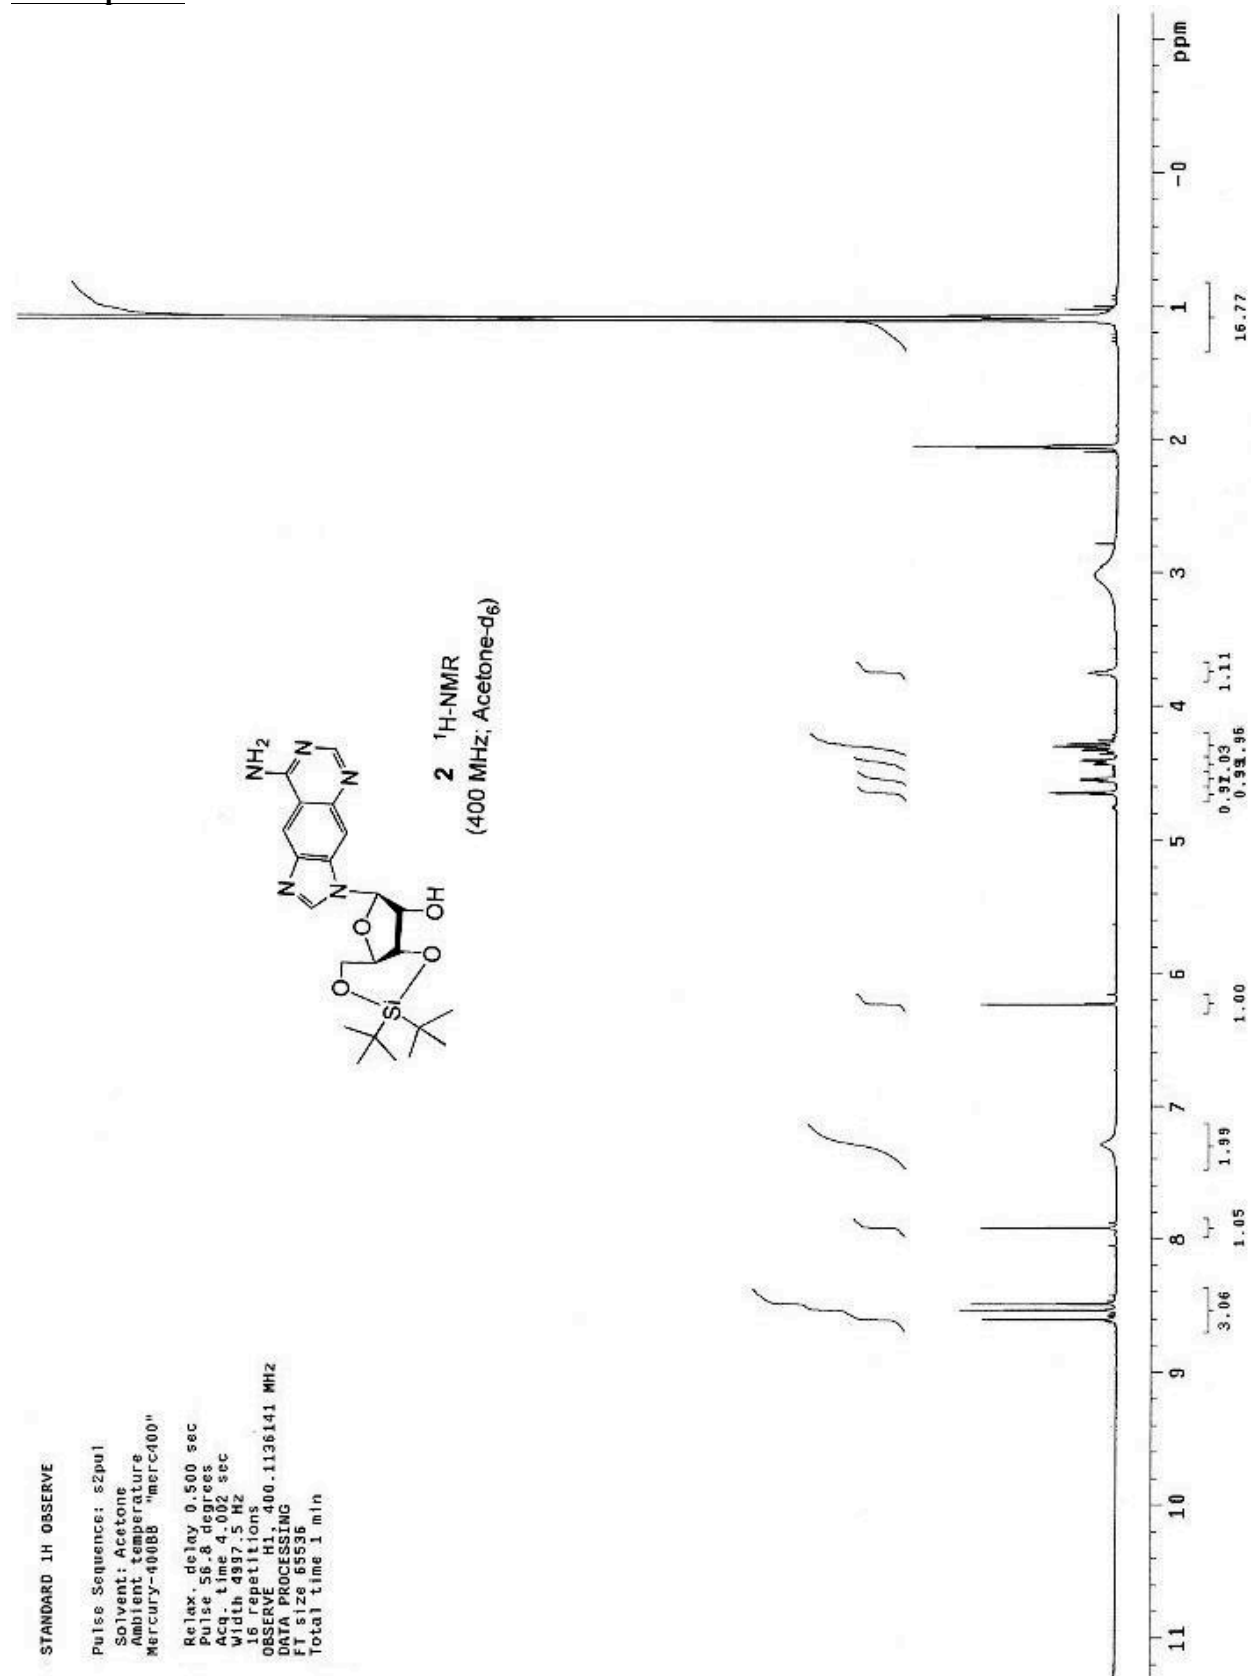

13C OBSERVE

Pulse Sequence: s2pu1  
Solvent: Acetone  
Ambient temperature  
Mercury-40088 "merc400"

Relax. delay 0.500 sec  
Pulse 39.6 degrees  
Acq. time 1.189 sec  
Width 25000.0 Hz  
416 repetitions  
OBSERVE C13, 100.6086243 MHz  
DECOUPLE H1, 400.1156326 MHz  
Power 45 dB  
continuously on  
WALTZ-16 modulated  
DATA PROCESSING  
Line broadening 0.5 Hz  
FT size 65536  
Total time 1 hr, 7 min, 7 sec

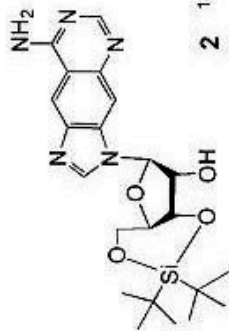

2 <sup>13</sup>C-NMR  
(100 MHz; Acetone-d<sub>6</sub>)

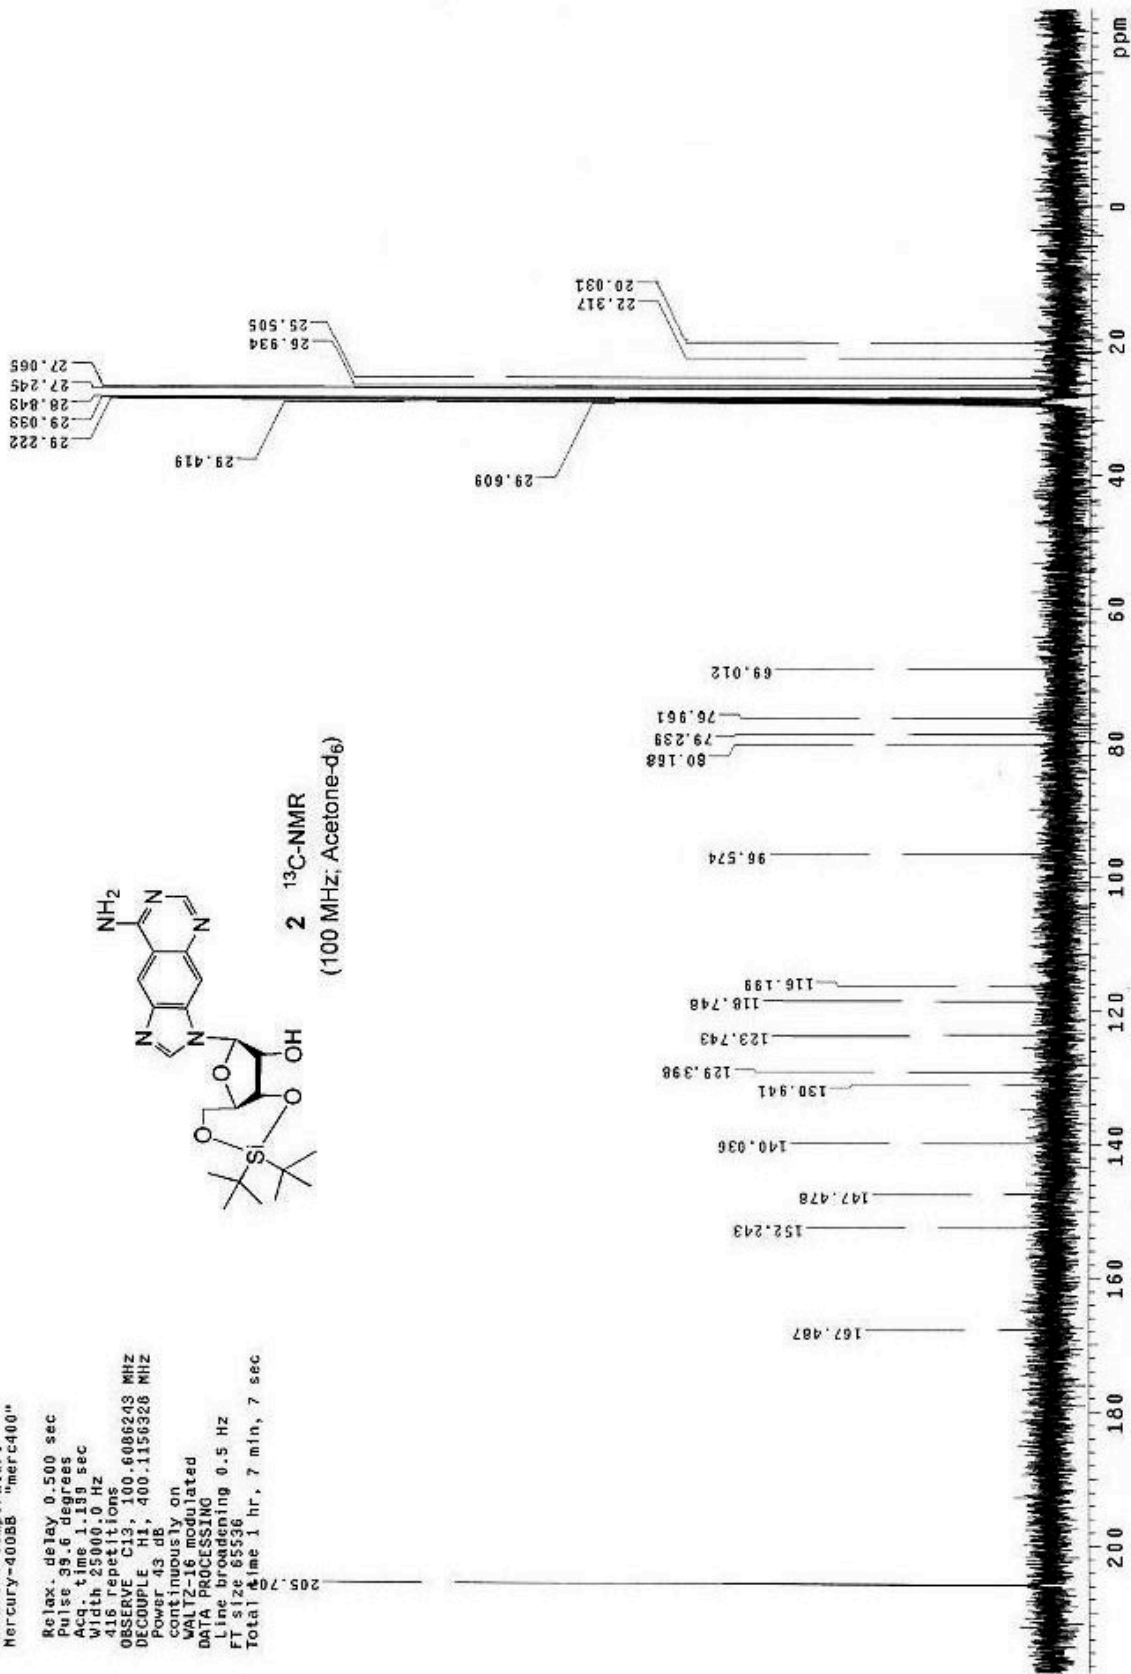

STANDARD 1H OBSERVE

Pulse Sequence: gCOSY

Solvent: Acetone  
Robot: temperature  
Mercury-400BB "merc400"

Relax. delay 1.000 sec  
Acq. time 0.127 sec  
Width 4032.3 Hz  
2D Width 4032.3 Hz  
Single scan

128 increments  
OBSERVE F2 400.1136141 MHz

DATA PROCESSING 0.063 sec  
F1 DATA PROCESSING  
Scanning 0.016 sec  
FT size 1024 x 1024  
Total time 3 min, 32 sec

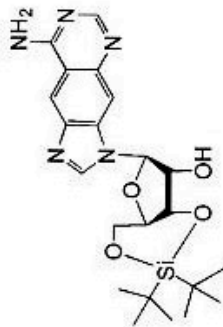

2 gCOSY  
(400 MHz; acetone-d<sub>6</sub>)

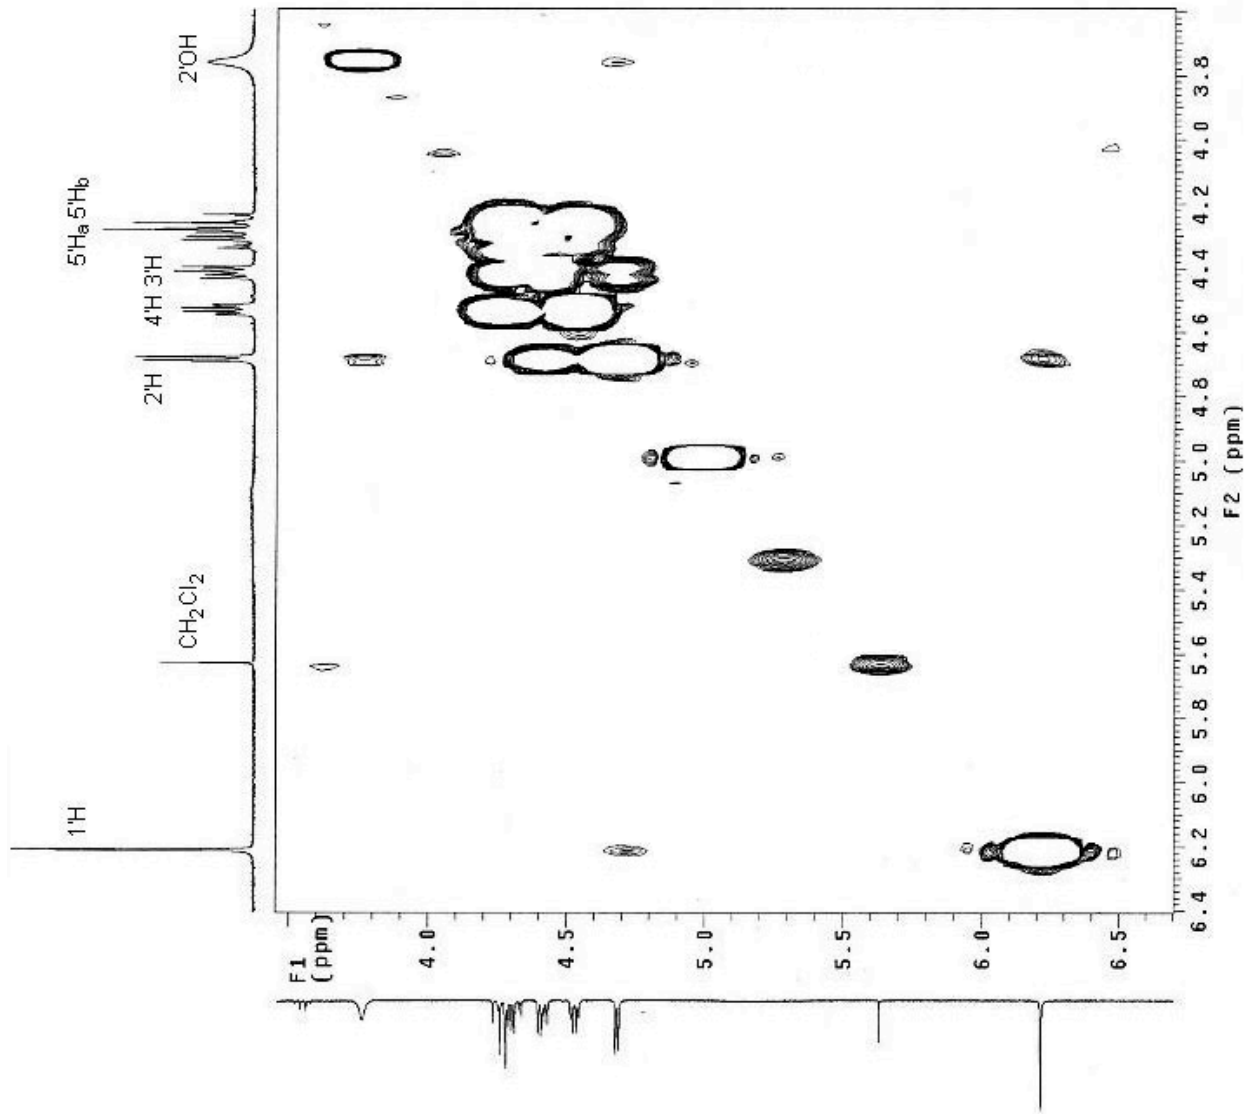

STANDARD 1H OBSERVE

Pulse Sequence: s2pu1  
Solvent: Acetone  
Ambient temperature  
Mercury-400BB "merc400"

Relax. delay 0.500 sec  
Pulse 56.8 degrees  
Acq. time 4.002 sec  
Width 4897.5 Hz  
16 repetitions  
OBSERVE H1, 400.1136141 MHz  
DATA PROCESSING  
FT size 45536  
Total time 1 min, 22 sec

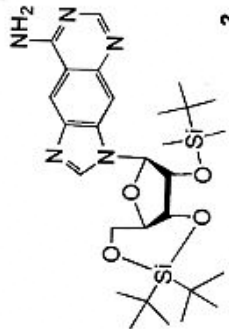

**3** <sup>1</sup>H-NMR  
(400 MHz; Acetone-d<sub>6</sub>)

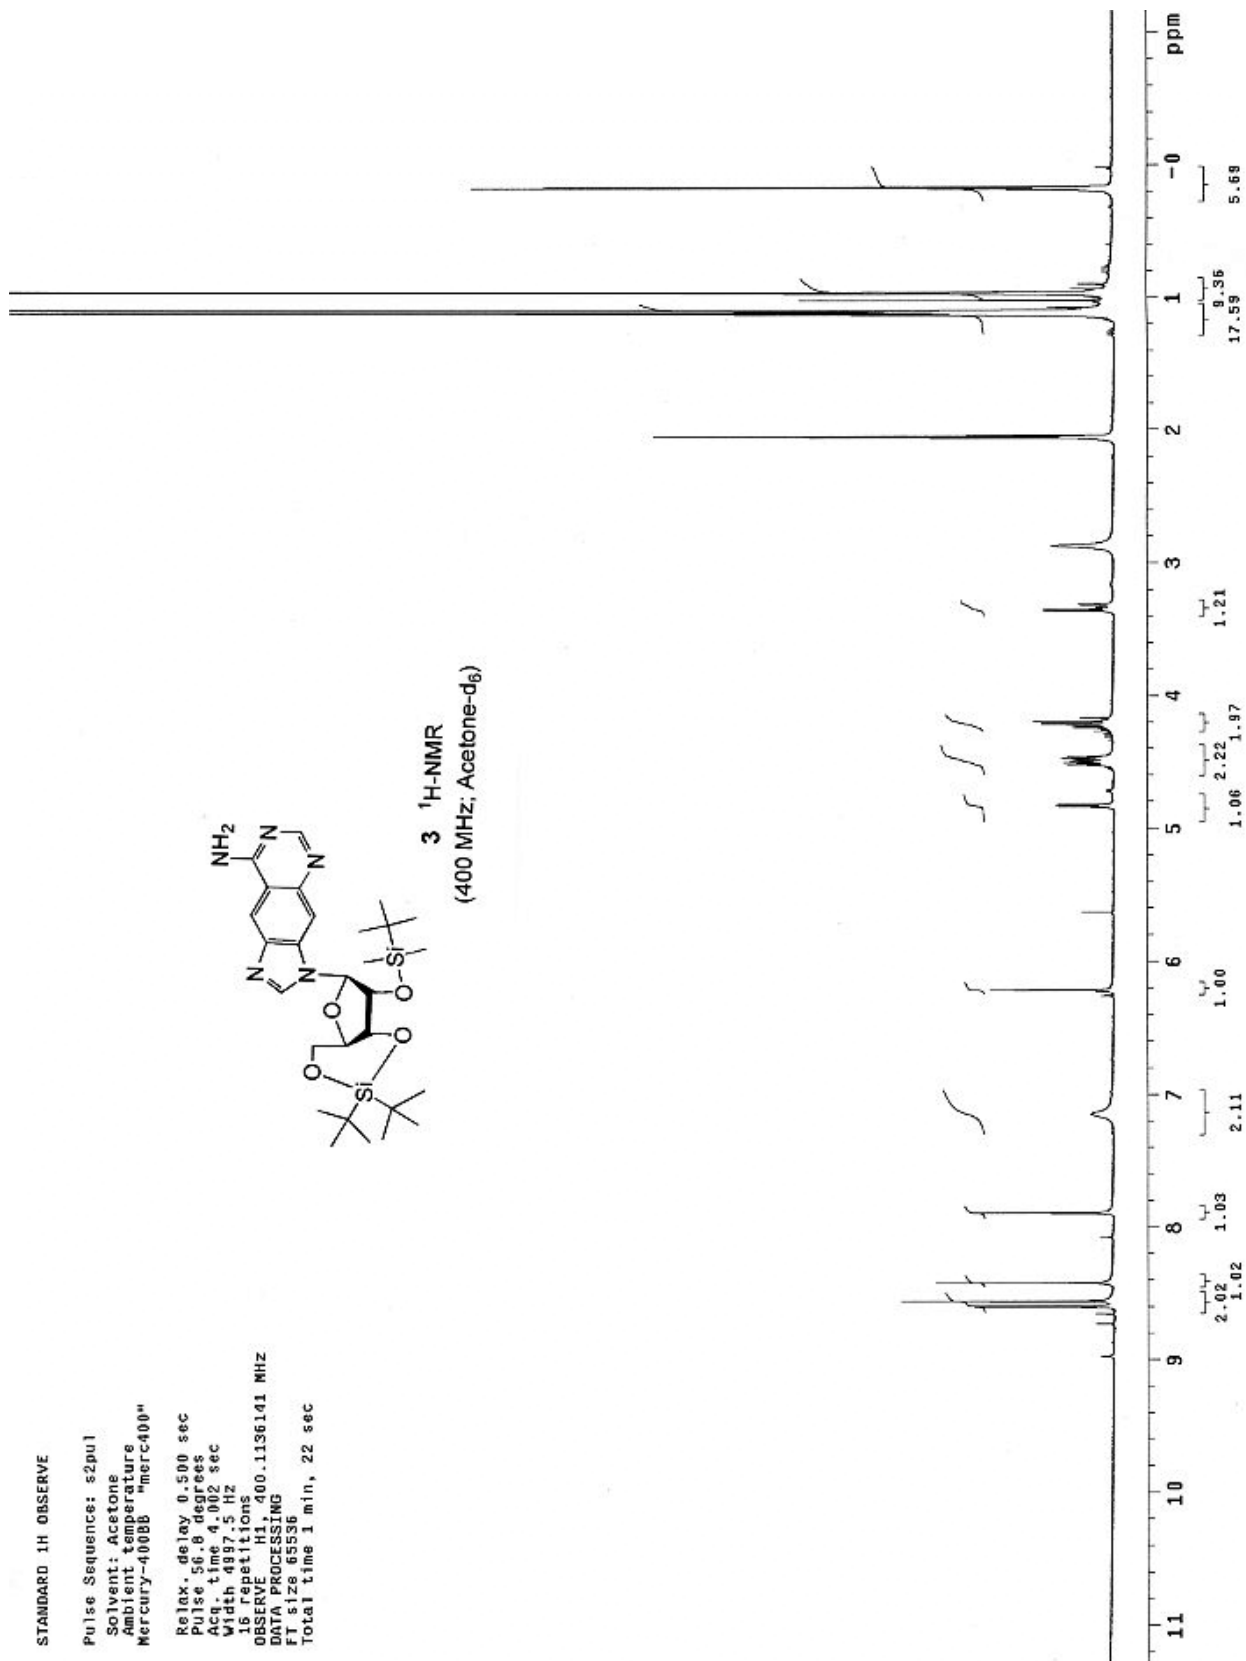

13C OBSERVE

Archive directory:  
/export/home/armandoh/vnmr/sys/data  
Sample directory:

File: AH7-37rf43-13C

Pulse Sequence: s2pu1  
Solvent: Acetone

Relax. delay 0.500 sec  
Pulse: 98.1 degrees  
Acq. time: 1.195 sec  
Width: 25000.0 Hz  
96 repetitions

OBSERVE: C13, 100.6096243 MHz  
DECOUPLE: H1, 400.1156328 MHz  
Power: 33 dB, 400.1156328 MHz  
continuously on  
WALTZ-H6 modulated  
DATA PROCESSING  
Line broadening 0.5 Hz  
FI size: 65536  
Total time: 29 min

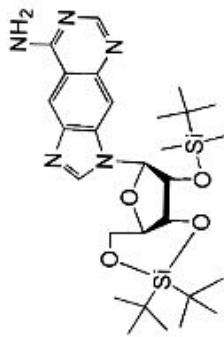

**3** <sup>13</sup>C-NMR  
(100 MHz; Acetone-d<sub>6</sub>)

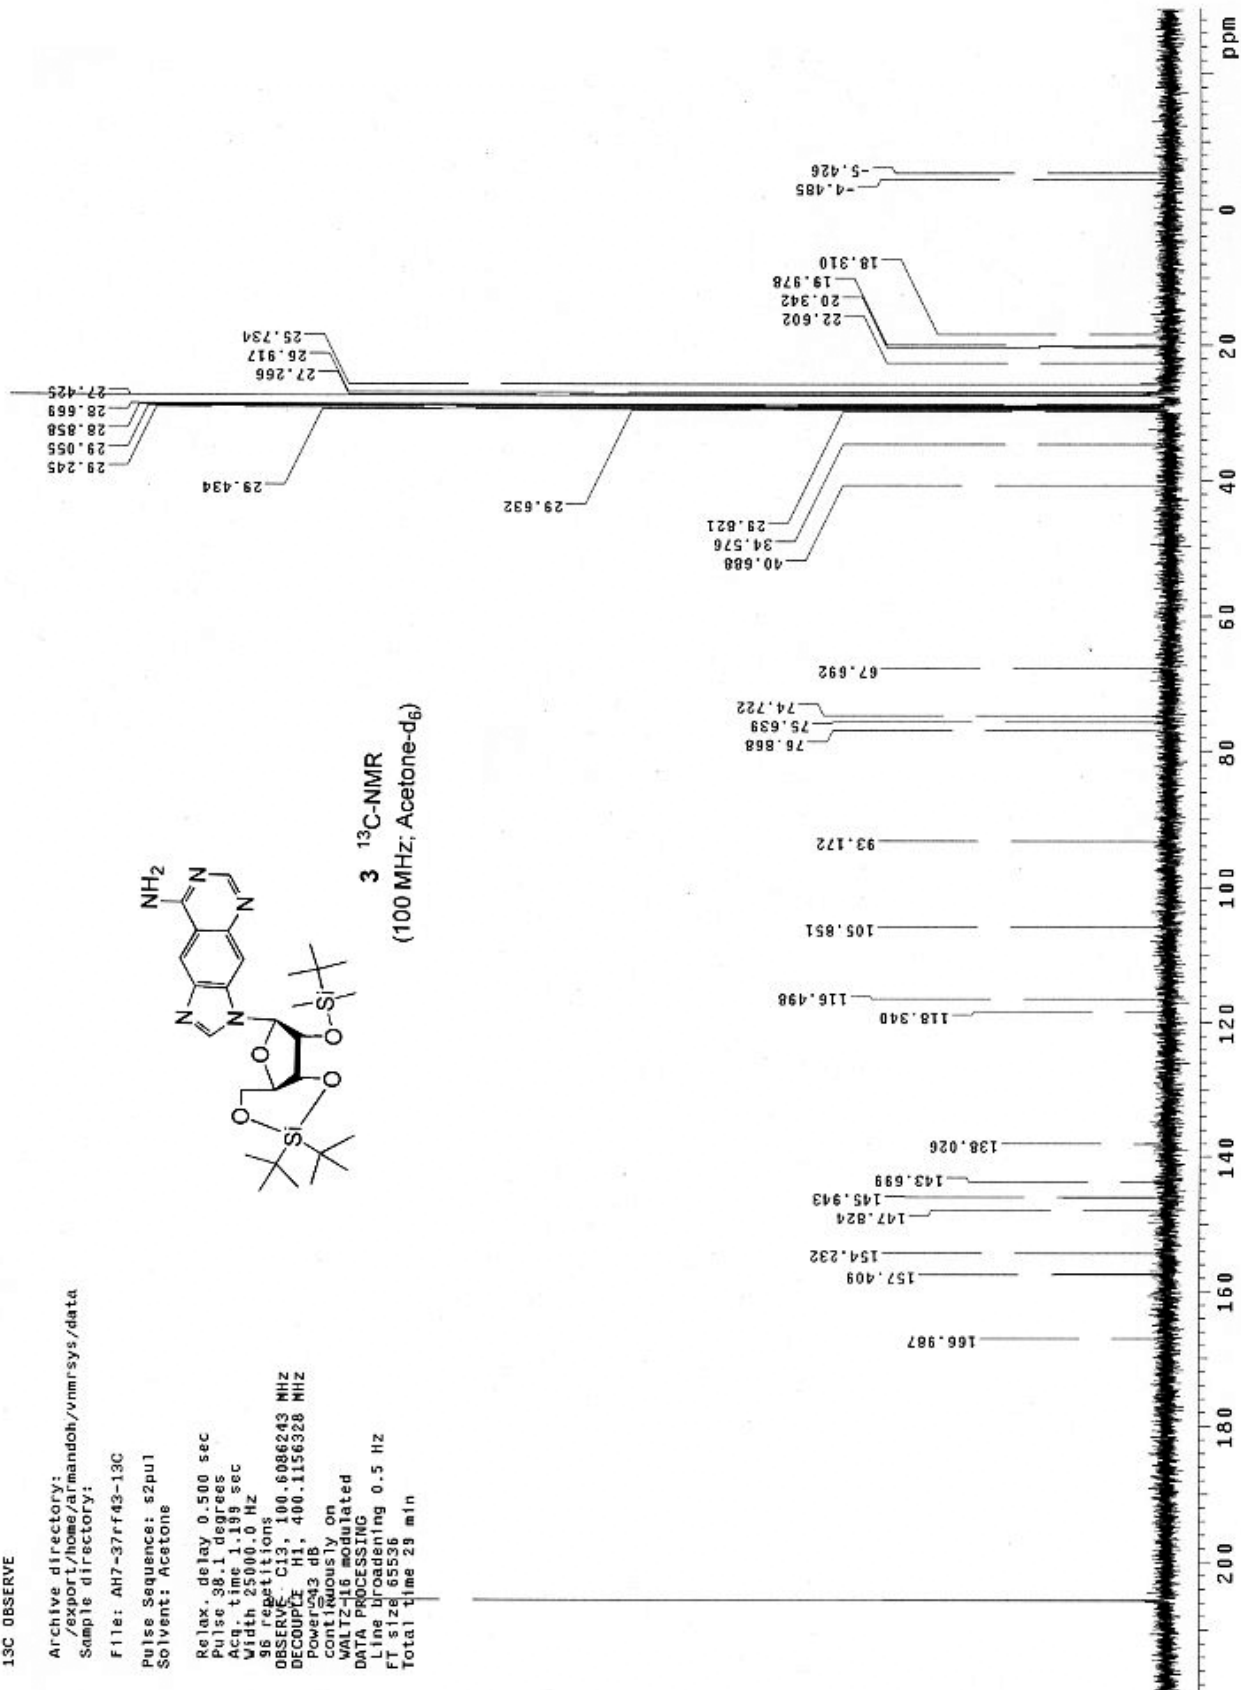



STANDARD 1H OBSERVE

Pulse Sequence: s2pu1  
Solvent: CDCl3  
Ambient temperature  
Mercury-400BB "merc400"

Relax. delay 0.500 sec  
Pulse 36.0 degrees  
Acq. time 1.012 sec  
F1 497.15012  
16.94 et 11.012  
OBSERVE H1 400.1115375 MHZ  
DATA PROCESSING  
F1 size 65536  
Total time 1 min, 22 sec

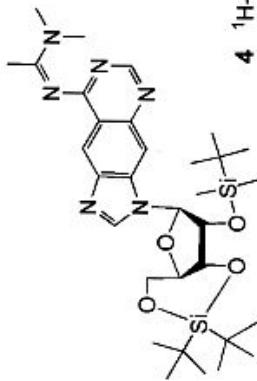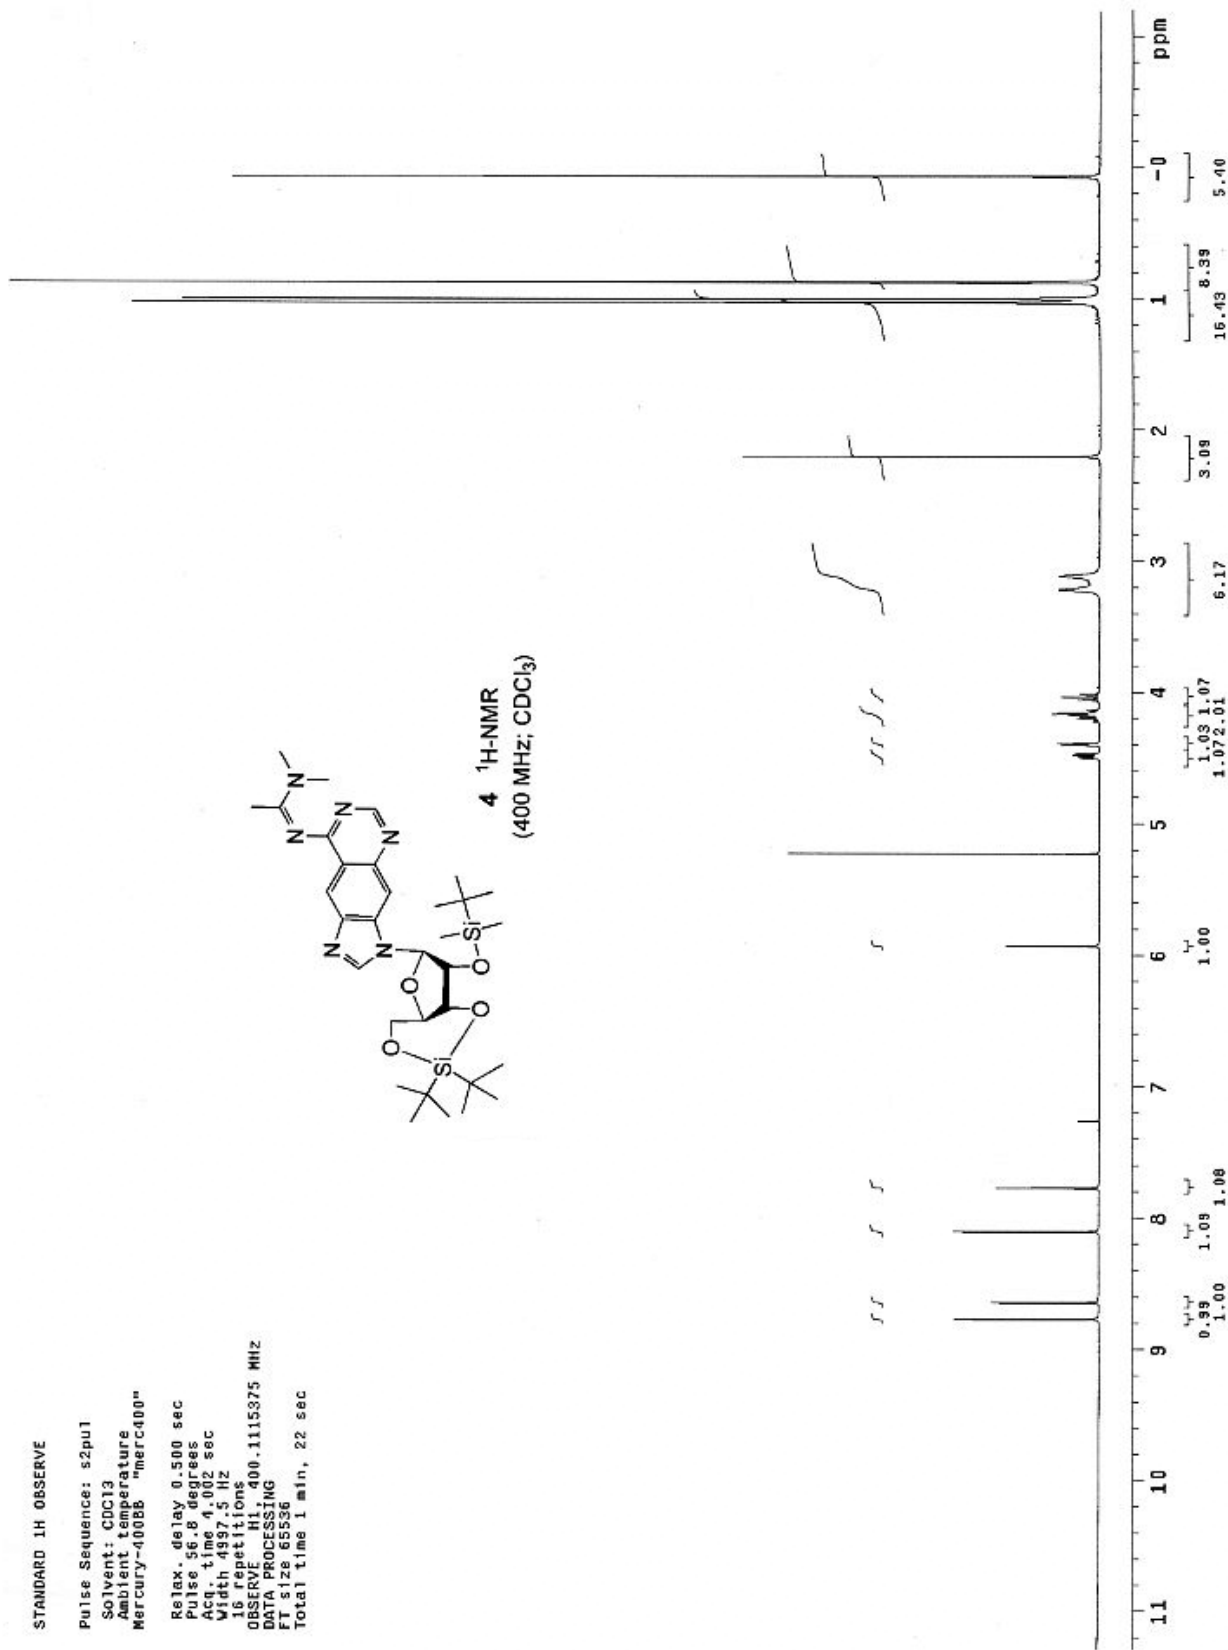

13C OBSERVE

Archive directory:  
/export/home/drmandoh/vmarsys/data  
Sample directory:

File: AH7-42rf55-13C

Pulse Sequence: s2pul

Solvent: CDCl3

Relax. delay 0.500 sec

Pulse 38.1 degrees

Width 25000.0 Hz

Waltz 176 repetitions

Waltz 176 repetitions

OBSERVE C13, 100.6081352 MHz

DECOUPLE H1, 400.1135562 MHz

Power 43 dB, 400.1135562 MHz

continuously on

WALTZ-16 modulated

DATA PROCESSING

Line broadening 0.5 Hz

FT size 65536

Total time 29 min

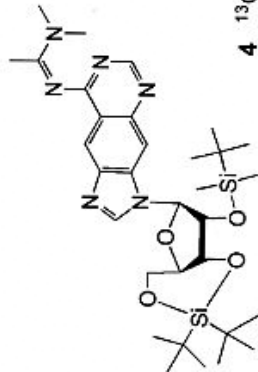

4 <sup>13</sup>C-NMR  
(100 MHz; CDCl<sub>3</sub>)

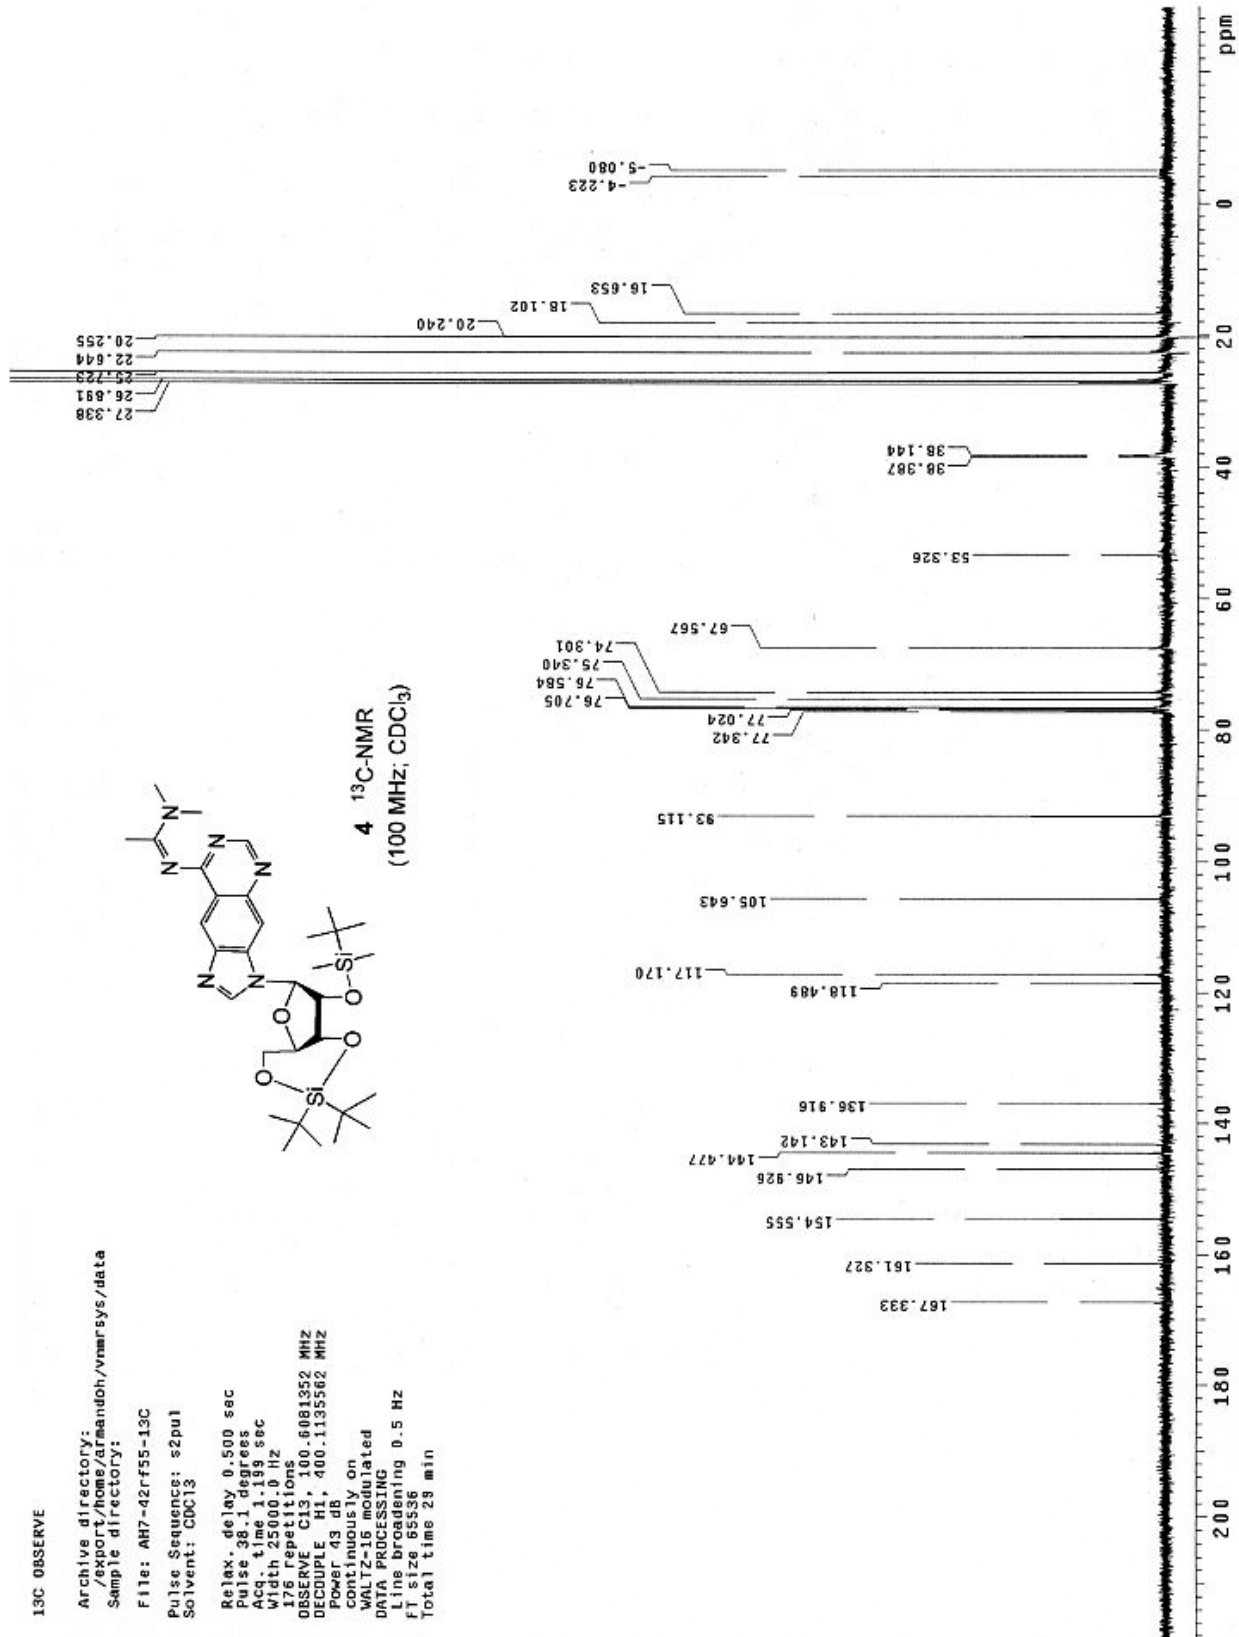

STANDARD 1H OBSERVE

Pulse Sequence: s2pul  
Solvent: CDCl3  
Ambient temperature  
Mercury-40085 "msrc400"  
Relax. delay 0.500 sec  
Pulse 56.8 degrees  
Acq. time 4.002 sec  
Width 4997.5 Hz  
16 repetitions  
OBSERVE F1, 400.115375 MHz  
DATA PROCESSING  
F1 size 65536  
Total time 1 min, 22 sec

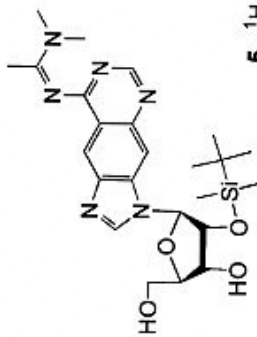

5 <sup>1</sup>H-NMR  
(400 MHz; CDCl<sub>3</sub>)

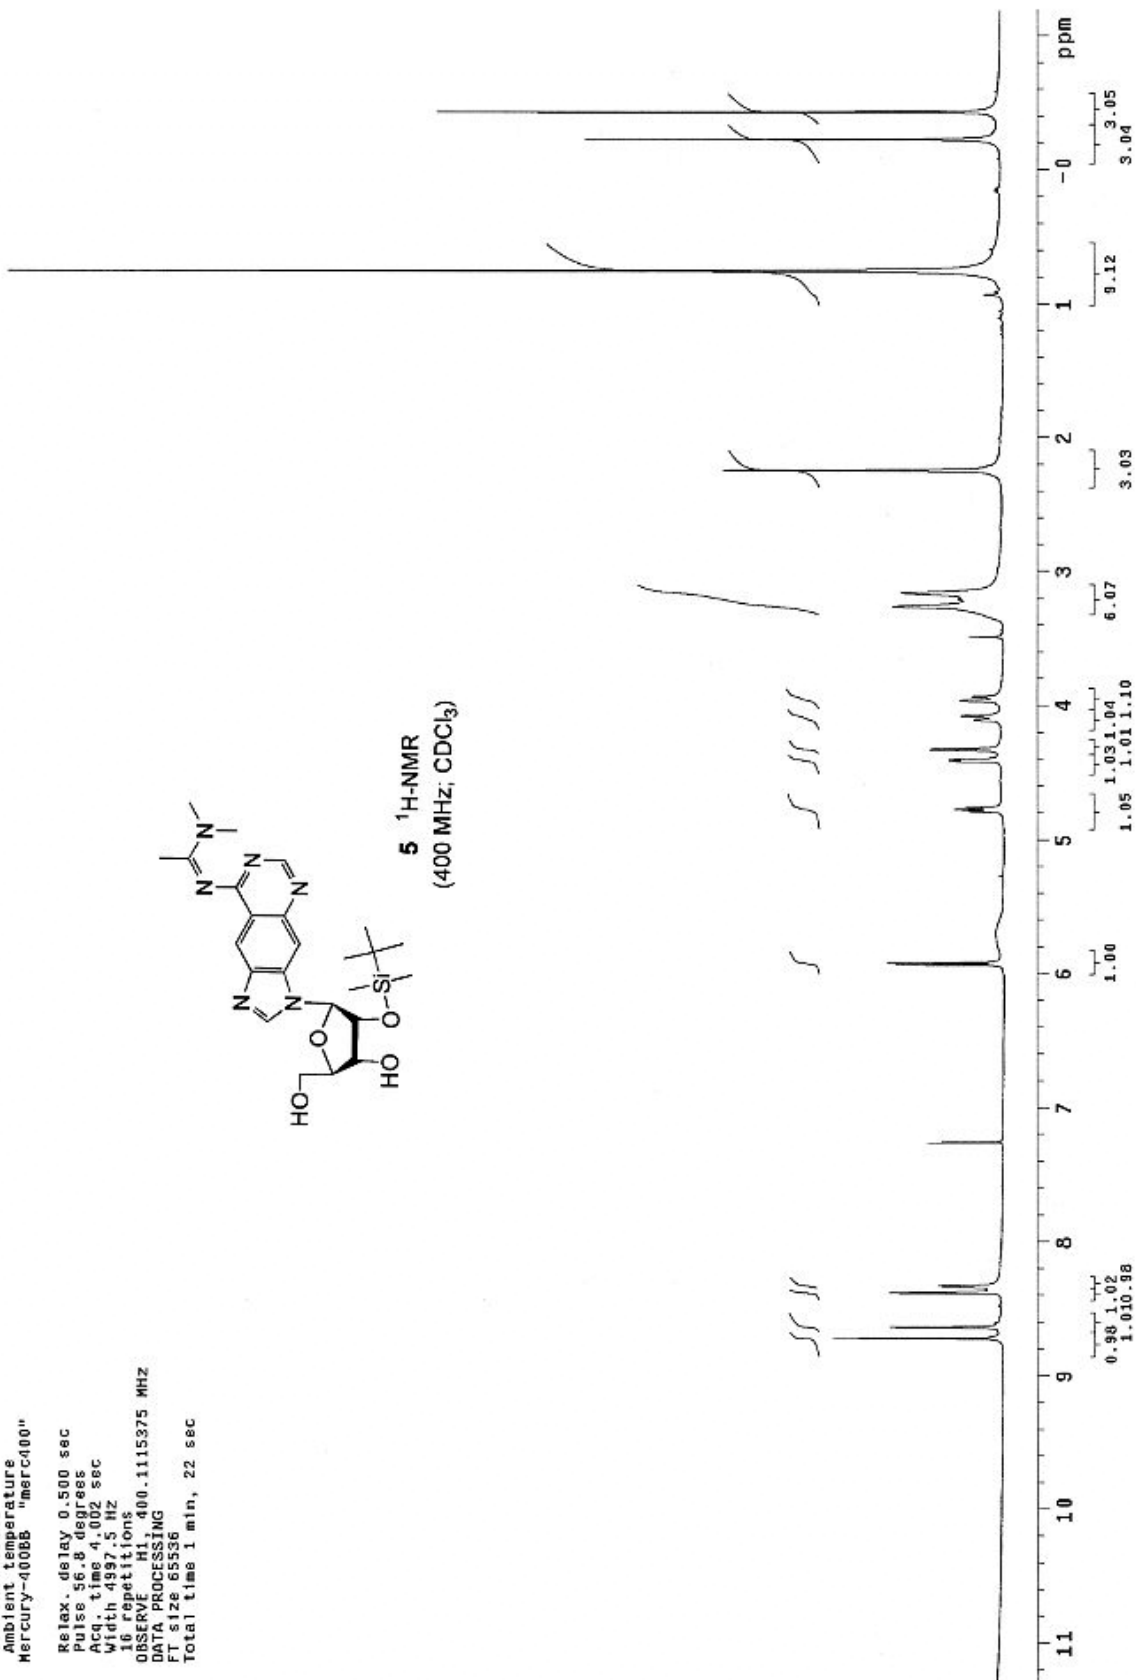

13C OBSERVE

exp6 std13c

```
SAMPLE DEC. & VT  
date Feb 27 2010 dfrq 400.114  
solvent CDC13 dn H1  
file exp dpwr 43  
ACQUISITION exp dof 0  
sfrq 100.618 dm yyy  
tn C13 dmm w  
at 1.199 dmf 8900  
np 59568  
sw 25000.0 lb PROCESSING 0.50  
fb 13600 wfile  
ds 16 proc ft  
tpwr 53 fn not used  
pw 0.500 werr  
tl 1024 wxp  
nt 512 wnt  
ct  
a1ock n  
gain not used  
FLAGS n  
ll n  
in n  
in n  
dp DISPLAY y  
sp -2971.7  
wp 24599.2  
vs 200  
sc 0  
wc 250  
hzmm 100.00  
ls 500.00  
rf1 10719.3  
rfp 7740.6  
t1n  
t1s 100.000  
nm no ph
```

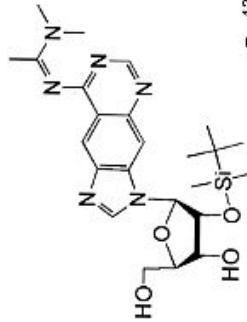

**5** <sup>13</sup>C-NMR  
(100 MHz; CDCl<sub>3</sub>)

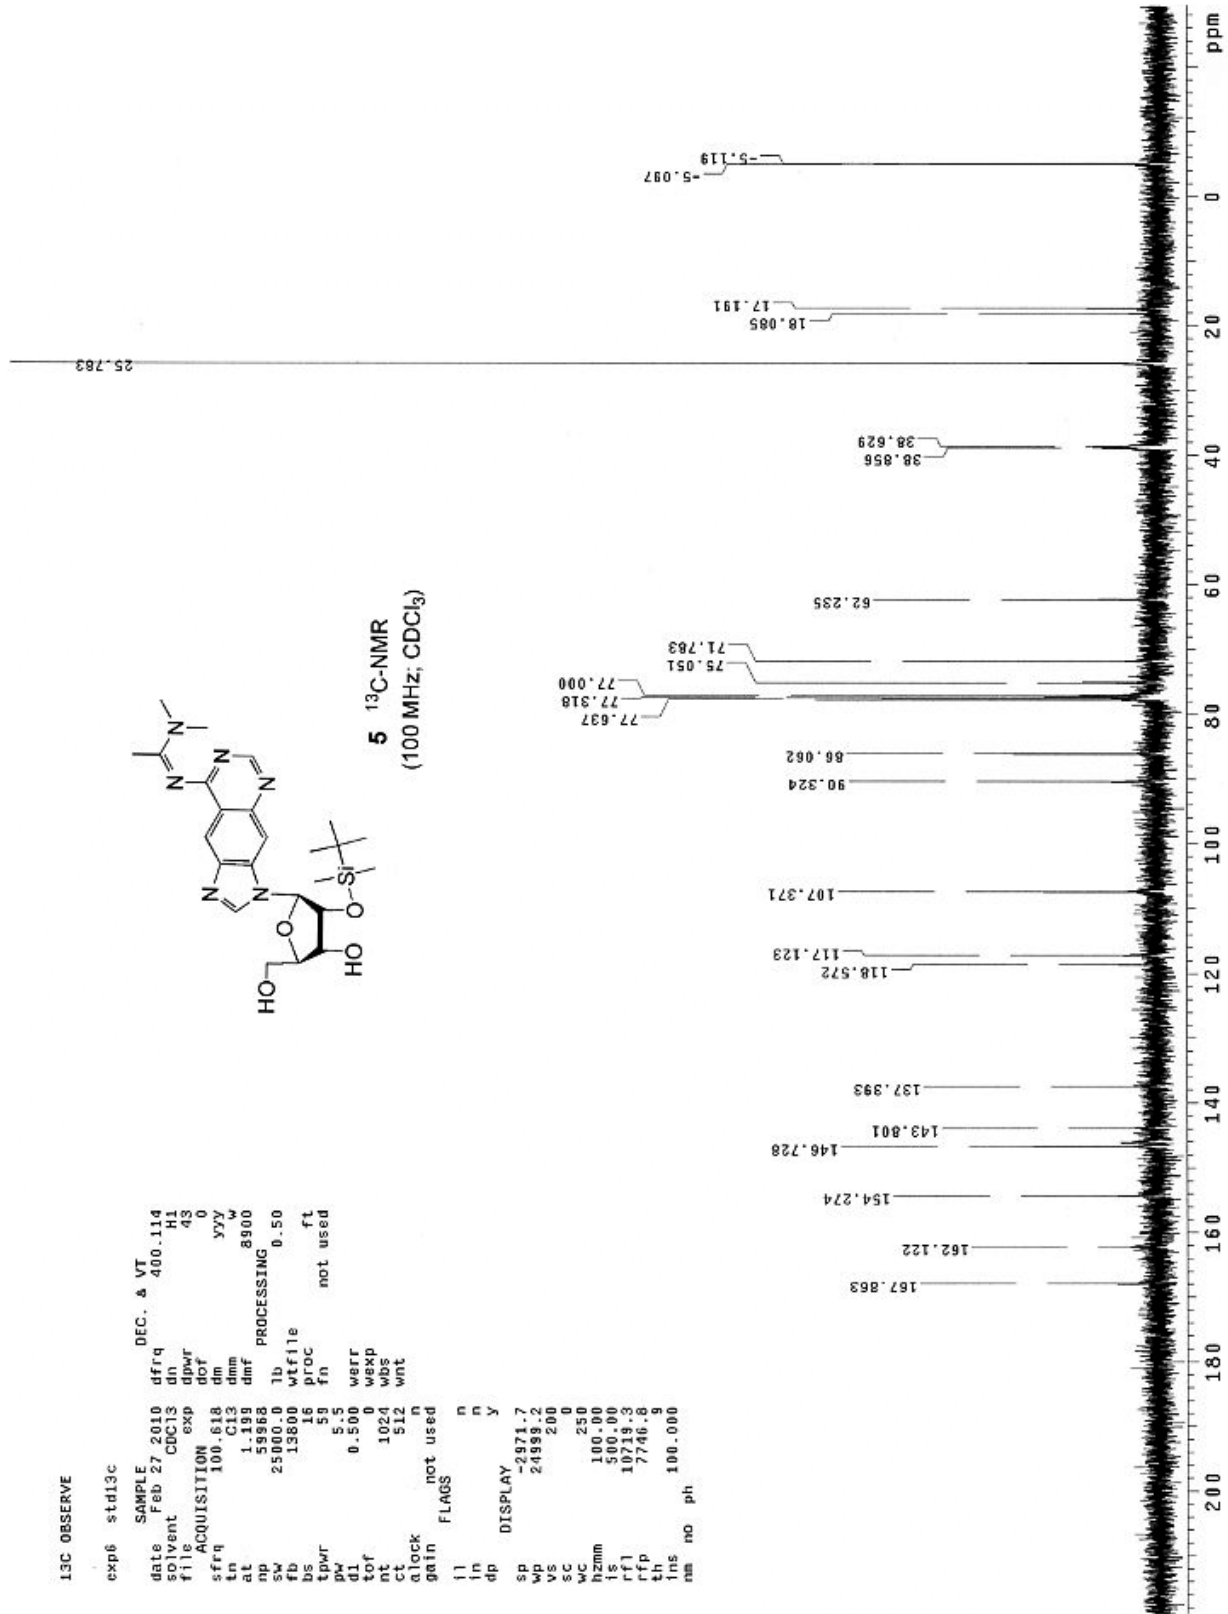

STANDARD 1H OBSERVE

```

exp6 std1h
SAMPLE
date 1 2010
solvent Mar CDC13
file CDC13
ACQUISITION exp
sfrq 400.114
at 4.002
np 40000
sw 4997.5
fb not used
bs 4
tpwr 61
pw 7.0
d1 0.500
tof 0
nt 16
ct 16
alock n
gain not used
flags
11 n
in n
dp y
DISPLAY
sp -479.8
wp 4997.3
vs 200
sc 0
wc 250
hzmm 13.33
ls 500.00
rfi 480.0
t1p 20
t1s 20
t1s 1.000
nm cdc ph
  
```

```

DEC. & VT
dfrq 400.114
dn H1
dpwr 30
dof 0
dm nnn
dmf c
dmf 200
wtfile
proc fl
fn not used
  
```

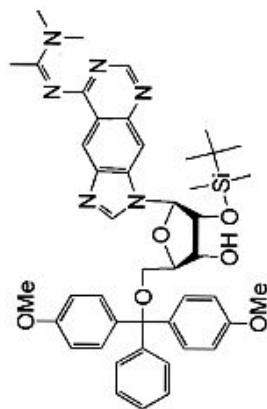

6 <sup>1</sup>H-NMR  
(400 MHz; CDCl<sub>3</sub>)

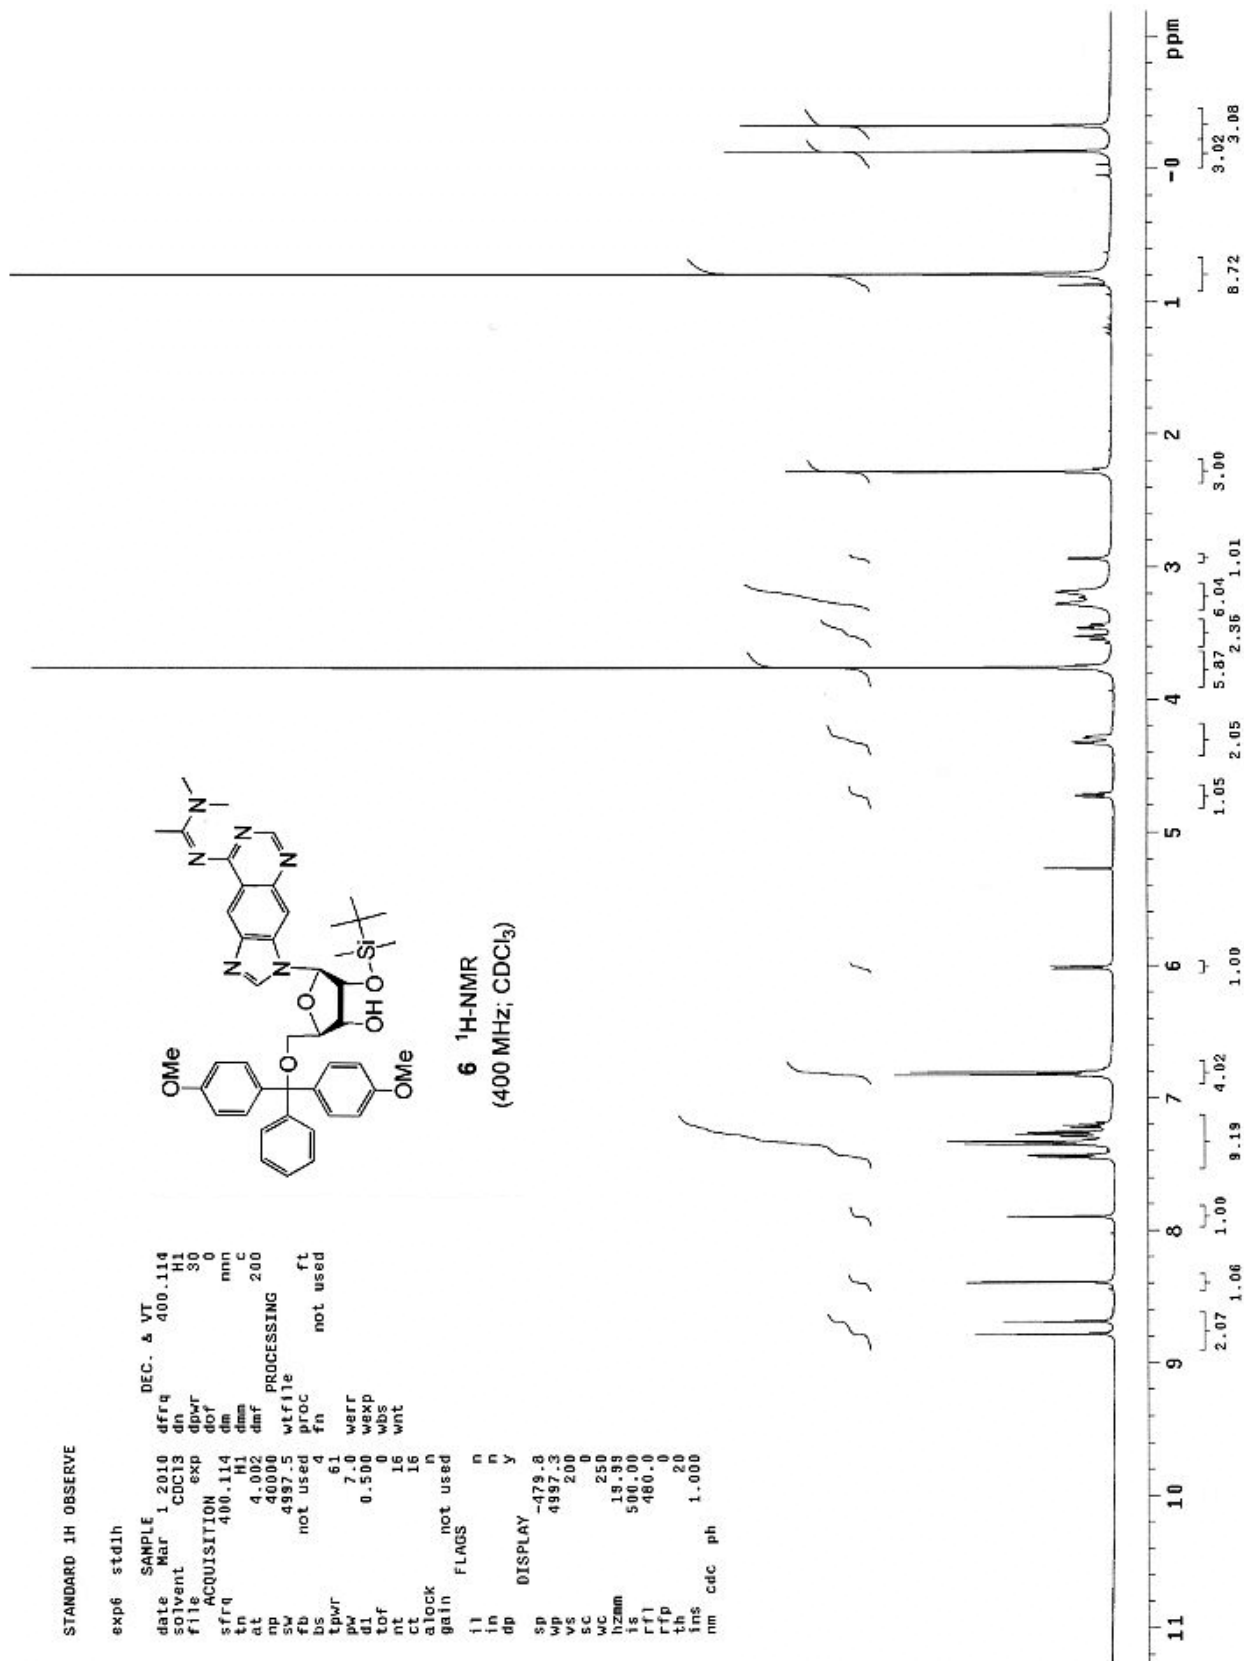

13C OBSERVE

Archive directory:  
/export/home/armandoh/vnmrsys/data  
Sample directory:

File: AH7-46-rf19-13C  
Pulse Sequence: s2pu1  
Solvent: CDCl3

Relax. delay 0.500 sec  
Pulse 38.1 degrees  
Acq time 1.199 sec  
Width 25000.0 Hz  
352 repetitions  
OBSERVE C13, 100.6081357 MHZ  
DECOUPLE H1, 400.1135562 MHZ  
Power 43 dB,  
continuously on  
WALTZ-16 modulated  
DATA PROCESSING  
Line broadening 0.5 Hz  
FT size 65536  
Total time 29 min

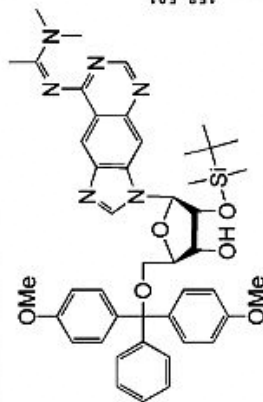

6 <sup>13</sup>C-NMR  
(100 MHz; CDCl<sub>3</sub>)

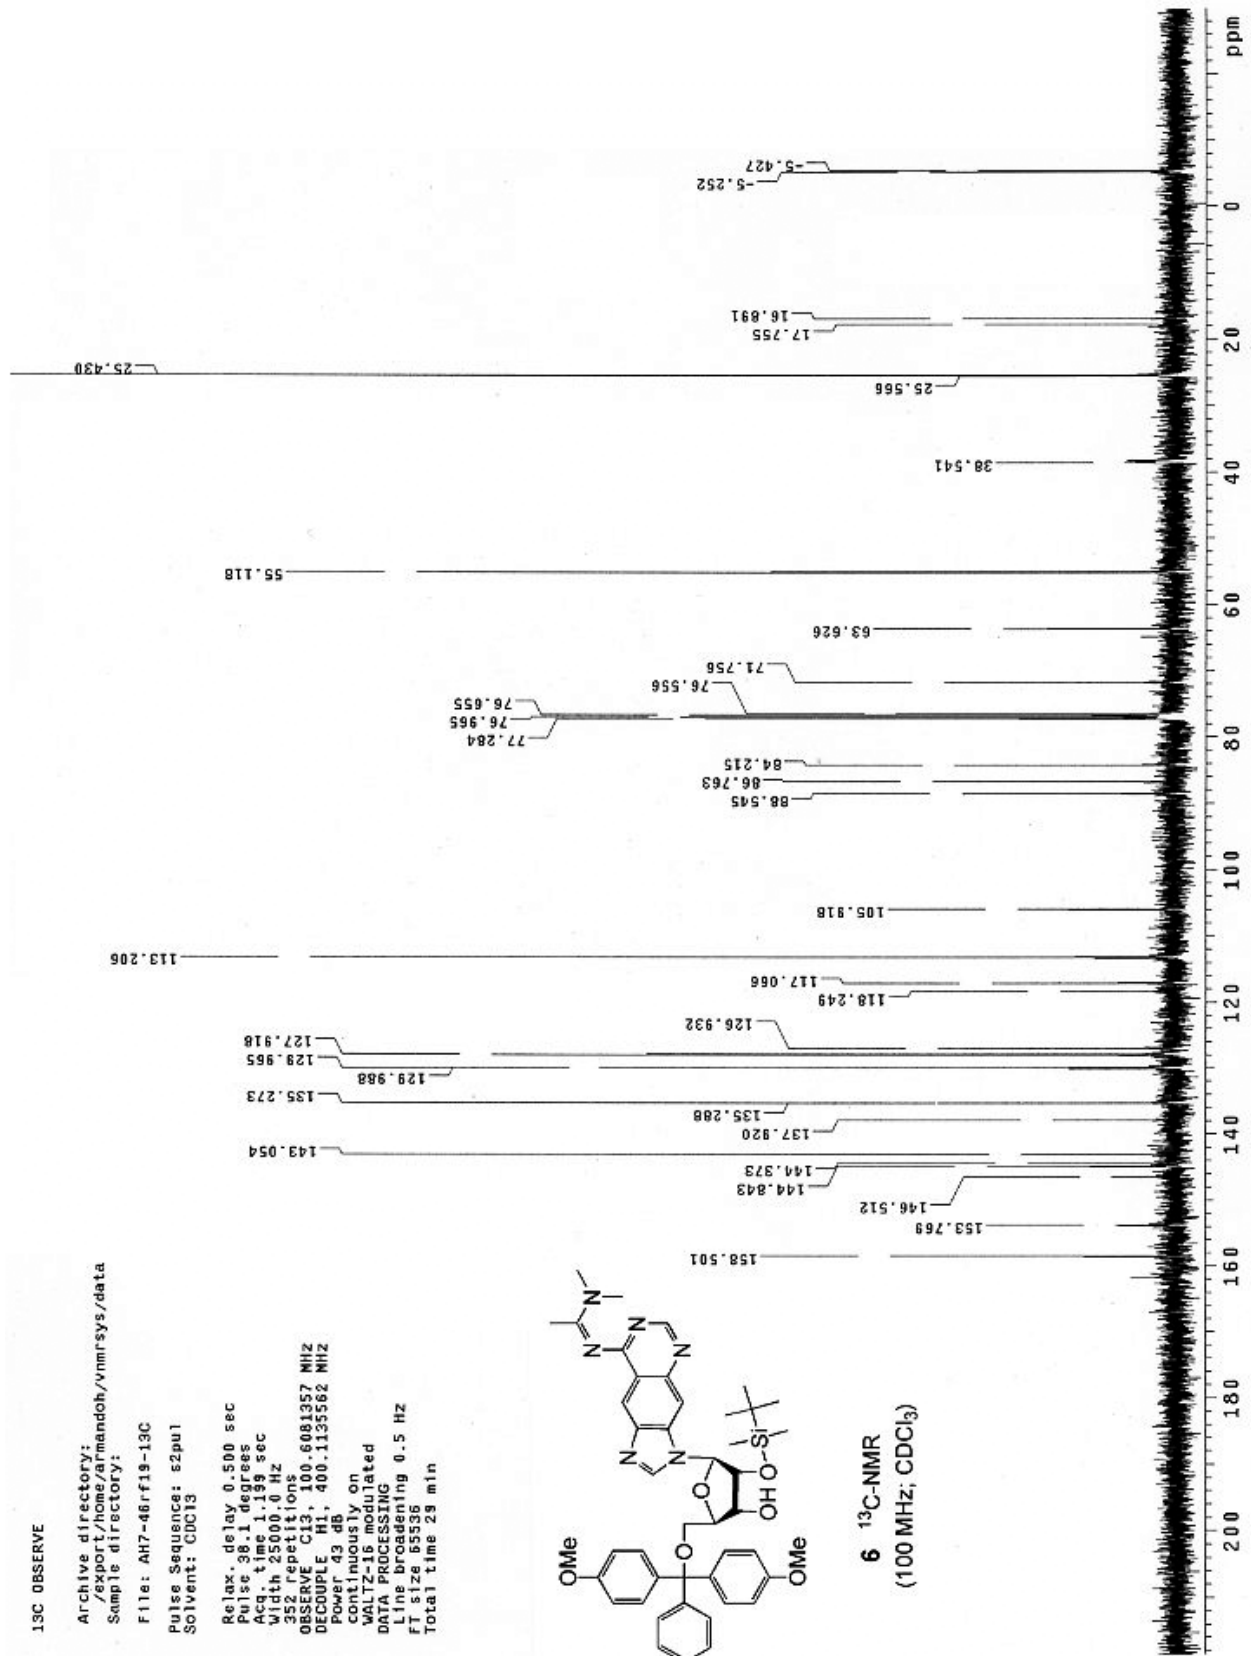

STANDARD 1H OBSERVE

Pulse Sequence: gCOSY  
 Solvent: CDCl3  
 Ambient temperature  
 Mercury-400BB "merc400"

Relax. delay 1.000 sec  
 Acq. time 0.250 sec  
 Width 4088.4 Hz  
 2D Width 4088.4 Hz  
 Single scan  
 128 increments  
 OBSERVE H1 400.1115375 MHz  
 DATA PROCESSING  
 Sine bell 0.125 sec  
 F1 DATA PROCESSING  
 Sine bell 0.016 sec  
 FT size 2048 x 2048  
 Total time 3 min, 58 sec

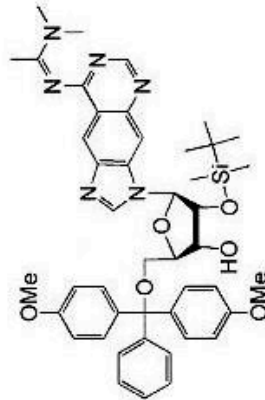

6 gCOSY  
 (400 MHz; CDCl<sub>3</sub>)

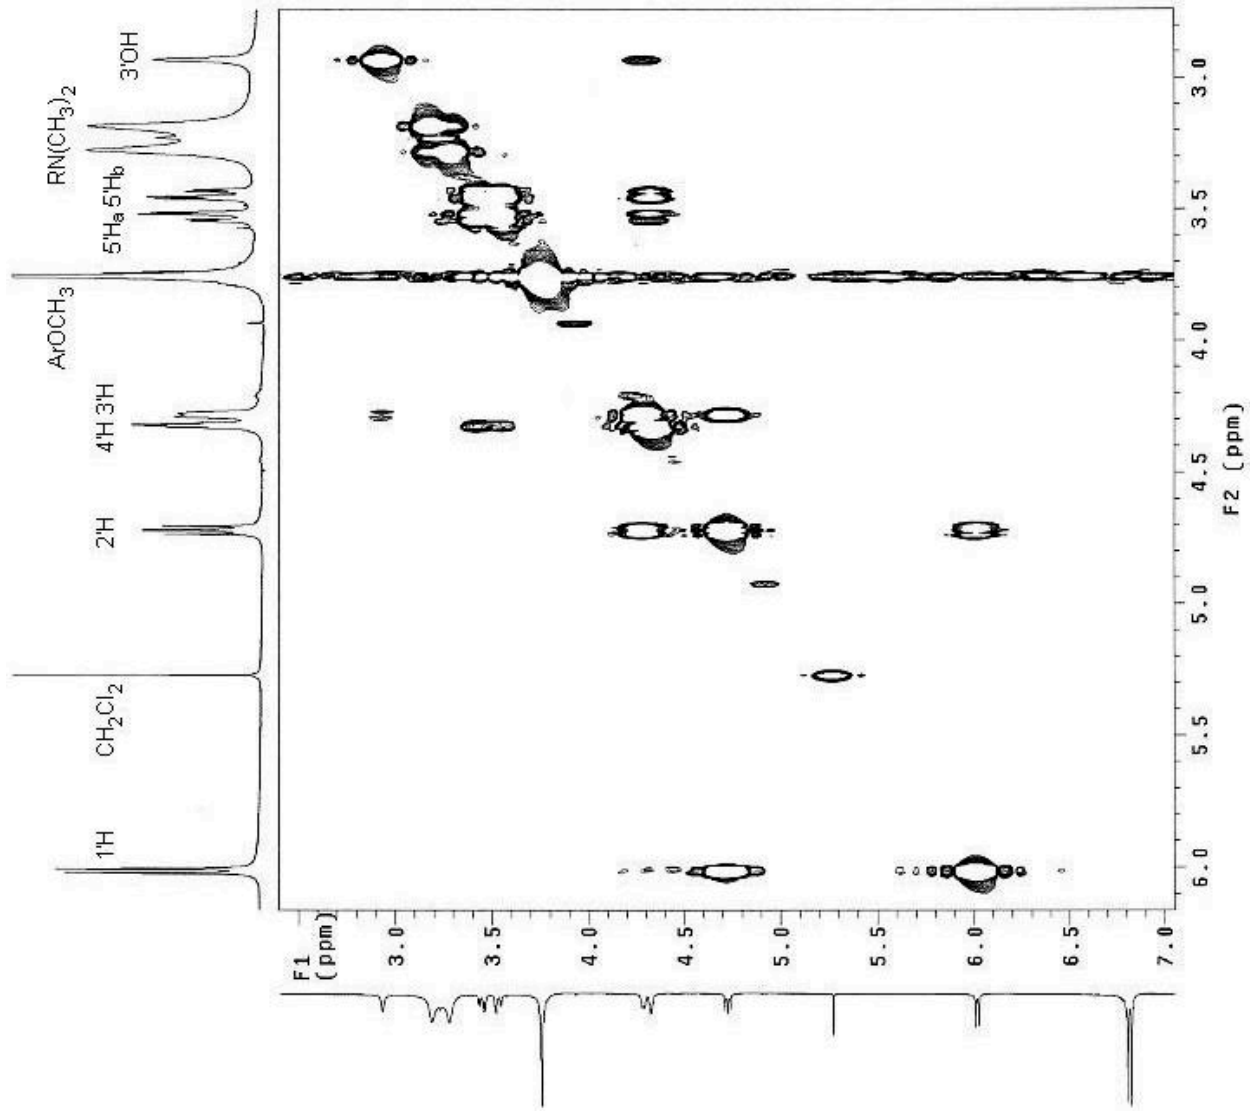

STANDARD 1H OBSERVE

Pulse Sequence: s2pu1  
Solvent: CDCl3  
Ambient Temperature  
Mercury-100BB "merc100"

Relax. delay 0.500 sec  
Pulse 52.1 degrees  
Acq. time 4.002 sec  
Width 4997.5 Hz  
16 repetitions  
OBSERVE HI, 400.1115375 MHz  
DATA PROCESSING  
FT size 65536  
Total time 0 min, 0 sec

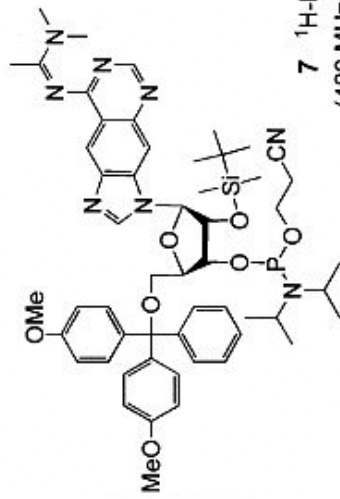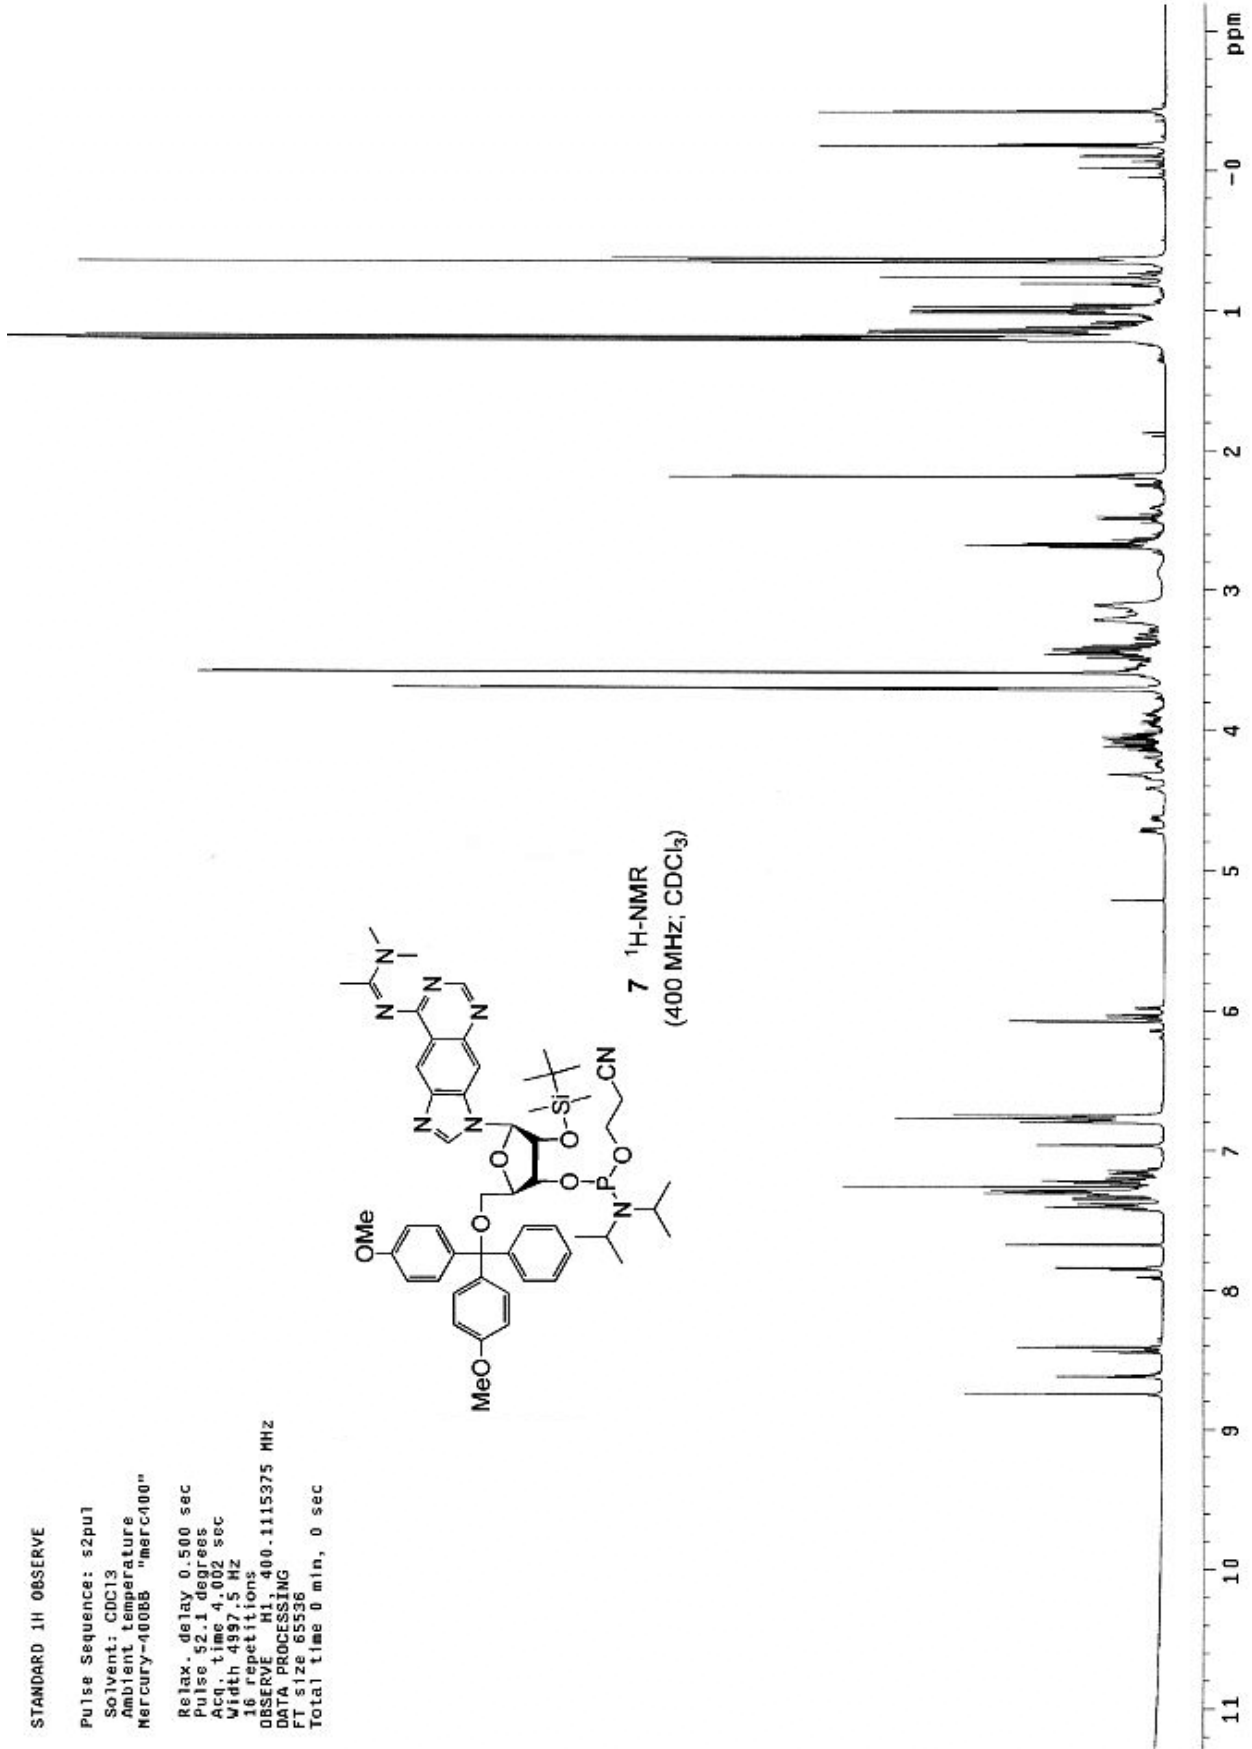



<sup>13</sup>C OBSERVE

Pulse Sequence: szpul  
Solvent: CDCl<sub>3</sub>  
Ambient temperature  
Mercury-400BB "merc400"  
Relax. delay 0.500 sec  
Pulse 36.1 degrees  
Acq. time 1.139 sec  
Width 25000.0 Hz  
QZSW repetitions  
OBSERVE CH1, 100.6081281 MHz  
DECOUPLE CH1, 400.1135562 MHz  
CONTINUOUSLY ON  
WALTZ-16 modulated  
DATA PROCESSING  
Line broadening 0.5 Hz  
FT size 65536  
Total time 33 min, 33 sec

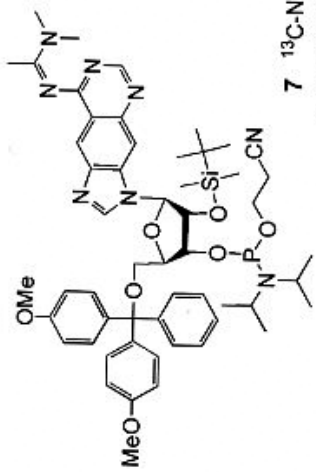

7 <sup>13</sup>C-NMR  
(100 MHz; CDCl<sub>3</sub>)

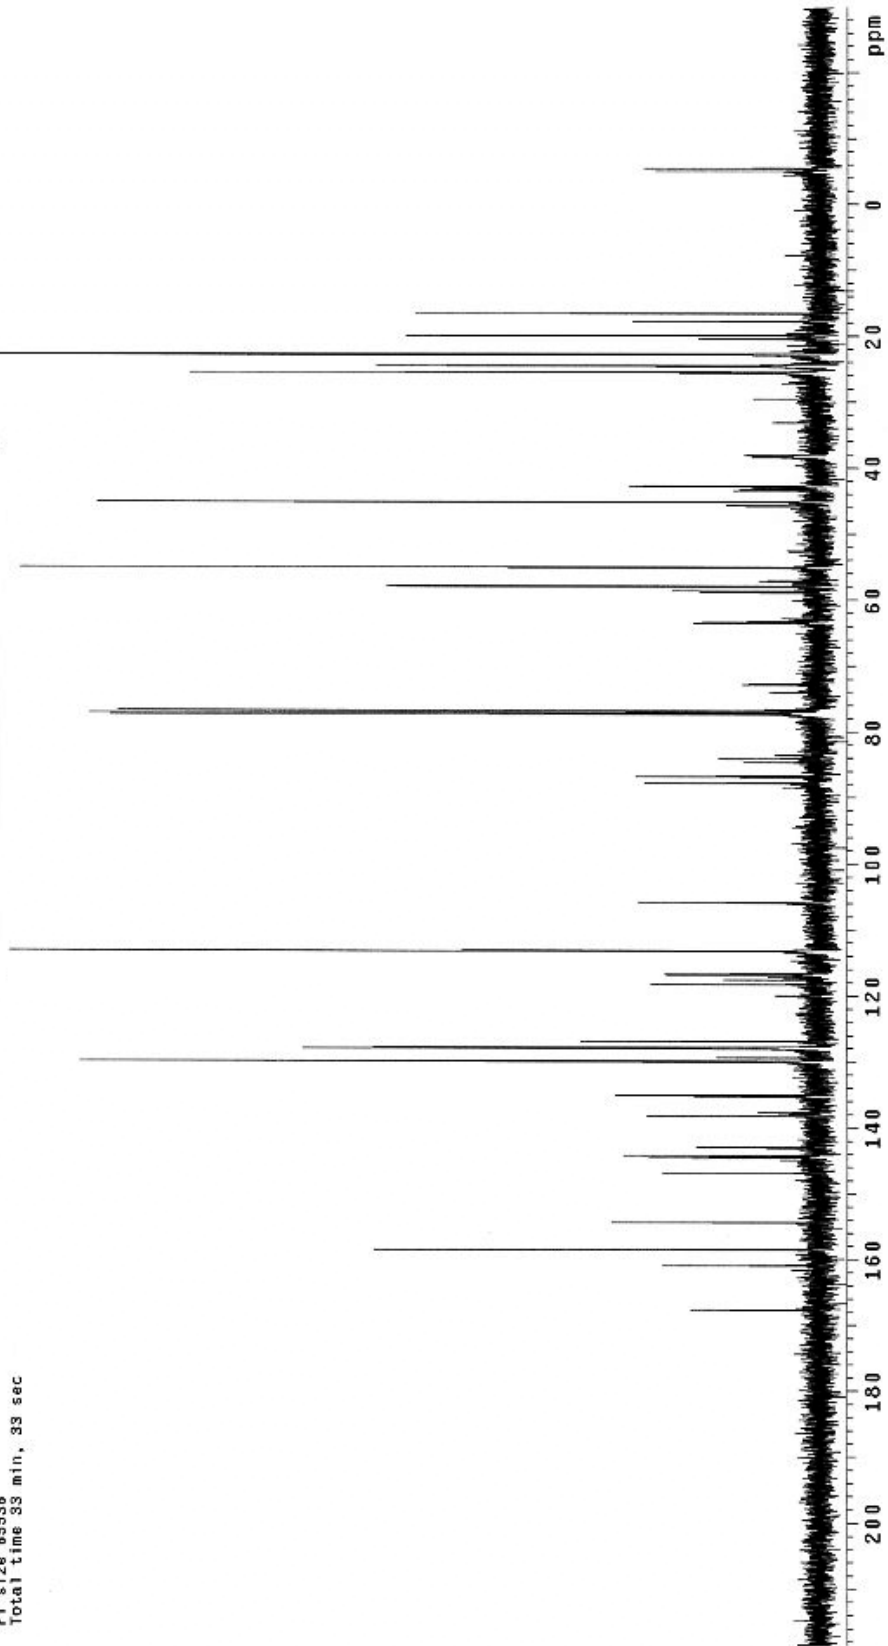

PHOSPHORUS OBSERVE  
STANDARD PARAMETERS  
PHOSPHATE REGION

Pulse Sequence: s2pul  
Solvent: CDCl3  
Ambient temperature  
Mercury-40088 "merc400"  
Relax. delay 2.000 sec  
Pulse 47.4 degrees  
Acq. time 0.800 sec  
Width 50000.0 Hz  
64 repetitions  
OBSERVE P31, 161.9679384 MHz  
DECOUPLE H1, 400.1135562 MHz  
Power 43 dB,  
continuously on  
WALTZ-16 modulated  
DATA PROCESSING  
Line broadening 1.0 Hz  
FT size 131072  
Total time 8 min, 40 sec

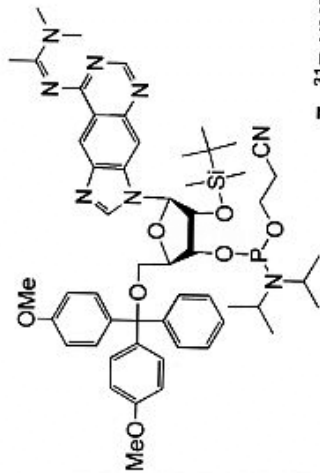

7 <sup>31</sup>P-NMR  
(162 MHz; CDCl<sub>3</sub>)

144.550

152.880

0.43  
1.04

140 120 100 80 60 40 20 0 -20 -40 -60 -80 -100 -120 ppm

STANDARD 1H OBSERVE

Pulse Sequence: s2pu1  
Solvent: DMSO  
Ambient temperature  
Mercury-400BB "merc400"

Relax. delay 0.500 sec  
Pulse 52.1 degree  
Acq time 4.000 sec  
Width 4997.5 Hz  
16 repetitions  
OBSERVE H1 400.1130380 MHz  
DATA PROCESSING  
FT size 65536  
Total time 1 min, 22 sec

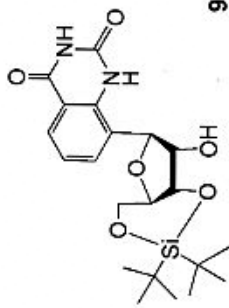

**9** <sup>1</sup>H-NMR  
(400 MHz; DMSO-d<sub>6</sub>)

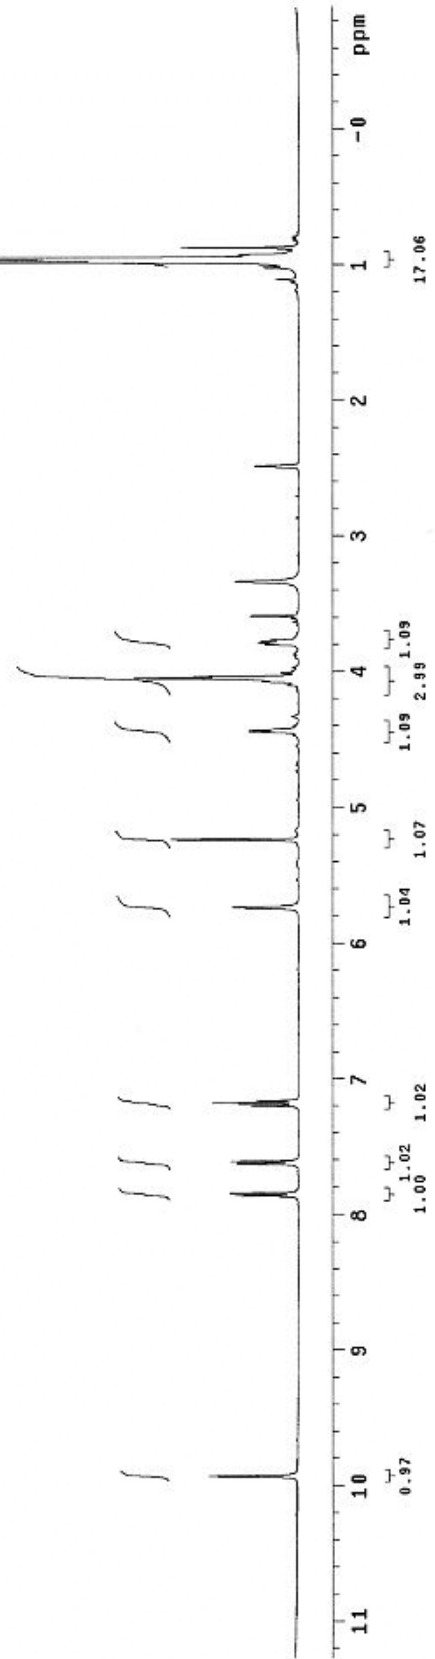

13C OBSERVE

Archive directory:  
/export/home/armandoh/vnmrsys/data  
Sample directory:

File: AHB-13rf54-13C-dmso

Pulse Sequence: s2pul  
Solvent: DMSO

Relax. delay 0.500 sec  
Puls. 38.4 degrees  
Acq. time 1.139 sec  
Width 25000.0 Hz  
672 Repetitions  
OBSERVE C13, 100.6086441 MHZ  
DECOUPLE H1, 400.1154568 MHZ  
power 43 dB,  
continuously on  
WALTZ-16 modulated  
DATA PROCESSING  
Line broadening 0.5 Hz  
FT size 65536  
Total time 58 min

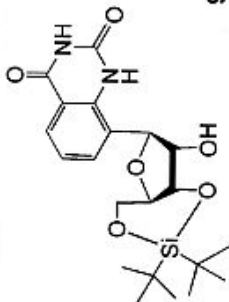

**9** <sup>13</sup>C-NMR  
(100 MHz; DMSO-d<sub>6</sub>)

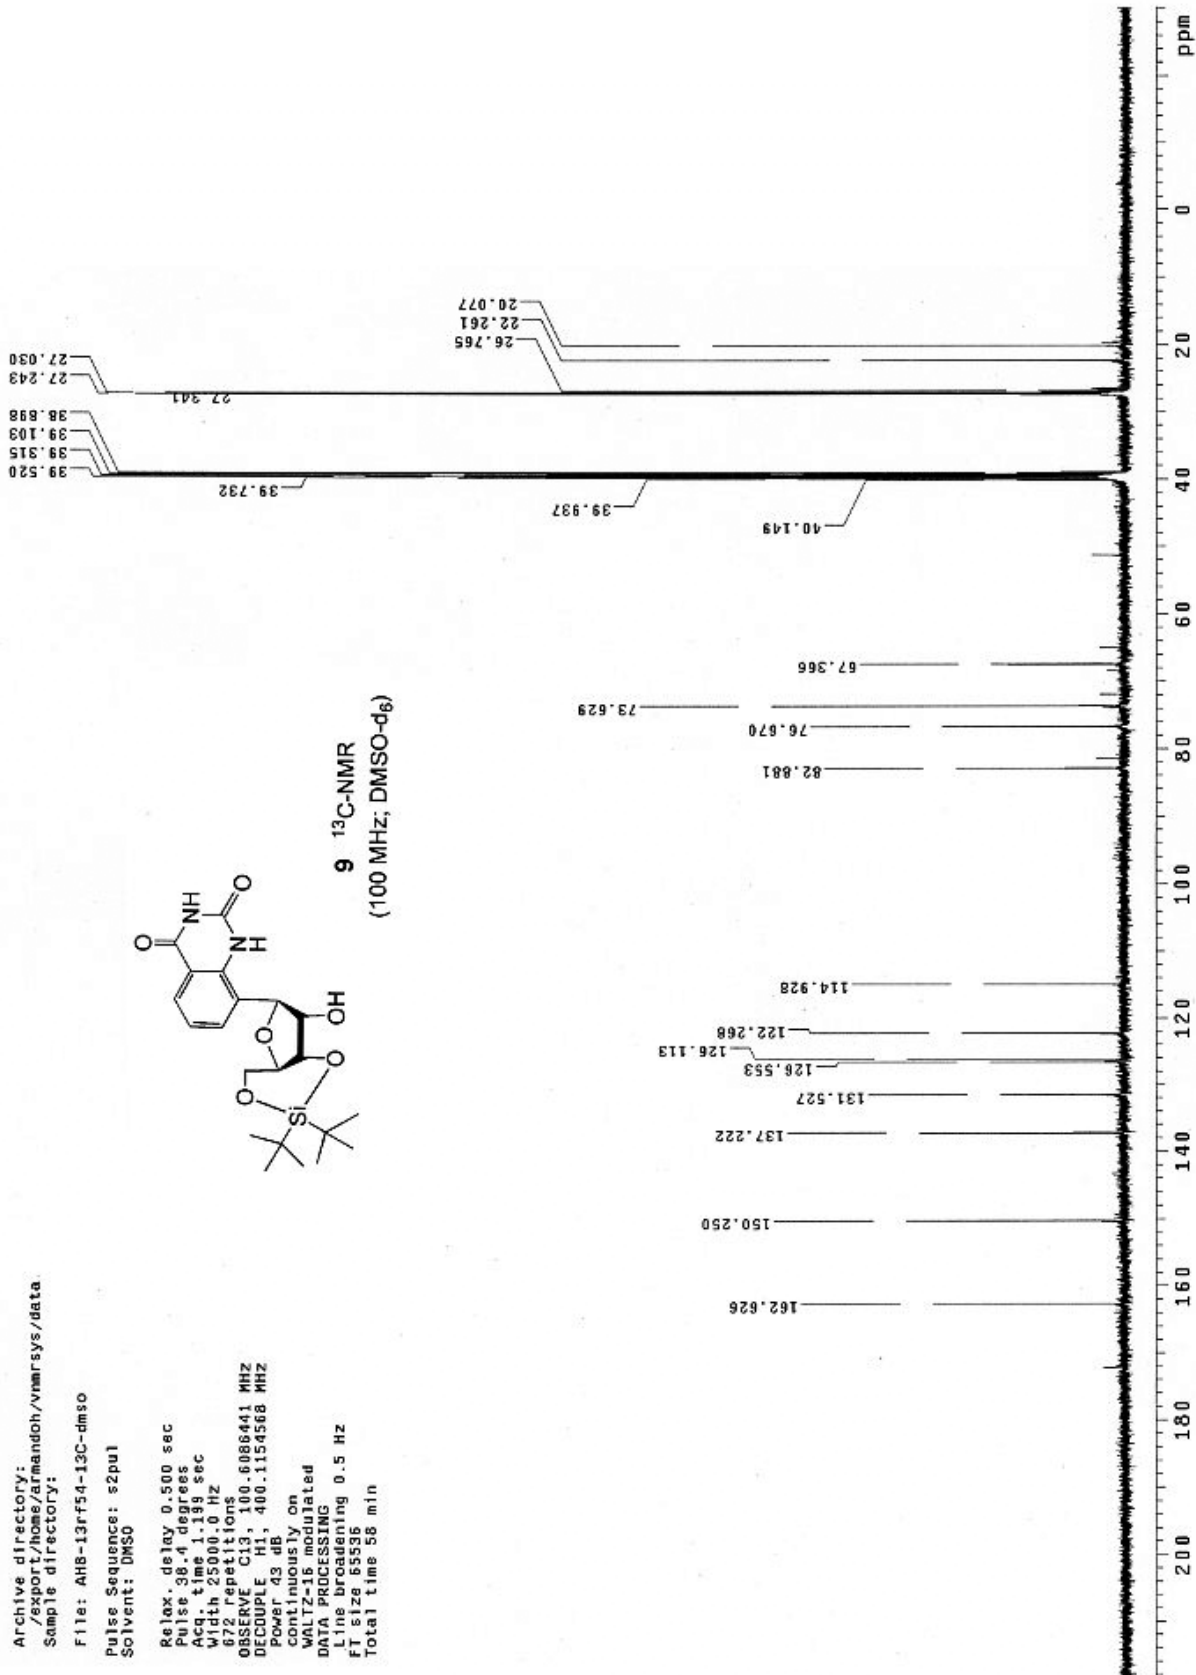

STANDARD 1H OBSERVE

Archive directory: /export/home/aramandoh/vnmr/sys/data  
Sample directory:

File: AHB-13rf54-gCOSY-dmso

Pulse Sequence: gCOSY  
Solvent: DMSO

Relax. delay 1.000 sec  
Acq. time 0.240 sec  
Width 4273.5 Hz  
2D Width 4273.5 Hz  
Single scan  
128 increments  
OBSERVE H1, 400.1134380 MHz  
DATA PROCESSING  
Sg. sine bell 0.120 sec  
F1 DATA PROCESSING  
Sg. sine bell 0.015 sec  
FT size 2048 x 2048  
Total time 3 min

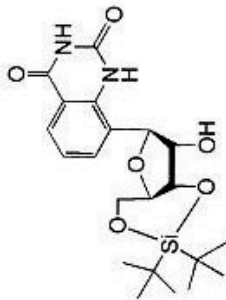

9 gCOSY  
(400 MHz; DMSO-d<sub>6</sub>)

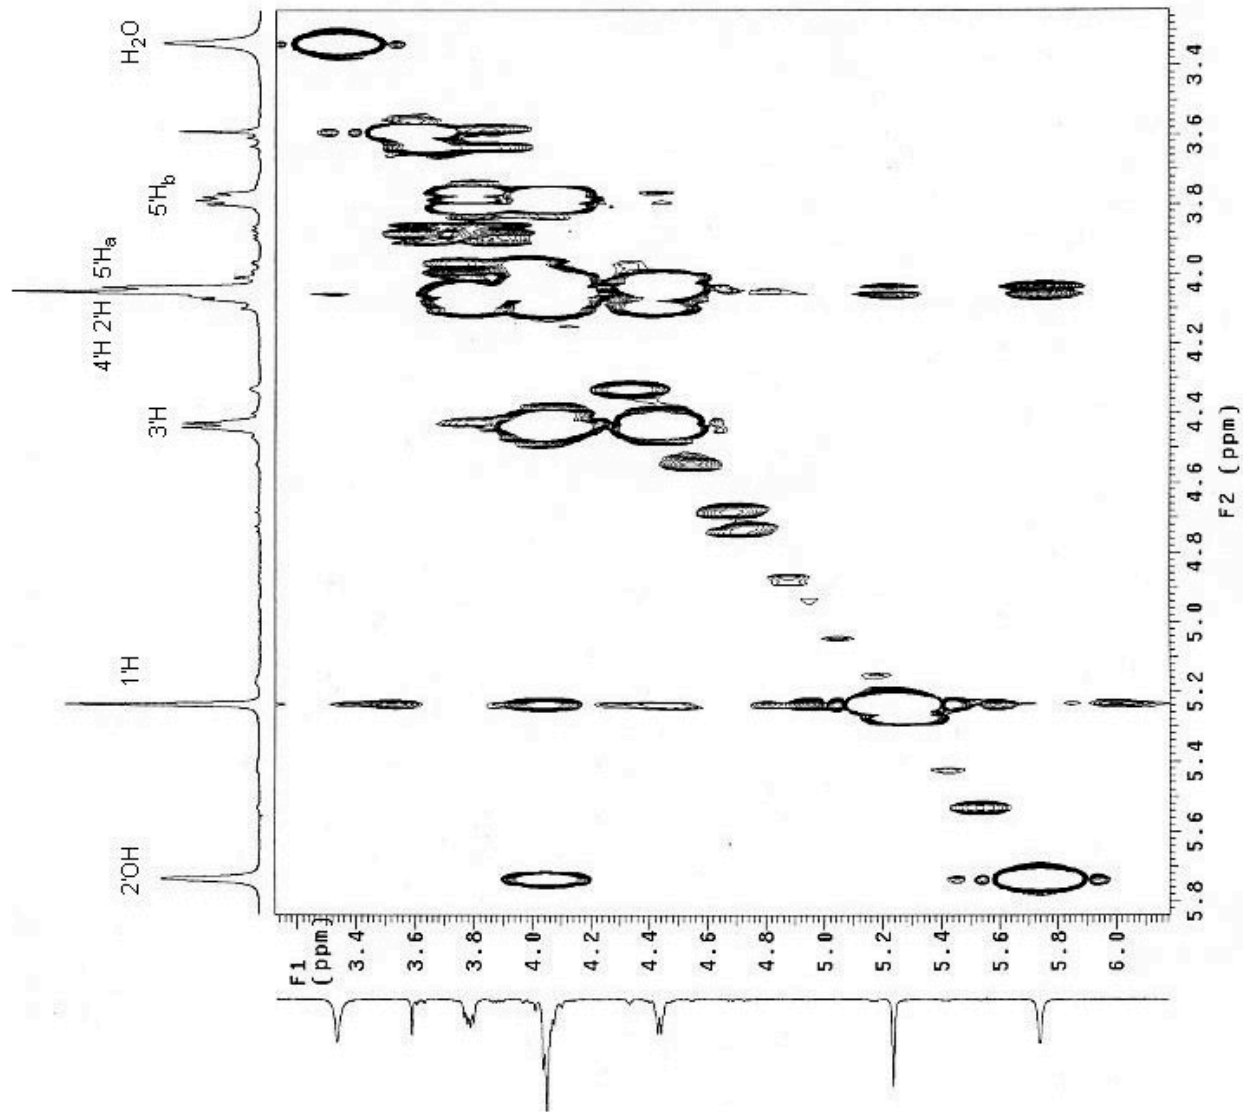

STANDARD PROTON PARAMETERS

Archive directory:  
/export/home/atmandoh/vnmrsys/data  
Sample directory:

File: AH7-82-Tr1Si1Prod

Pulse Sequence: szput

Solvent: CDCl3

Pulse 30.5 degrees  
Acq. time 4.000 sec  
Width 8000.0 Hz  
16 repetitions  
OBSERVE F1: 499.7485737 MHz  
DATA PROCESSING  
F1 size 65536  
Total time 1 min

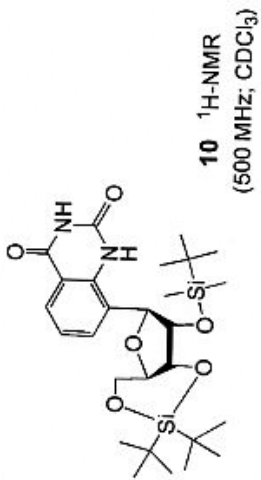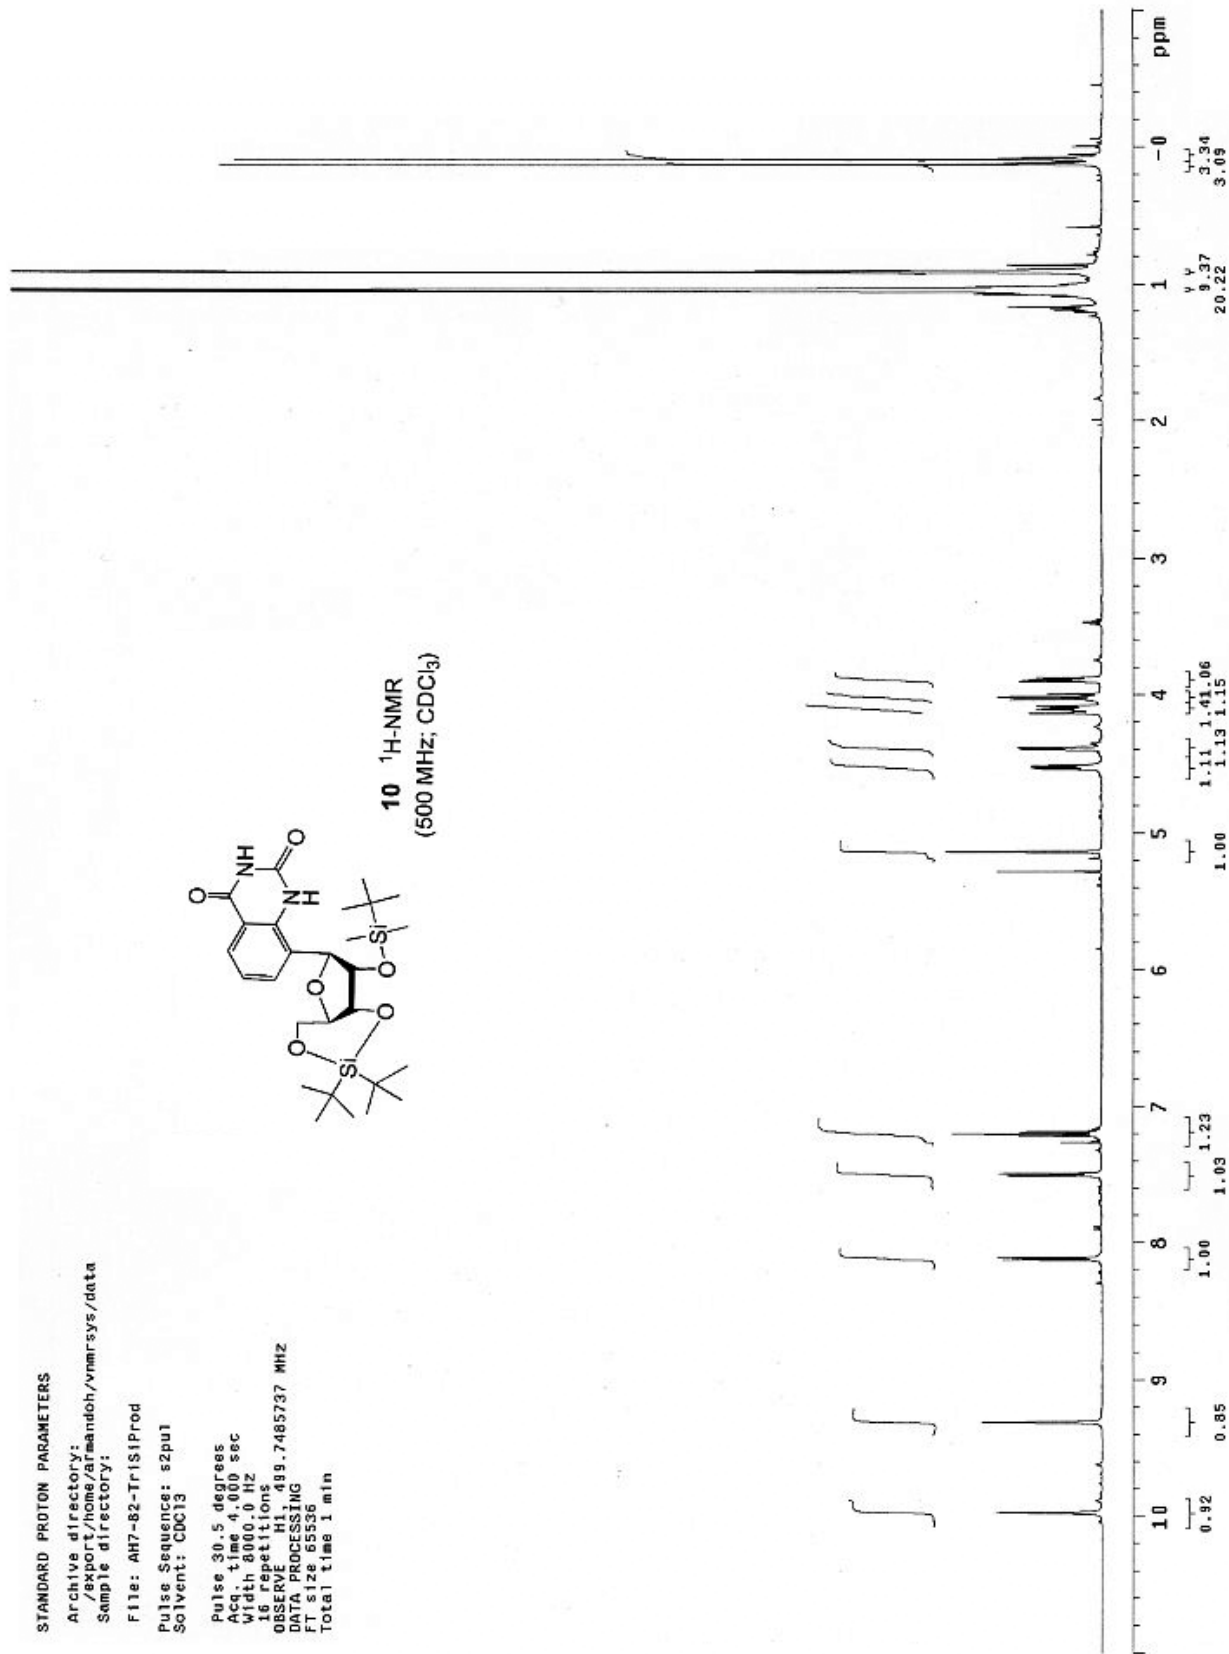

13C OBSERVE

Archive directory:  
/export/home/armandoh/vnmrSYS/data  
Sample directory:

File: AH8-14rf62-13C

Pulse Sequence: s2pul

Solvent: CDCl3

Relax. delay 0.500 sec

Pulse 38.4 degrees

Acq. time 1.183 sec

16000 25000.0 Hz

1000000 15.000 MHz

OBSERVE C13, 400.6081330 MHz

DECOUPLE H1, 400.1133562 MHz

Power 43 dB

continuously on

WALTZ-16 modulated

DATA PROCESSING

Line broadening 0.5 Hz

FT size 65536

Total time 29 min

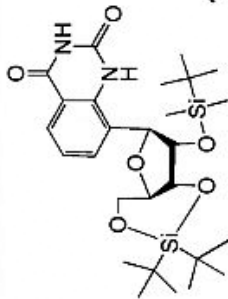

10 <sup>13</sup>C-NMR  
(100 MHz; CDCl<sub>3</sub>)

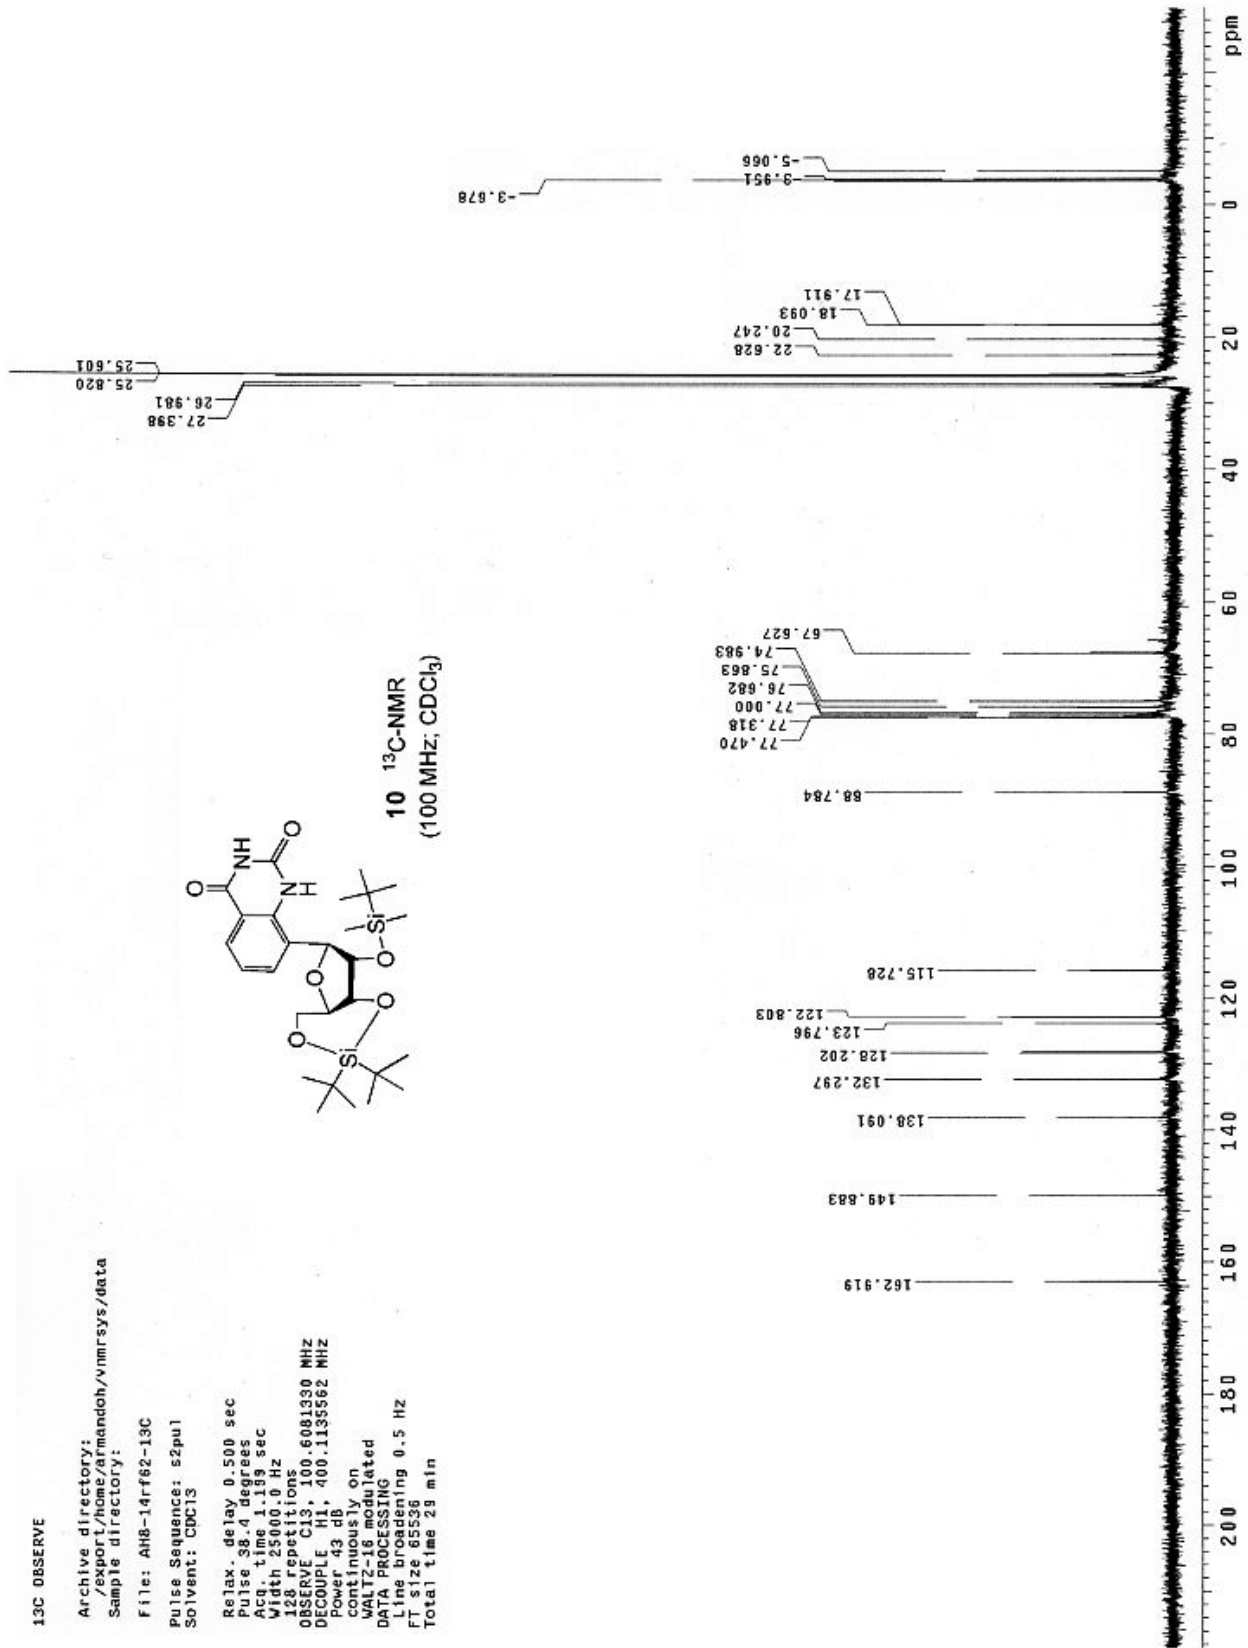

STANDARD 1H OBSERVE

Pulse Sequence: s2pu1  
Solvent: Acetone  
Ambient Temperature  
Mercury-40088 "merc400"

Relax. delay 0.500 sec  
Pulse 52.1 degrees  
Acq. time 4.092 sec  
Width 4997.5 Hz  
16 repetitions  
OBSERVE H1, 400.1136141 MHz  
DATA PROCESSING  
FT size 65536  
Total time 1 min, 22 sec

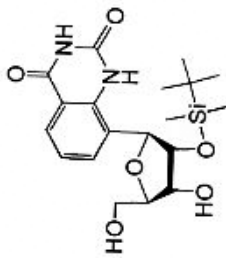

11 <sup>1</sup>H-NMR  
(400 MHz; Acetone-d<sub>6</sub>)

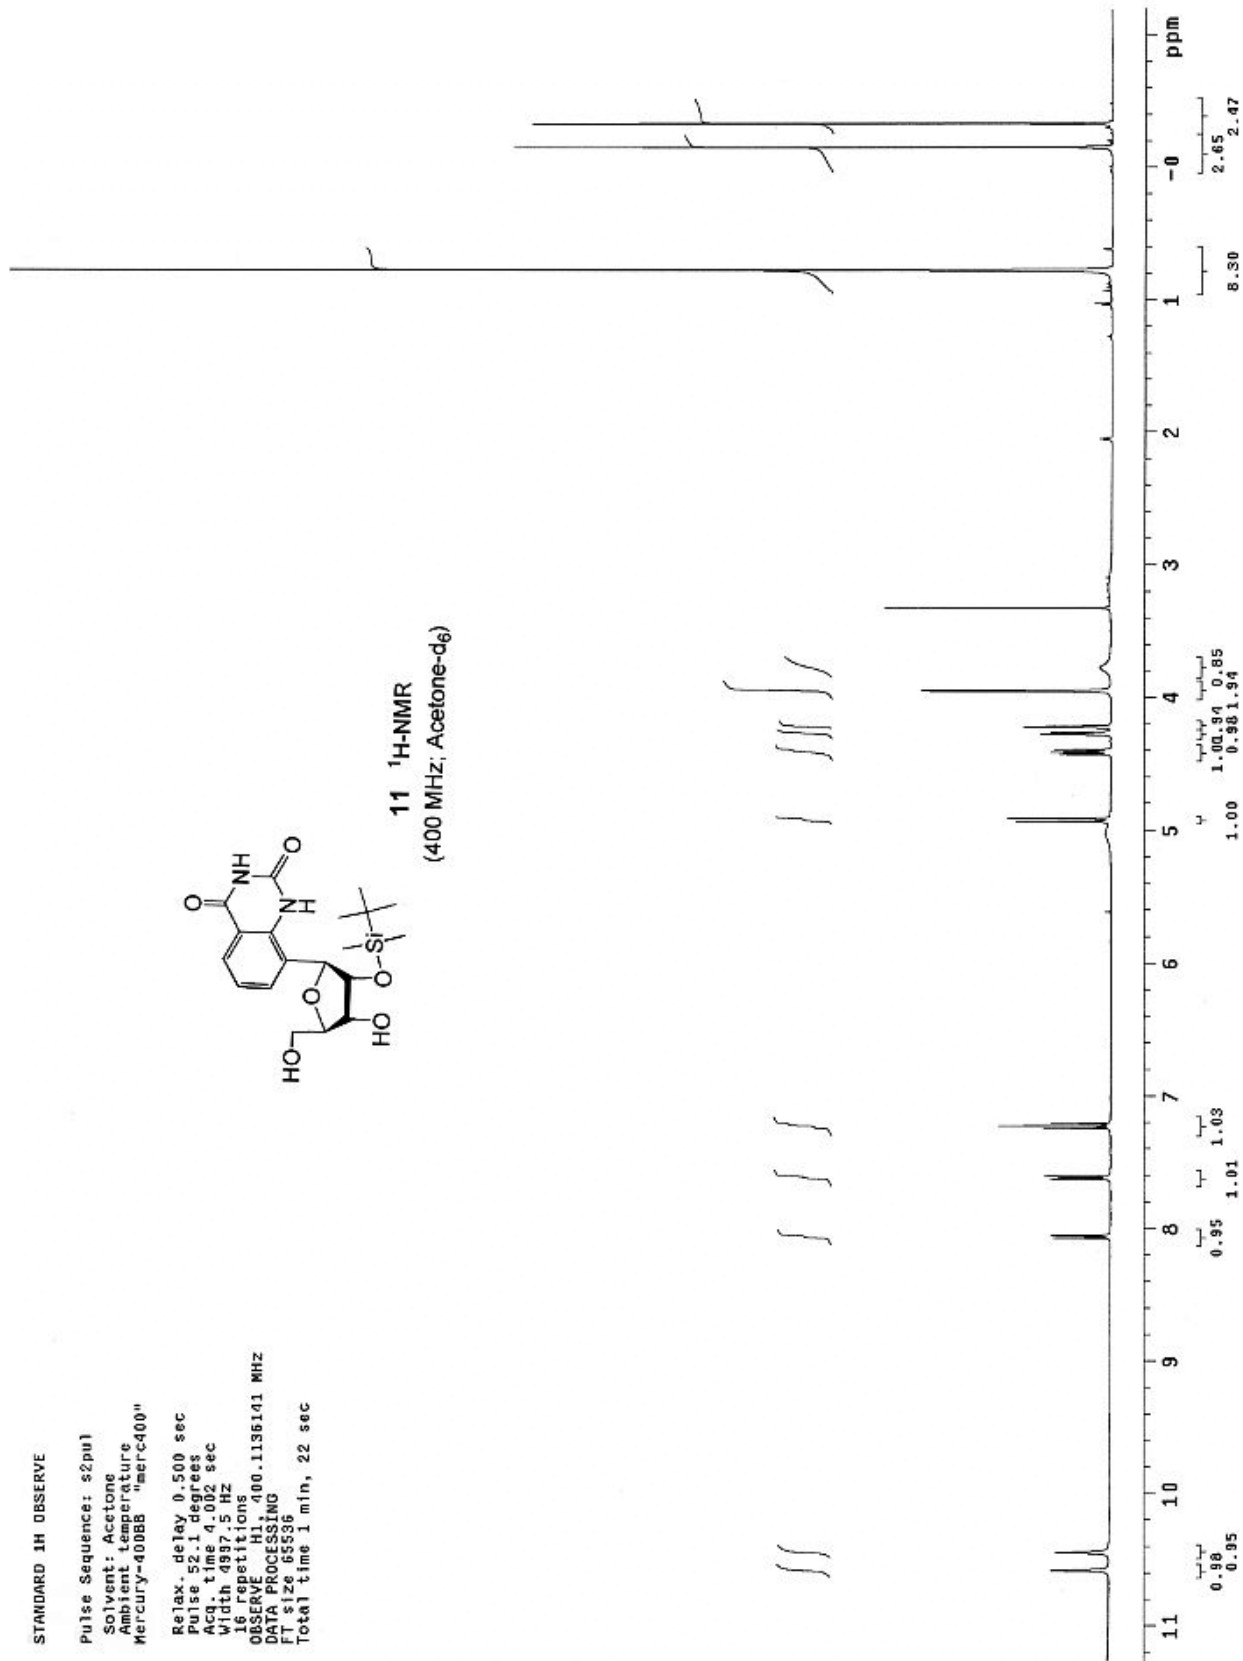



13C OBSERVE

Archive directory:  
/export/home/armandoh/vmarsys/data  
Sample directory:

File: AH8-15rf38-13C

Pulse Sequence: s2pul  
Solvent: Acetone

Relax. delay 0.500 sec  
Pulse 38.4 degrees  
Acq. time 1.199 sec  
Width 25000.0 Hz  
268 repetitions  
OBSERVE C13, 100.6085692 MHz  
DECOUPLE H1, 400.1156326 MHz  
Power 43 dB  
continuously on  
WALTZ-16 modulated  
DATA PROCESSING  
Line broadening 0.5 Hz  
FT size 65536  
Total time 23 min

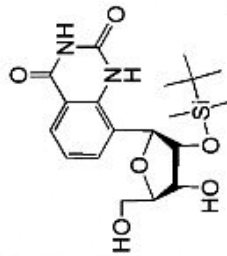

11 <sup>13</sup>C-NMR  
(100 MHz; Acetone-d<sub>6</sub>)

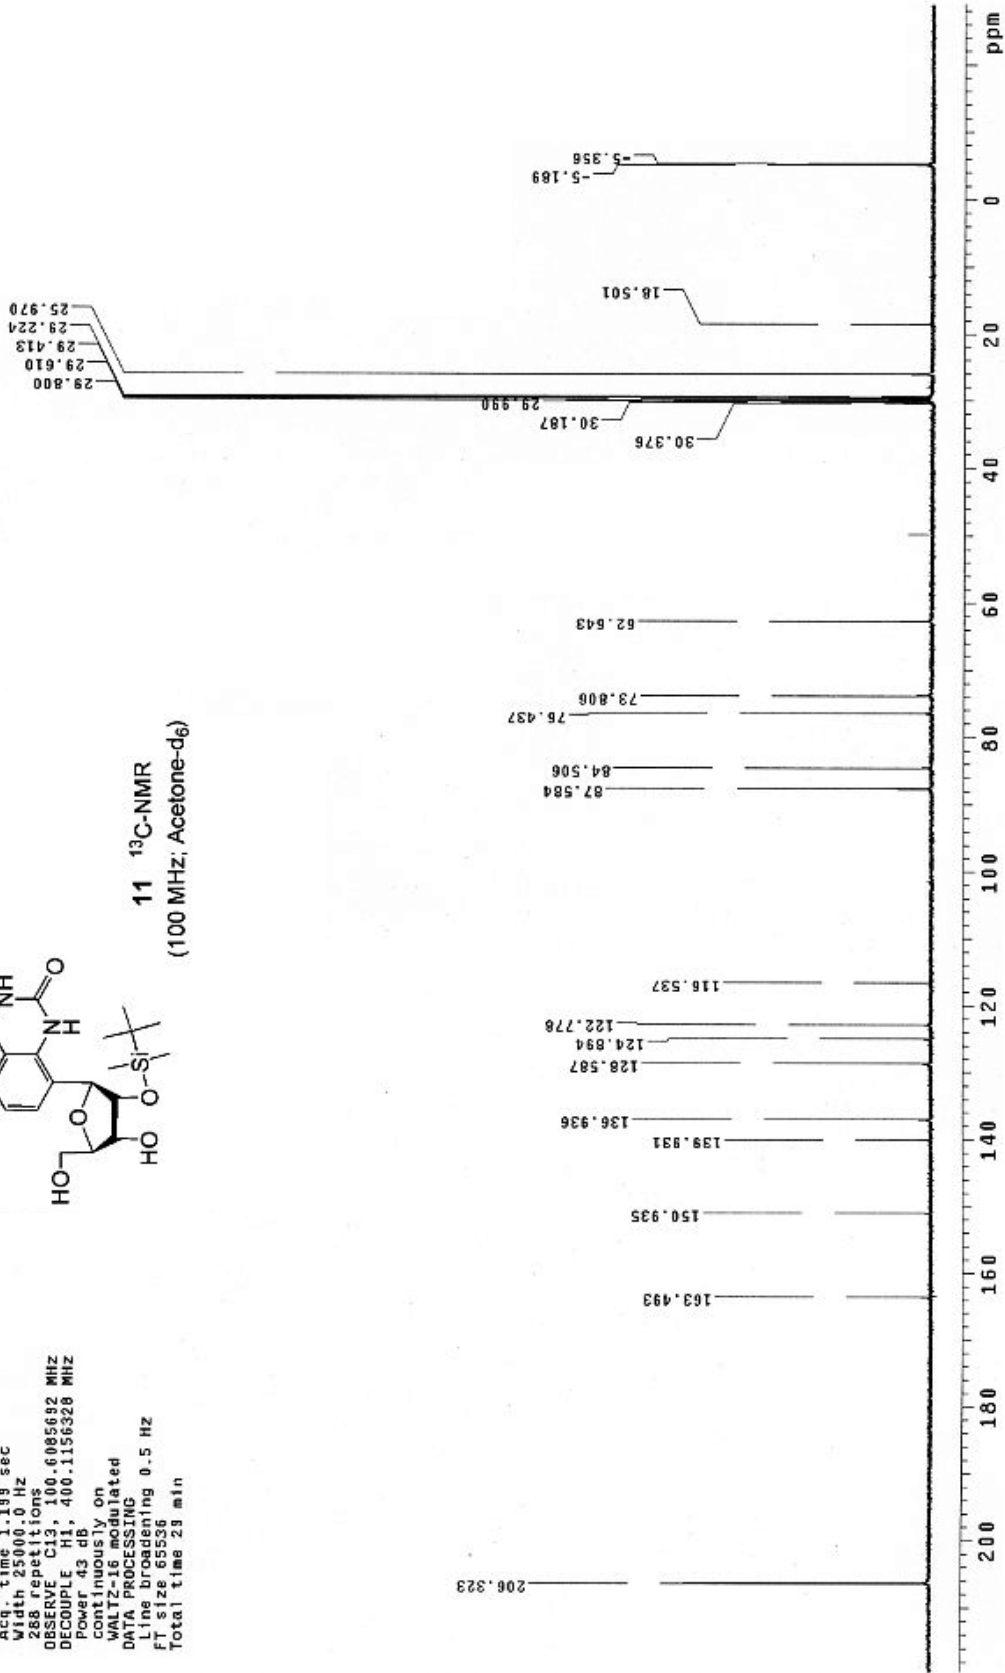

STANDARD 1H OBSERVE

Pulse Sequence: s2pul  
Solvent: CDCl3  
Ambient temperature  
Mercury-400BB "merc400"

Relax. delay 0.500 sec  
Pulse 52.1 degrees  
Acq. time 4.002 sec  
Width 4997.5 Hz  
16 repetitions  
OBSERVE 11.400.1115375 MHZ  
DATA PROCESSING  
F1 size 85536  
Total time 1 min, 22 sec

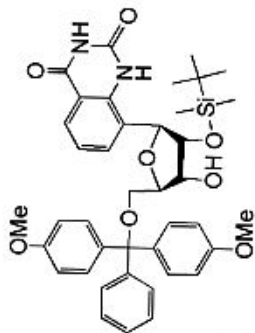

12 <sup>1</sup>H-NMR  
(400 MHz; CDCl<sub>3</sub>)

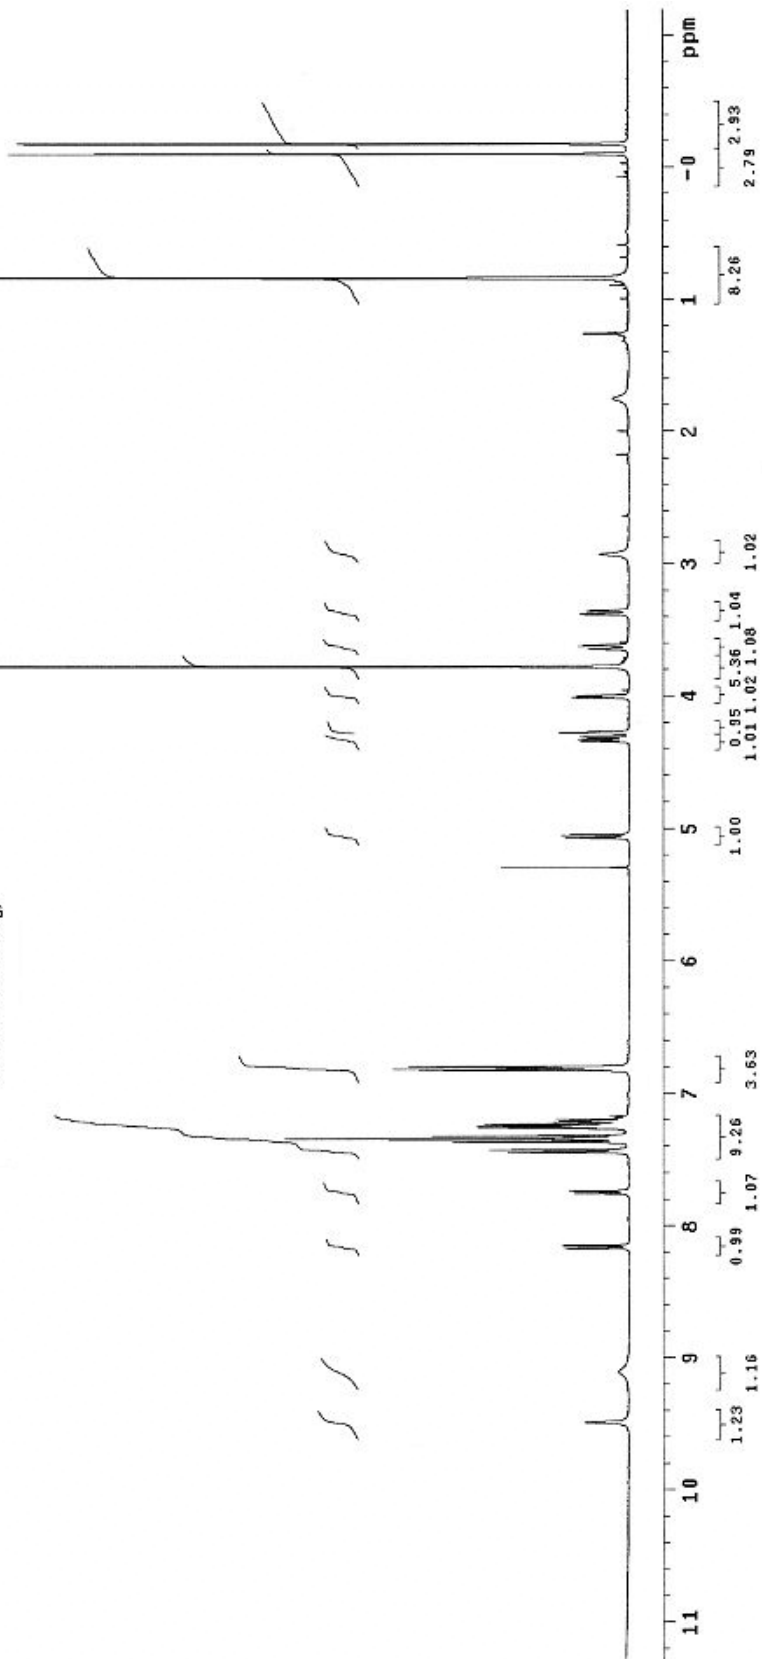

13C OBSERVE

Archive directory:  
/export/home/armando/h/vnmr/sys/data  
Sample directory:

File: AM8-17r757-13Cnew

Pulse Sequence: s2pu1  
Solvent: CDCl3

Relax. delay 0.500 sec  
Pulse 38.4 degrees  
Acq. time 1.199 sec  
Width 25000.0 Hz  
256 repetitions  
OBSERVE C13, 100.6081286 MHz  
DECOUPLE H1, 400.1135562 MHz  
Power 43 dB  
continuously on  
WALTZ-16 modulated  
DATA PROCESSING  
Line broadening 0.5 Hz  
FT size 65536  
Total time 29 min

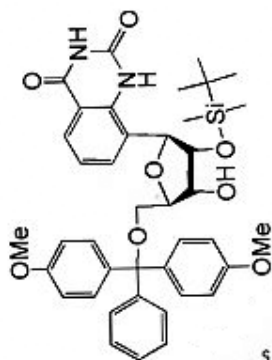

12 <sup>13</sup>C-NMR  
(100 MHz; CDCl<sub>3</sub>)

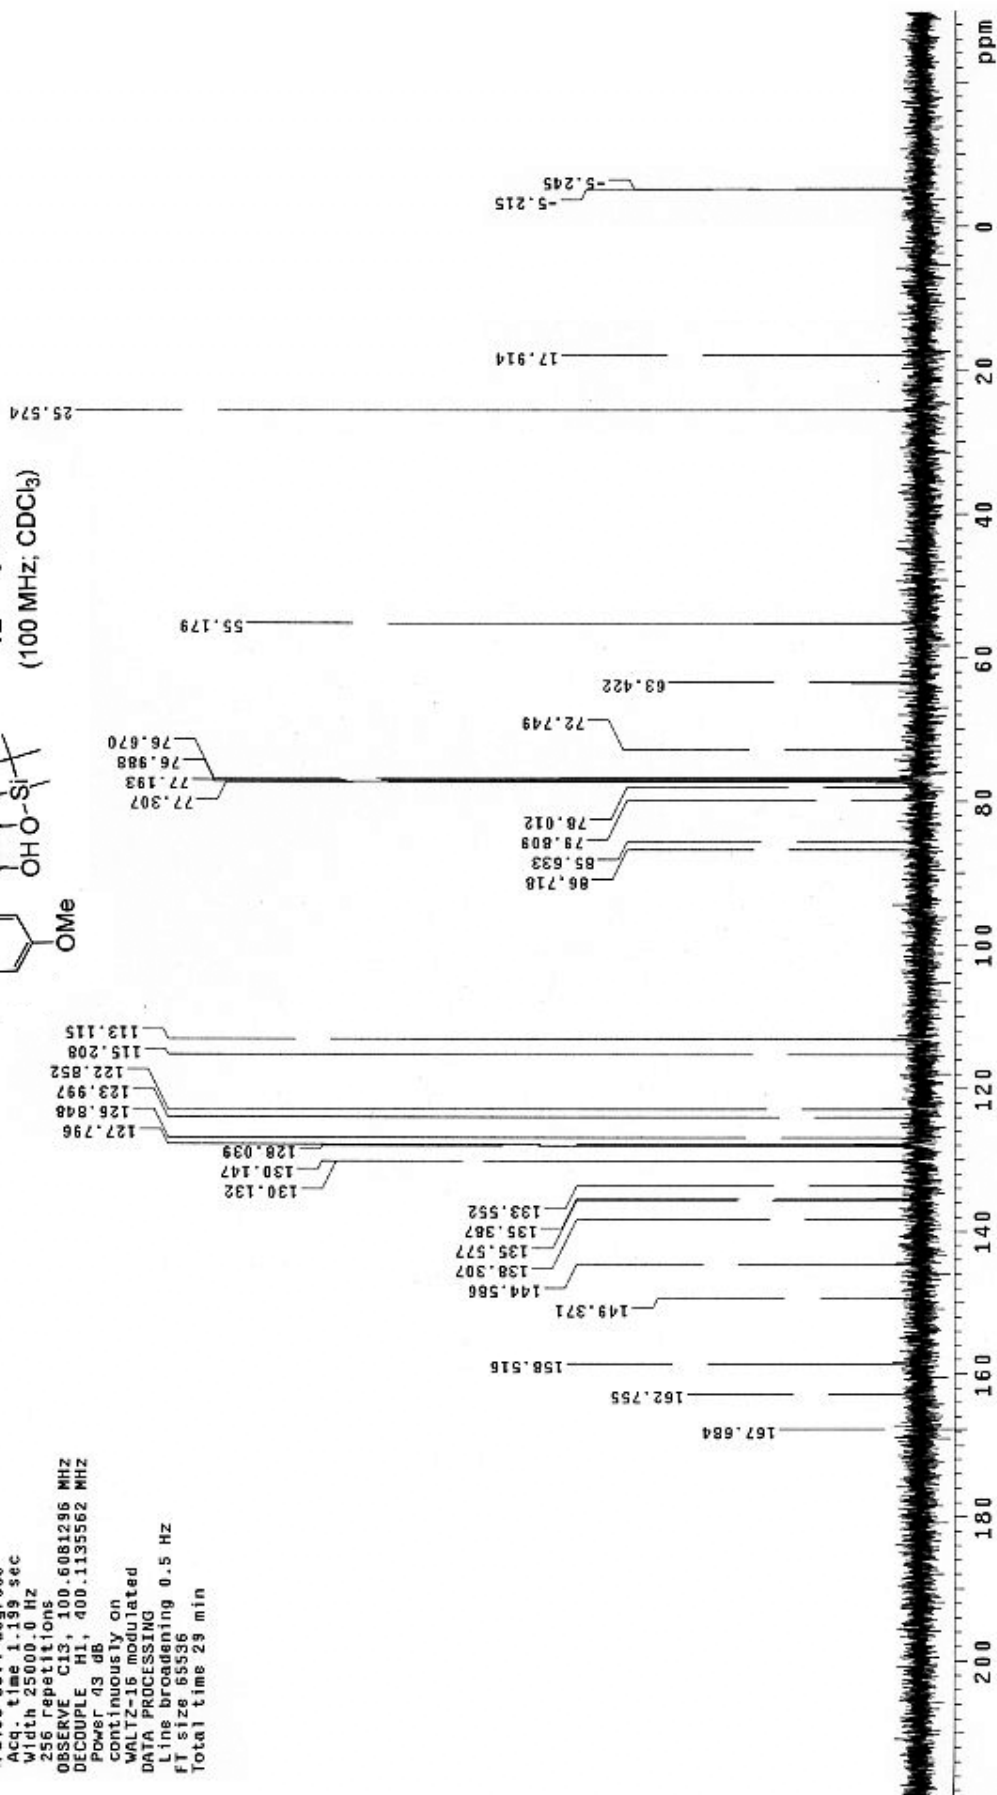

STANDARD 1H OBSERVE

Archive directory:  
/export/home/armandoh/vmarsys/data  
Sample directory:

File: AM8-17rf57-gCOSY

Pulse Sequence: gCOSY

Solvent: CDCl3

Relax. delay 1.000 sec

Acq. time 0.236 sec

Width 4347.8 Hz

2D Width 4347.8 Hz

Single scan

128 increments

OBSERVE F1: 400.1115375 MHz

DATA PROCESSING 0.118 sec

F2 DATA PROCESSING

Sc F1 size 2048 X 2048

FT size 2048 X 2048

Total time 3 min

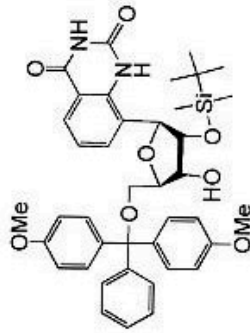

**12** g-COSY  
(400 MHz; CDCl<sub>3</sub>)

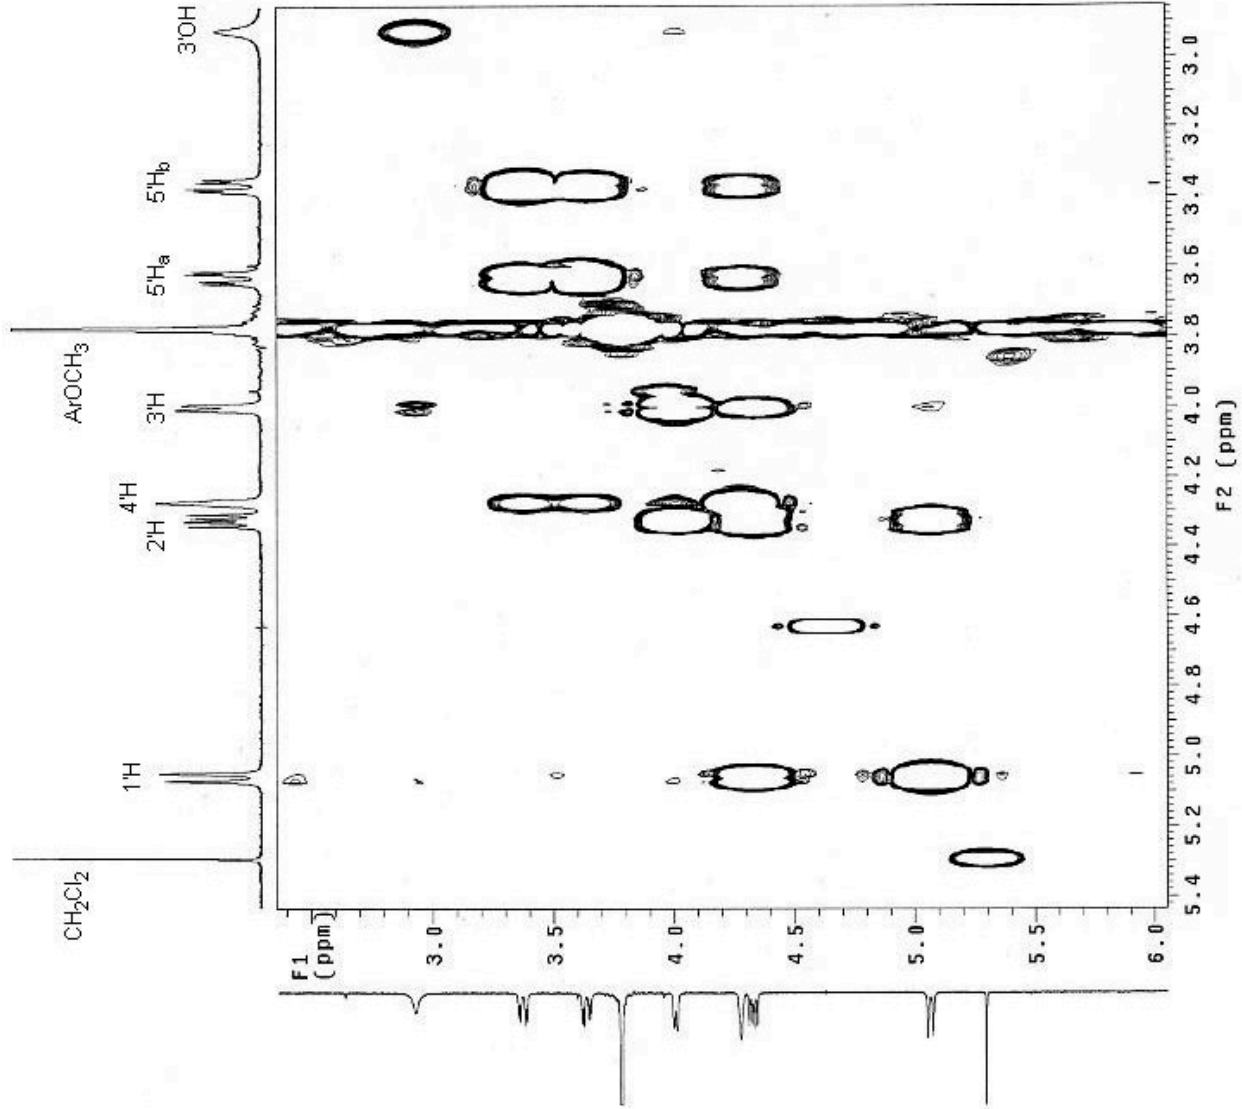

STANDARD 1H OBSERVE

Pulse Sequence: s2pul  
Solvent: CDCl3  
Ambient temperature  
Mercury-400BB "merca100"

Relax. delay 0.500 sec  
Pulse 52.1 degrees  
Acq. time 4.002 sec  
Width 4997.5 Hz  
16 repetitions  
OBSERVE H1, 400.1115375 MHz  
DATA PROCESSING  
FT size 65536  
Total time 1 min, 22 sec

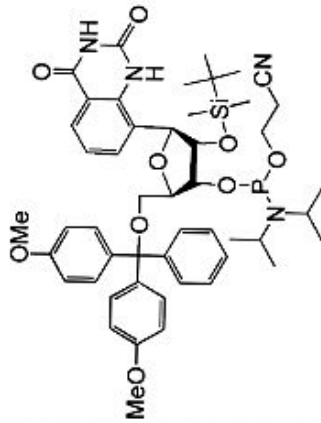

13 <sup>1</sup>H-NMR  
(400 MHz; CDCl<sub>3</sub>)

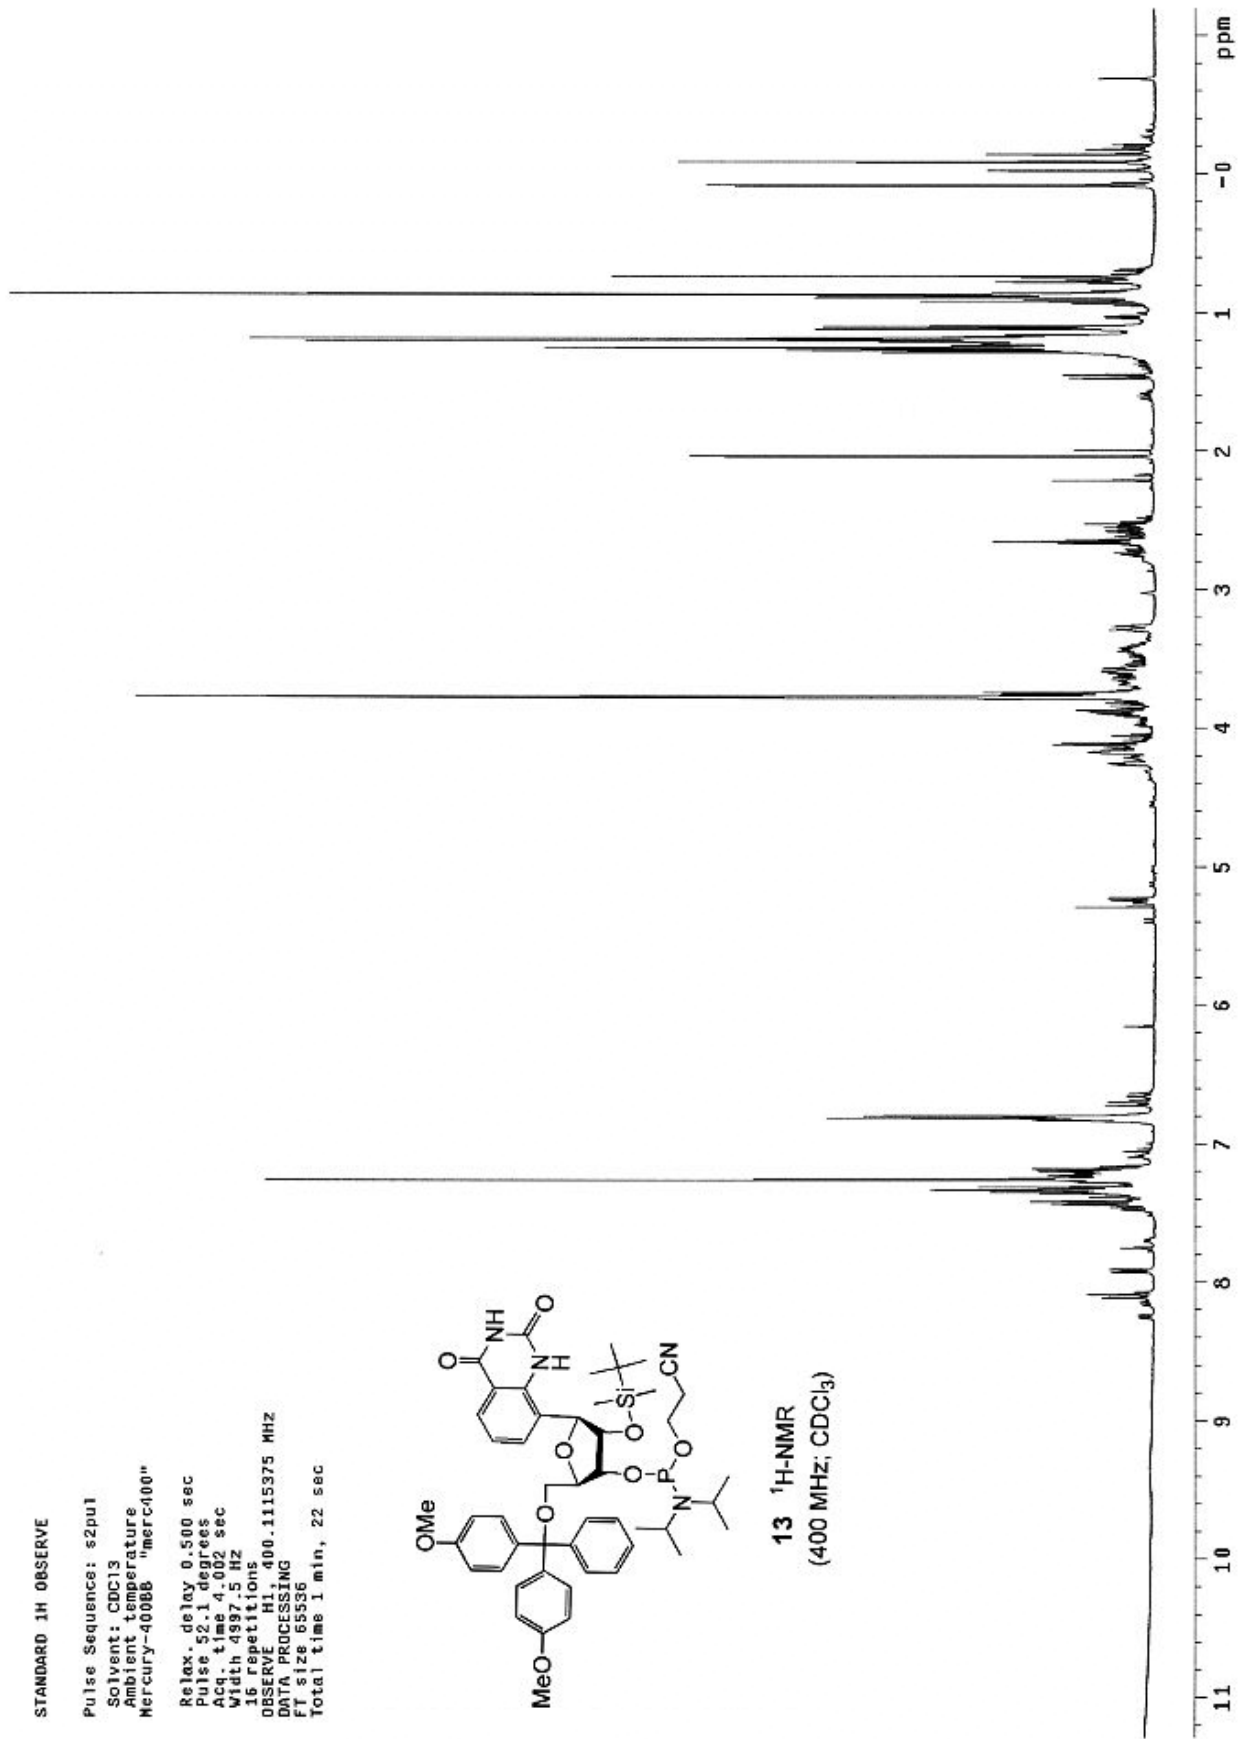

13C OBSERVE

Pulse Sequence: s2pu1  
 Solvent: CDCl3  
 Ambient temperature  
 Mercury-400BB "merc400"

Relax. delay 0.500 sec  
 Pulse 98.1 degrees  
 Acq. time 1.199 sec  
 Width 25000.0 Hz  
 640 repetitions  
 OBSERVE C13, 100.6081303 MHZ  
 DECOUPLE H1, 400.1135562 MHZ  
 Power 43 dB  
 continuously on  
 WALTZ-16 modulated  
 DATA PROCESSING  
 Line broadening 0.5 Hz  
 FT size 65536  
 Total time 33 min, 33 sec

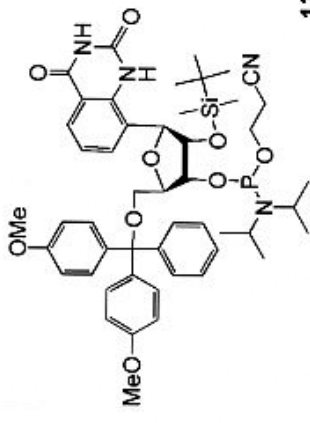

13 <sup>13</sup>C-NMR  
 (100 MHz; CDCl<sub>3</sub>)

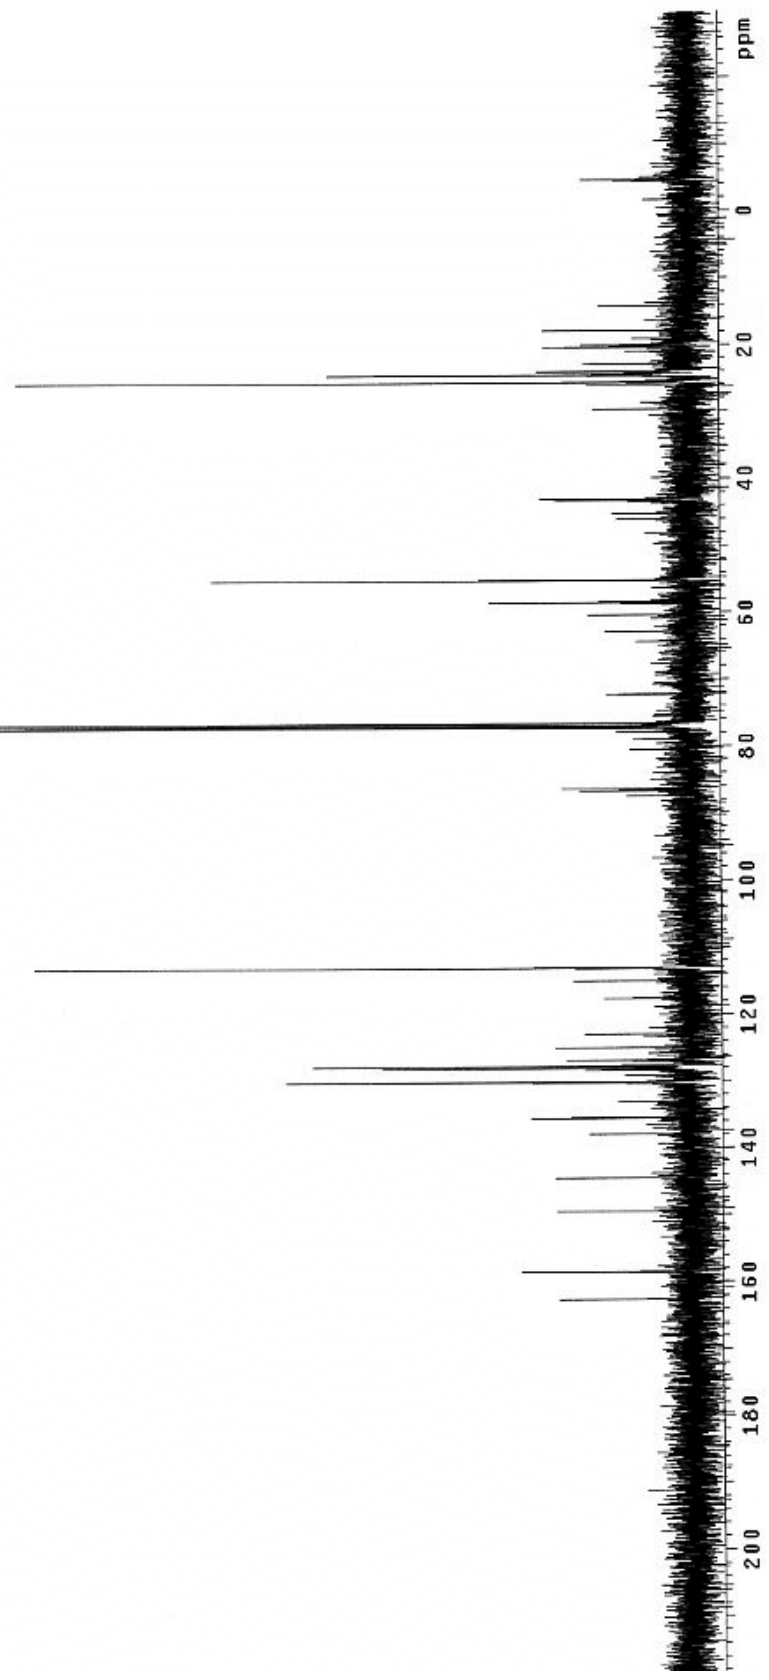

PHOSPHORUS OBSERVE  
STANDARD PARAMETERS  
PHOSPHATE REGION

Pulse Sequence: s2pu1

Solvent: CDCl3  
Ambient temperature  
Mercury-400BB "merc400"

Relax. delay 2.000 sec  
Pulse 47.4 degrees  
Acq. time 0.800 sec  
Width 50000.0 Hz  
128 repetitions  
OBSERVE P31, 161.9679984 MHZ  
DECOUPLE H1, 400.1135562 MHZ  
Power 43 dB  
continuously on  
WALTZ-16 modulated  
DATA PROCESSING  
Line broadening 1.0 Hz  
FT size 131072  
Total time 0 min, 0 sec

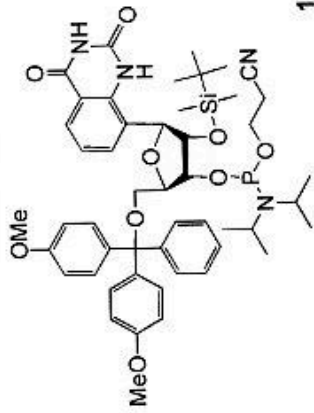

**13**  $^{31}\text{P}$ -NMR  
(162 MHz;  $\text{CDCl}_3$ )

147.736

151.651

0.36  
1.00

140 120 100 80 60 40 20 0 20 40 60 80 100 120 ppm
